# Supplementary material for: CN bond formation via palladium-catalyzed carbene insertion into NN bonds: inhibiting the general 1,2-migration process of ylide intermediates
Source: Royal Society of Chemistry journal article supplement (doi:10.1039/c6cc10187a), 2017-01-01

# Supporting Information

## C=N Bonds Formation via Palladium-Catalyzed Carbene Insertion into N=N Bonds: Inhibiting the General 1,2- Migration Process of Ylide Intermediates

Chuanle Zhu, Pengquan Chen, Rui Zhu, Zhiming Lin, Wanqing Wu\*, Huanfeng Jiang\*

Key Laboratory of Functional Molecular Engineering of Guangdong Province, School of Chemistry and Chemical Engineering, School of Chemistry and Chemical Engineering, South China University of Technology, Guangzhou 51640, P. R. China

E-mail: cewuwq@scut.edu.cn, jianghf@scut.edu.cn; Fax and Tel.: (+86) 20-87112906

### Table of Contents

|                                                                                                            |           |
|------------------------------------------------------------------------------------------------------------|-----------|
| <b>A. General Information .....</b>                                                                        | <b>1</b>  |
| <b>B. General Procedure for the Carbene Insertion of <i>N</i>-tosylhydrazones with Azo Compounds .....</b> | <b>2</b>  |
| <b>C. Analysis Data for the Products .....</b>                                                             | <b>2</b>  |
| <b>D. Procedure for the Gram-Scale Synthesis of 3a , 5a and 5g .....</b>                                   | <b>18</b> |
| <b>E. Procedure for the Synthesis of Chiral Hydrozones .....</b>                                           | <b>18</b> |
| <b>F. X-ray Crystallographic Data .....</b>                                                                | <b>21</b> |
| <b>G. NMR Spectra of New Compounds .....</b>                                                               | <b>23</b> |

## A. General Information

Melting points were measured using a melting point instrument and are uncorrected. Chemical shifts were reported in ppm from the solvent resonance as the internal standard ( $\text{CDCl}_3$   $\delta_{\text{H}} = 7.26$  ppm,  $\delta_{\text{C}} = 77.16$  ppm;  $\text{D}_2\text{O}$   $\delta_{\text{H}} = 4.79$  ppm). Multiplicity was indicated as follows: s (singlet), d (doublet), t (triplet), q (quartet), m (multiplet). Coupling constants were reported in Hertz (Hz). IR spectra were obtained with an infrared spectrometer on either potassium bromide pellets or liquid films between two potassium bromide pellets. GC–MS data were obtained using electron ionization. HRMS was carried out on a high-resolution mass spectrometer (LCMS-IT-TOF). TLC was performed using commercially available 100–400 mesh silica gel plates (GF<sub>254</sub>). X-ray structural analyses were conducted on an X-ray analysis instrument.

**Materials.** Tetrahydrofuran (THF) and toluene were distilled from sodium/benzophenone; 1,2-dichloroethane (DCE) was distilled from calcium hydride; acetonitrile ( $\text{CH}_3\text{CN}$ ) was distilled from phosphorus pentoxide. Other commercially available reagents were purchased and used without further purification. Analytical thin-layer chromatography was performed on 0.20 mm silica gel plates (GF<sub>254</sub>) using UV light as a visualizing agent. Flash column chromatography was carried out using silica gel (200–300 mesh) with the indicated solvent system. All reactions were conducted in oven-dried Schlenk tubes. All the reaction temperatures reported are oil bath temperatures.

## B. General Procedure for the Carbene Insertion of *N*-Tosylhydrazones with Azo Compounds

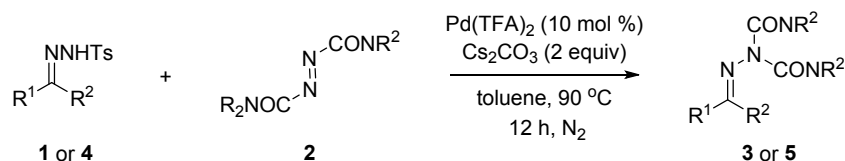

A 25 mL Schlenk tube placed with a magnetic stirring bar, *N*-tosylhydrazones (0.2 mmol), Pd(TFA)<sub>2</sub> (10 mmol %), Cs<sub>2</sub>CO<sub>3</sub> (0.2 mmol), toluene (2 mL), and azo compound **2** (0.1 mmol) was vigorously stirred at 90 °C for 12 h under N<sub>2</sub> in an oil bath. Then the resulting solution was cooled to room temperature, added water (10 mL), extracted with EtOAc (3 × 10 mL). The combined organic phases were dried over anhydrous Na<sub>2</sub>SO<sub>4</sub>, filtered and concentrated *in vacuo*. Further purification by flash column chromatography on silica gel (eluting with petroleum ether/ethyl acetate) provided the pure product **3** or **5**.

## C. Analysis Data for the Products

### (*E*)-2-Benzylidene-*N,N,N',N'*-Tetramethylhydrazine-1,1-Dicarboxamide (**3a**)

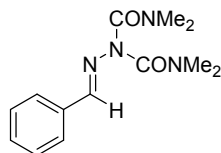

23.8 mg, 91% yield; viscous liquid; TLC (petroleum ether/ethyl acetate, 1:2 v/v):  $R_f = 0.40$ ; <sup>1</sup>H NMR (400 MHz, CDCl<sub>3</sub>) δ 7.80 (s, 1H), 7.63–7.66 (m, 2H), 7.36–7.38 (m, 3H), 3.06 (s, 12H); <sup>13</sup>C NMR (100 MHz, CDCl<sub>3</sub>) δ 156.2, 145.7, 134.5, 129.9, 128.6, 127.1, 37.6; IR (KBr): 2930, 1688, 1487, 1380, 1261, 1160, 1061 cm<sup>-1</sup>; HRMS (ESI, m/z): [M+H]<sup>+</sup> Calcd. for C<sub>13</sub>H<sub>18</sub>N<sub>4</sub>O<sub>2</sub>+H, 263.1503; found, 263.1501.

### (*E*)-*N,N,N',N'*-Tetramethyl-2-(naphthalen-1-ylmethylene)hydrazine-1,1-Dicarboxamide (**3b**)

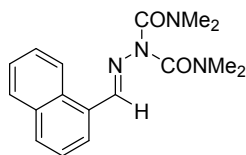

26.2 mg, 84% yield; viscous liquid; TLC (petroleum ether/ethyl acetate, 1:2 v/v):  $R_f = 0.42$ ; <sup>1</sup>H NMR (400 MHz, CDCl<sub>3</sub>) δ 7.63–7.66 (m, 2H), 7.86–7.89 (m, 3H), 7.46–7.57 (m, 3H), 3.09 (s,

12H);  $^{13}\text{C}$  NMR (100 MHz,  $\text{CDCl}_3$ )  $\delta$  156.5, 146.1, 133.8, 131.0, 130.5, 130.1, 128.7, 127.0, 126.8, 126.1, 125.3, 124.0, 37.7; IR (KBr): 2929, 1687, 1488, 1380, 1262, 1161, 1063  $\text{cm}^{-1}$ ; HRMS (ESI,  $m/z$ ):  $[\text{M}+\text{Na}]^+$  Calcd. for  $\text{C}_{17}\text{H}_{20}\text{N}_4\text{O}_2+\text{Na}$ , 335.1478; found, 335.1479.

**(E)-2-(4-Fluorobenzylidene)-N,N,N',N'-Tetramethylhydrazine-1,1-Dicarboxamide (3c)**

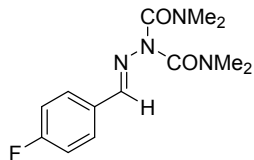

24.6 mg, 88% yield; viscous liquid; TLC (petroleum ether/ethyl acetate, 1:2 v/v):  $R_f$  = 0.41;  $^1\text{H}$  NMR (400 MHz,  $\text{CDCl}_3$ )  $\delta$  7.80 (s, 1H), 7.62–7.66 (m, 2H), 7.07 (t,  $J$  = 8.8 Hz, 2H), 3.06 (s, 12H);  $^{13}\text{C}$  NMR (100 MHz,  $\text{CDCl}_3$ )  $\delta$  163.7 (d,  $^1J_{\text{F-C}}$  = 248.7 Hz), 156.2, 145.0, 130.7 (d,  $^4J_{\text{F-C}}$  = 3.2 Hz), 128.9 (d,  $^3J_{\text{F-C}}$  = 8.4 Hz), 115.7 (d,  $^2J_{\text{F-C}}$  = 21.8 Hz), 37.6; IR (KBr): 2929, 1688, 1495, 1377, 1230, 1156, 1061  $\text{cm}^{-1}$ ; HRMS (ESI,  $m/z$ ):  $[\text{M}+\text{H}]^+$  Calcd. for  $\text{C}_{13}\text{H}_{17}\text{FN}_4\text{O}_2+\text{H}$ , 281.1408; found, 281.1407.

**(E)-2-(2-Chlorobenzylidene)-N,N,N',N'-Tetramethylhydrazine-1,1-Dicarboxamide (3d)**

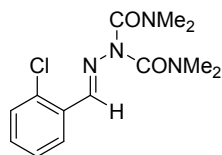

25.2 mg, 85% yield; viscous liquid; TLC (petroleum ether/ethyl acetate, 1:2 v/v):  $R_f$  = 0.41;  $^1\text{H}$  NMR (400 MHz,  $\text{CDCl}_3$ )  $\delta$  7.80 (s, 1H), 7.94–7.96 (m, 1H), 7.35–7.37 (m, 1H), 7.27–7.30 (m, 2H), 3.06 (s, 12H);  $^{13}\text{C}$  NMR (100 MHz,  $\text{CDCl}_3$ )  $\delta$  156.0, 142.2, 134.3, 132.0, 130.7, 129.8, 126.9, 126.8, 37.6; IR (KBr): 2931, 1686, 1498, 1381, 1262, 1158, 1054  $\text{cm}^{-1}$ ; HRMS (ESI,  $m/z$ ):  $[\text{M}+\text{Na}]^+$  Calcd. for  $\text{C}_{13}\text{H}_{17}\text{ClN}_4\text{O}_2+\text{Na}$ , 319.0932; found, 319.0935.

**(E)-2-(4-Chlorobenzylidene)-N,N,N',N'-Tetramethylhydrazine-1,1-Dicarboxamide (3e)**

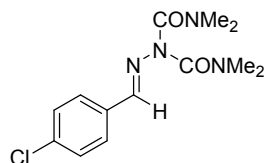

26.0 mg, 88% yield; viscous liquid; TLC (petroleum ether/ethyl acetate, 1:2 v/v):  $R_f$  = 0.41;  $^1\text{H}$  NMR (400 MHz,  $\text{CDCl}_3$ )  $\delta$  7.79 (s, 1H), 7.58 (d,  $J$  = 8.4 Hz, 2H), 7.34 (d,  $J$  = 8.4 Hz, 2H), 3.06 (s,

12H);  $^{13}\text{C}$  NMR (100 MHz,  $\text{CDCl}_3$ )  $\delta$  156.1, 144.6, 135.7, 133.1, 128.9, 128.2, 37.6; IR (KBr): 2928, 1687, 1487, 1377, 1261, 1159, 1087  $\text{cm}^{-1}$ ; HRMS (ESI,  $m/z$ ):  $[\text{M}+\text{H}]^+$  Calcd. for  $\text{C}_{13}\text{H}_{17}\text{ClN}_4\text{O}_2+\text{H}$ , 297.1113; found, 297.1111.

**(E)-2-(4-Bromobenzylidene)-N,N,N',N'-Tetramethylhydrazine-1,1-Dicarboxamide (3f)**

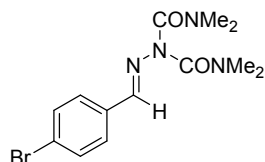

30.9 mg, 91% yield; viscous liquid; TLC (petroleum ether/ethyl acetate, 1:2 v/v):  $R_f$  = 0.40;  $^1\text{H}$  NMR (400 MHz,  $\text{CDCl}_3$ )  $\delta$  7.77 (s, 1H), 7.44–7.58 (m, 4H), 3.06 (s, 12H);  $^{13}\text{C}$  NMR (100 MHz,  $\text{CDCl}_3$ )  $\delta$  156.0, 144.6, 133.5, 131.8, 128.5, 124.0, 37.6; IR (KBr): 2929, 1688, 1486, 1378, 1261, 1159, 1063  $\text{cm}^{-1}$ ; HRMS (ESI,  $m/z$ ):  $[\text{M}+\text{Na}]^+$  Calcd. for  $\text{C}_{13}\text{H}_{17}\text{BrN}_4\text{O}_2+\text{Na}$ , 363.0427; found, 363.0423.

**(E)-2-(3-Bromobenzylidene)-N,N,N',N'-Tetramethylhydrazine-1,1-Dicarboxamide (3g)**

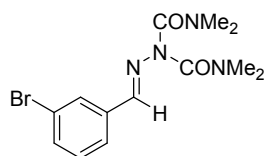

30.9 mg, 91% yield; viscous liquid; TLC (petroleum ether/ethyl acetate, 1:2 v/v):  $R_f$  = 0.42;  $^1\text{H}$  NMR (400 MHz,  $\text{CDCl}_3$ )  $\delta$  7.82 (s, 1H), 7.75 (s, 1H), 7.52 (d,  $J$  = 8.0 Hz, 1H), 7.4 (d,  $J$  = 8.0 Hz, 1H), 7.25 (t,  $J$  = 8.0 Hz, 1H), 3.06 (s, 12H);  $^{13}\text{C}$  NMR (100 MHz,  $\text{CDCl}_3$ )  $\delta$  155.9, 143.9, 136.6, 130.2, 129.5, 126.0, 122.9, 37.6; IR (KBr): 2929, 1688, 1483, 1381, 1261, 1158, 1060  $\text{cm}^{-1}$ ; HRMS (ESI,  $m/z$ ):  $[\text{M}+\text{Na}]^+$  Calcd. for  $\text{C}_{13}\text{H}_{17}\text{BrN}_4\text{O}_2+\text{Na}$ , 363.0427; found, 363.0429.

**(E)-N,N,N',N'-Tetramethyl-2-(4-(Trifluoromethyl)benzylidene)hydrazine-1,1-Dicarboxamide (3h)**

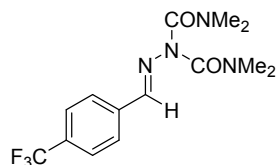

30.0 mg, 91% yield; viscous liquid; TLC (petroleum ether/ethyl acetate, 1:2 v/v):  $R_f$  = 0.43;  $^1\text{H}$

NMR (400 MHz, CDCl<sub>3</sub>)  $\delta$  7.87 (s, 1H), 7.75 (d,  $J$  = 8.4 Hz, 2H), 7.62 (d,  $J$  = 8.4 Hz, 2H), 3.08 (s, 12H); <sup>13</sup>C NMR (100 MHz, CDCl<sub>3</sub>)  $\delta$  155.8, 143.7, 138.0, 131.3 (q, <sup>2</sup> $J_{F-C}$  = 33.4 Hz), 127.2, 125.6 (q, <sup>3</sup> $J_{F-C}$  = 3.8 Hz), 121.2 (q, <sup>1</sup> $J_{F-C}$  = 270.5 Hz), 37.6; IR (KBr): 2933, 1691, 1495, 1324, 1261, 1162, 1064 cm<sup>-1</sup>; HRMS (ESI, m/z): [M+H]<sup>+</sup> Calcd. for C<sub>14</sub>H<sub>17</sub>F<sub>3</sub>N<sub>4</sub>O<sub>2</sub>+H, 331.1376; found, 331.1373.

**(E)-N,N,N',N'-Tetramethyl-2-(4-(Methylsulfonyl)benzylidene)hydrazine-1,1-Dicarboxamide**

**(3i)**

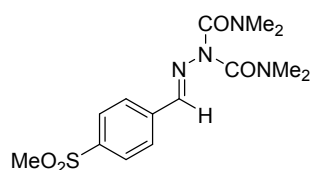

25.2 mg, 74% yield; viscous liquid; TLC (petroleum ether/ethyl acetate, 1:2 v/v):  $R_f$  = 0.17; <sup>1</sup>H NMR (400 MHz, CDCl<sub>3</sub>)  $\delta$  7.94 (d,  $J$  = 8.0 Hz, 2H), 7.89 (s, 1H), 7.82 (d,  $J$  = 8.0 Hz, 2H), 3.08 (s, 12H); <sup>13</sup>C NMR (100 MHz, CDCl<sub>3</sub>)  $\delta$  155.6, 142.9, 141.0, 139.8, 127.8, 127.6, 44.5, 37.6; IR (KBr): 2926, 2857, 1687, 1486, 1394, 1305, 1145, 1065 cm<sup>-1</sup>; HRMS (ESI, m/z): [M+Na]<sup>+</sup> Calcd. for C<sub>14</sub>H<sub>20</sub>N<sub>4</sub>O<sub>4</sub>S+Na, 363.1097; found, 363.1098.

**(E)-N,N,N',N'-Tetramethyl-2-(4-methylbenzylidene)hydrazine-1,1-Dicarboxamide (3j)**

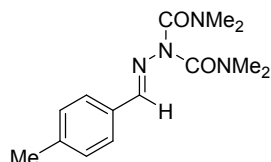

25.1 mg, 91% yield; viscous liquid; TLC (petroleum ether/ethyl acetate, 1:2 v/v):  $R_f$  = 0.42; <sup>1</sup>H NMR (400 MHz, CDCl<sub>3</sub>)  $\delta$  7.77 (s, 1H), 7.53 (s, 2H), 7.18 (s, 2H), 3.05–3.05 (m, 12H), 2.36 (s, 3H); <sup>13</sup>C NMR (100 MHz, CDCl<sub>3</sub>)  $\delta$  156.3, 146.1, 140.2, 131.8, 129.4, 127.1, 37.6, 21.4; IR (KBr): 2927, 1688, 1488, 1374, 1261, 1159, 1059 cm<sup>-1</sup>; HRMS (ESI, m/z): [M+H]<sup>+</sup> Calcd. for C<sub>14</sub>H<sub>20</sub>N<sub>4</sub>O<sub>2</sub>+H, 277.1659; found, 277.1656.

**(E)-N,N,N',N'-Tetramethyl-2-(2-methylbenzylidene)hydrazine-1,1-Dicarboxamide (3k)**

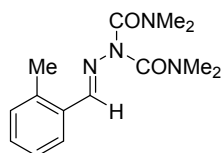

22.9 mg, 83% yield; viscous liquid; TLC (petroleum ether/ethyl acetate, 1:2 v/v):  $R_f = 0.42$ ;  $^1\text{H}$  NMR (400 MHz,  $\text{CDCl}_3$ )  $\delta$  8.09 (s, 1H), 7.80 (d,  $J = 7.6$  Hz, 1H), 7.16–7.28 (m, 3H), 3.06 (s, 12H), 2.43 (s, 3H);  $^{13}\text{C}$  NMR (100 MHz,  $\text{CDCl}_3$ )  $\delta$  156.4, 145.1, 137.0, 129.7, 126.2, 126.1, 37.6, 19.5; IR (KBr): 2929, 1687, 1487, 1376, 1262, 1158, 1060  $\text{cm}^{-1}$ ; HRMS (ESI,  $m/z$ ):  $[\text{M}+\text{H}]^+$  Calcd. for  $\text{C}_{14}\text{H}_{20}\text{N}_4\text{O}_2+\text{H}$ , 277.1659; found, 277.1660.

**(E)-2-(4-(*tert*-Butyl)benzylidene)-*N,N,N',N'*-Tetramethylhydrazine-1,1-Dicarboxamide (3l)**

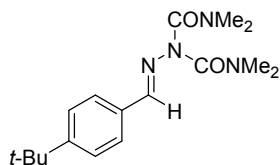

28.6 mg, 90% yield; viscous liquid; TLC (petroleum ether/ethyl acetate, 1:2 v/v):  $R_f = 0.41$ ;  $^1\text{H}$  NMR (400 MHz,  $\text{CDCl}_3$ )  $\delta$  7.77 (s, 1H), 7.59 (d,  $J = 8.0$  Hz, 2H), 7.40 (d,  $J = 8.4$  Hz, 2H), 3.06 (s, 12H), 1.33 (s, 9H);  $^{13}\text{C}$  NMR (100 MHz,  $\text{CDCl}_3$ )  $\delta$  156.3, 153.3, 145.8, 131.8, 126.9, 125.6, 37.7, 34.8, 31.2; IR (KBr): 2955, 1686, 1486, 1374, 1262, 1159, 1060  $\text{cm}^{-1}$ ; HRMS (ESI,  $m/z$ ):  $[\text{M}+\text{H}]^+$  Calcd. for  $\text{C}_{17}\text{H}_{26}\text{N}_4\text{O}_2+\text{H}$ , 319.2129; found, 319.2128.

**(E)-2-(4-Methoxybenzylidene)-*N,N,N',N'*-Tetramethylhydrazine-1,1-Dicarboxamide (3m)**

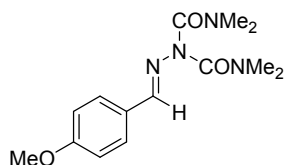

26.6 mg, 91% yield; viscous liquid; TLC (petroleum ether/ethyl acetate, 1:2 v/v):  $R_f = 0.40$ ;  $^1\text{H}$  NMR (400 MHz,  $\text{CDCl}_3$ )  $\delta$  7.76 (s, 1H), 7.59 (d,  $J = 8.8$  Hz, 2H), 6.90 (d,  $J = 8.4$  Hz, 2H), 3.83 (s, 3H), 3.06 (s, 12H);  $^{13}\text{C}$  NMR (100 MHz,  $\text{CDCl}_3$ )  $\delta$  161.1, 156.5, 146.2, 128.7, 127.3, 114.1, 55.3, 37.6; IR (KBr): 2925, 2854, 1682, 1606, 1497, 1377, 1252, 1161, 1029  $\text{cm}^{-1}$ ; HRMS (ESI,  $m/z$ ):  $[\text{M}+\text{H}]^+$  Calcd. for  $\text{C}_{14}\text{H}_{20}\text{N}_4\text{O}_3+\text{H}$ , 293.1608; found, 293.1608.

**(E)-2-(2,4-Dimethylbenzylidene)-*N,N,N',N'*-Tetramethylhydrazine-1,1-Dicarboxamide (3n)**

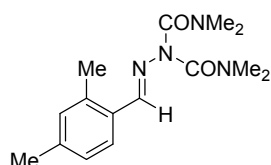

23.2 mg, 80% yield; yellow solid, mp: 135–136 °C; TLC (petroleum ether/ethyl acetate, 1:2 v/v):  $R_f$  = 0.42;  $^1\text{H NMR}$  (400 MHz,  $\text{CDCl}_3$ )  $\delta$  8.05 (s, 1H), 7.69 (d,  $J$  = 8.0 Hz, 1H), 7.02 (d,  $J$  = 8.0 Hz, 1H), 6.98 (s, 1H), 3.05 (s, 12H), 2.40 (s, 3H), 2.32 (s, 3H);  $^{13}\text{C NMR}$  (100 MHz,  $\text{CDCl}_3$ )  $\delta$  156.5, 145.5, 139.8, 136.9, 131.6, 129.8, 127.0, 126.3, 37.6, 21.3, 19.5; IR (KBr): 2930, 1680, 1497, 1376, 1262, 1158, 1059  $\text{cm}^{-1}$ ; HRMS (ESI,  $m/z$ ):  $[\text{M}+\text{H}]^+$  Calcd. for  $\text{C}_{15}\text{H}_{22}\text{N}_4\text{O}_2+\text{H}$ , 291.1816; found, 291.1813.

**(E)-2-(4-Bromo-2-Methoxybenzylidene)-N,N',N''-Tetramethylhydrazine-1,1-Dicarboxamide (3o)**

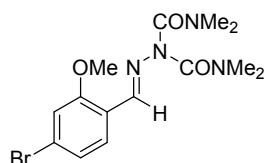

30.2 mg, 83% yield; yellow solid, mp: 99–100 °C; TLC (petroleum ether/ethyl acetate, 1:2 v/v):  $R_f$  = 0.41;  $^1\text{H NMR}$  (400 MHz,  $\text{CDCl}_3$ )  $\delta$  8.09 (s, 1H), 7.98 (s, 1H), 7.41 (d,  $J$  = 8.8 Hz, 1H), 6.77 (d,  $J$  = 8.8 Hz, 1H), 3.81 (s, 3H), 3.05 (s, 12H);  $^{13}\text{C NMR}$  (100 MHz,  $\text{CDCl}_3$ )  $\delta$  157.0, 156.2, 140.7, 133.5, 128.4, 124.9, 113.4, 112.9, 55.8, 37.6; IR (KBr): 2934, 1682, 1483, 1376, 1262, 1161, 1062  $\text{cm}^{-1}$ ; HRMS (ESI,  $m/z$ ):  $[\text{M}+\text{H}]^+$  Calcd. for  $\text{C}_{14}\text{H}_{19}\text{BrN}_4\text{O}_3+\text{H}$ , 371.0713; found, 371.0711.

**(E)-2-(2,6-Dimethylbenzylidene)-N,N',N''-Tetramethylhydrazine-1,1-Dicarboxamide (3p)**

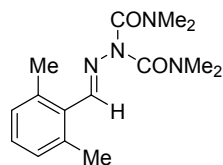

22.0 mg, 76% yield; yellow solid, mp: 110–111 °C; TLC (petroleum ether/ethyl acetate, 1:2 v/v):  $R_f$  = 0.41;  $^1\text{H NMR}$  (400 MHz,  $\text{CDCl}_3$ )  $\delta$  8.14 (s, 1H), 7.12–7.16 (m, 1H), 7.03–7.05 (m, 2H), 3.05 (s, 12H), 2.43 (s, 6H);  $^{13}\text{C NMR}$  (100 MHz,  $\text{CDCl}_3$ )  $\delta$  156.7, 148.4, 137.4, 131.7, 128.8, 128.4, 37.6, 21.0; IR (KBr): 2930, 1681, 1483, 1379, 1262, 1156, 1061  $\text{cm}^{-1}$ ; HRMS (ESI,  $m/z$ ):  $[\text{M}+\text{H}]^+$  Calcd. for  $\text{C}_{15}\text{H}_{22}\text{N}_4\text{O}_2+\text{H}$ , 291.1816; found, 291.1817.



**(E)-N,N,N',N'-Tetramethyl-2-(2,4,6-Trimethylbenzylidene)hydrazine-1,1-Dicarboxamide (3q)**

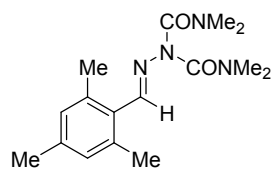

22.5 mg, 74% yield; yellow solid, mp: 151–152 °C; TLC (petroleum ether/ethyl acetate, 1:2 v/v):  $R_f = 0.43$ ;  $^1\text{H NMR}$  (400 MHz,  $\text{CDCl}_3$ )  $\delta$  8.13 (s, 1H), 6.88 (s, 2H), 3.05 (s, 12H), 2.41 (s, 6H), 2.29 (s, 3H);  $^{13}\text{C NMR}$  (100 MHz,  $\text{CDCl}_3$ )  $\delta$  156.8, 148.4, 138.8, 137.5, 129.4, 128.7, 37.6, 21.0; IR (KBr): 2928, 1679, 1486, 1378, 1262, 1156, 1059  $\text{cm}^{-1}$ ; HRMS (ESI, m/z):  $[\text{M}+\text{H}]^+$  Calcd. for  $\text{C}_{16}\text{H}_{24}\text{N}_4\text{O}_2+\text{H}$ , 305.1972; found, 305.1974.

**(E)-N'-Benzylidene-N-(Piperidine-1-Carbonyl)piperidine-1-Carbohydrazide (3r)**

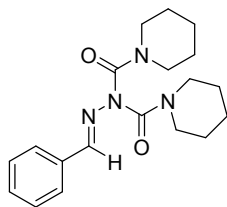

30.4 mg, 89% yield; yellow solid, mp: 127–128 °C; TLC (petroleum ether/ethyl acetate, 1:1 v/v):  $R_f = 0.37$ ;  $^1\text{H NMR}$  (400 MHz,  $\text{CDCl}_3$ )  $\delta$  7.76 (s, 1H), 7.63–7.65 (s, 2H), 7.37–7.38 (s, 3H), 3.54 (s, 9H), 1.65 (s, 13H);  $^{13}\text{C NMR}$  (100 MHz,  $\text{CDCl}_3$ )  $\delta$  155.1, 144.8, 134.6, 129.8, 128.7, 127.1, 46.6, 25.8, 24.4; IR (KBr): 2934, 2857, 1680, 1426, 1259, 1145, 1017  $\text{cm}^{-1}$ ; HRMS (ESI, m/z):  $[\text{M}+\text{H}]^+$  Calcd. for  $\text{C}_{19}\text{H}_{26}\text{N}_4\text{O}_2+\text{H}$ , 343.2129; found, 343.2127.

**(E)-N,N,N',N'-Tetramethyl-2-(1-Phenylethylidene)hydrazine-1,1-Dicarboxamide (5a)**

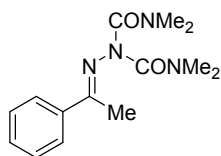

24.8 mg, 90% yield; white solid, mp: 161–162 °C; TLC (petroleum ether/ethyl acetate, 1:2 v/v):  $R_f = 0.23$ ;  $^1\text{H NMR}$  (400 MHz,  $\text{CDCl}_3$ )  $\delta$  7.81–7.83 (m, 2H), 7.37–7.39 (m, 3H), 3.01 (s, 12H), 2.16 (s, 3H);  $^{13}\text{C NMR}$  (100 MHz,  $\text{CDCl}_3$ )  $\delta$  163.6, 157.8, 137.6, 130.0, 128.3, 126.7, 37.3, 16.9; IR (KBr): 2929, 1677, 1488, 1378, 1265, 1177, 1067  $\text{cm}^{-1}$ ; HRMS (ESI, m/z):  $[\text{M}+\text{H}]^+$  Calcd. for  $\text{C}_{14}\text{H}_{20}\text{N}_4\text{O}_2+\text{H}$ , 277.1659; found, 277.1658.

**(E)-N,N,N',N'-Tetramethyl-2-(1-(p-tolyl)ethylidene)hydrazine-1,1-Dicarboxamide (5b)**

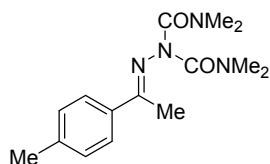

26.1 mg, 90% yield; viscous liquid; TLC (petroleum ether/ethyl acetate, 1:2 v/v):  $R_f = 0.23$ ;  $^1\text{H}$  NMR (400 MHz,  $\text{CDCl}_3$ )  $\delta$  7.72 (d,  $J = 8.4$  Hz, 2H), 7.18 (d,  $J = 8.0$  Hz, 2H), 3.00 (s, 12H), 2.37 (s, 3H), 2.14 (s, 3H);  $^{13}\text{C}$  NMR (100 MHz,  $\text{CDCl}_3$ )  $\delta$  163.9, 157.9, 140.2, 134.8, 129.0, 126.7, 37.3, 21.3, 16.8; IR (KBr): 2929, 1677, 1489, 1377, 1265, 1178, 1066  $\text{cm}^{-1}$ ; HRMS (ESI,  $m/z$ ):  $[\text{M}+\text{H}]^+$  Calcd. for  $\text{C}_{15}\text{H}_{22}\text{N}_4\text{O}_2+\text{H}$ , 291.1816; found, 291.1815.

**(E)-N,N,N',N'-Tetramethyl-2-(1-(*m*-tolyl)ethylidene)hydrazine-1,1-Dicarboxamide (5c)**

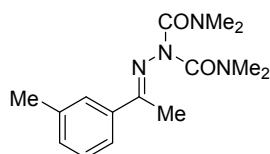

25.2 mg, 87% yield; white solid, mp: 104–105 °C; TLC (petroleum ether/ethyl acetate, 1:2 v/v):  $R_f = 0.23$ ;  $^1\text{H}$  NMR (400 MHz,  $\text{CDCl}_3$ )  $\delta$  7.64 (s, 1H), 7.58 (d,  $J = 7.6$  Hz, 1H), 7.21–7.27 (m, 2H), 3.00 (s, 12H), 2.38 (s, 3H), 2.15 (s, 3H);  $^{13}\text{C}$  NMR (100 MHz,  $\text{CDCl}_3$ )  $\delta$  164.2, 157.8, 137.9, 137.6, 130.8, 128.2, 127.4, 123.9, 37.3, 21.4, 17.1; IR (KBr): 2929, 1676, 1488, 1377, 1264, 1173, 1063  $\text{cm}^{-1}$ ; HRMS (ESI,  $m/z$ ):  $[\text{M}+\text{H}]^+$  Calcd. for  $\text{C}_{15}\text{H}_{22}\text{N}_4\text{O}_2+\text{H}$ , 291.1816; found, 291.1818.

**(E)-2-(1-(4-Methoxyphenyl)ethylidene)-N,N,N',N'-Tetramethylhydrazine-1,1-Dicarboxamide (5d)**

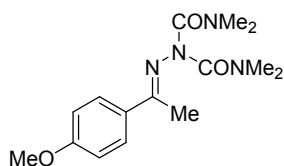

27.8 mg, 91% yield; viscous liquid; TLC (petroleum ether/ethyl acetate, 1:2 v/v):  $R_f = 0.22$ ;  $^1\text{H}$  NMR (400 MHz,  $\text{CDCl}_3$ )  $\delta$  7.79 (d,  $J = 8.8$  Hz, 2H), 6.89 (d,  $J = 8.8$  Hz, 2H), 3.82 (s, 3H), 2.99 (s, 12H), 2.13 (s, 3H);  $^{13}\text{C}$  NMR (100 MHz,  $\text{CDCl}_3$ )  $\delta$  163.8, 161.2, 158.0, 130.0, 128.3, 113.6, 55.3, 37.3, 16.6; IR (KBr): 2932, 2853, 1682, 1497, 1378, 1258, 1176, 1029  $\text{cm}^{-1}$ ; HRMS (ESI,  $m/z$ ):  $[\text{M}+\text{H}]^+$  Calcd. for  $\text{C}_{15}\text{H}_{22}\text{N}_4\text{O}_3+\text{H}$ , 307.1765; found, 307.1766.

**(E)-2-(1-(3-Methoxyphenyl)ethylidene)-N,N,N',N'-Tetramethylhydrazine-1,1-Dicarboxamide**

**(5e)**

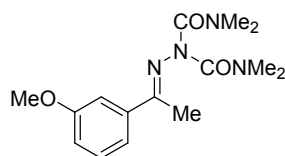

26.3 mg, 86% yield; white solid, mp: 112–113 °C; TLC (petroleum ether/ethyl acetate, 1:2 v/v):  $R_f$  = 0.22;  $^1\text{H}$  NMR (400 MHz,  $\text{CDCl}_3$ )  $\delta$  7.35–7.40 (m, 2H), 7.27–7.31 (m, 1H), 6.95 (dd,  $J$  = 0.8 Hz,  $J$  = 0.8 Hz, 1H), 3.83 (s, 3H), 3.00 (s, 12H), 2.15 (s, 3H);  $^{13}\text{C}$  NMR (100 MHz,  $\text{CDCl}_3$ )  $\delta$  163.7, 159.5, 157.8, 138.9, 129.2, 119.3, 115.8, 112.1, 55.4, 37.3, 17.1; IR (KBr): 2933, 1683, 1483, 1380, 1269, 1173, 1050  $\text{cm}^{-1}$ ; HRMS (ESI,  $m/z$ ):  $[\text{M}+\text{H}]^+$  Calcd. for  $\text{C}_{15}\text{H}_{22}\text{N}_4\text{O}_3+\text{H}$ , 307.1765; found, 307.1767.

**(E)-2-(1-(4-Methoxyphenyl)ethylidene)-N,N,N',N'-Tetramethylhydrazine-1,1-Dicarboxamide**

**(5f)**

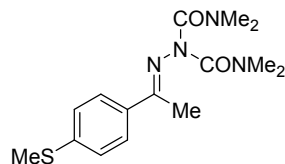

25.8 mg, 80% yield; yellow solid, mp: 170–171 °C; TLC (petroleum ether/ethyl acetate, 1:2 v/v):  $R_f$  = 0.21;  $^1\text{H}$  NMR (400 MHz,  $\text{CDCl}_3$ )  $\delta$  7.75 (d,  $J$  = 8.4 Hz, 2H), 7.22 (d,  $J$  = 8.4 Hz, 2H), 3.00 (s, 12H), 2.49 (s, 3H), 2.12 (s, 3H);  $^{13}\text{C}$  NMR (100 MHz,  $\text{CDCl}_3$ )  $\delta$  162.8, 157.8, 141.2, 134.1, 127.1, 125.6, 37.3, 16.6, 15.3; IR (KBr): 2927, 1681, 1488, 1378, 1264, 1177, 1067  $\text{cm}^{-1}$ ; HRMS (ESI,  $m/z$ ):  $[\text{M}+\text{H}]^+$  Calcd. for  $\text{C}_{15}\text{H}_{22}\text{N}_4\text{O}_2\text{S}+\text{H}$ , 323.1536; found, 323.1232.

**(E)-2-(1-(4-Bromophenyl)ethylidene)-N,N,N',N'-Tetramethylhydrazine-1,1-Dicarboxamide**

**(5g)**

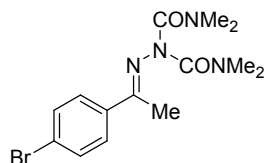

30.8 mg, 87% yield; white solid, mp: 173–174 °C; TLC (petroleum ether/ethyl acetate, 1:2 v/v):  $R_f$  = 0.23;  $^1\text{H}$  NMR (400 MHz,  $\text{CDCl}_3$ )  $\delta$  7.67–7.70 (m, 2H), 7.48–7.50 (m, 2H), 2.99 (s, 12H), 2.11 (s, 3H);  $^{13}\text{C}$  NMR (100 MHz,  $\text{CDCl}_3$ )  $\delta$  162.0, 157.6, 136.5, 131.4, 128.3, 124.4, 37.3, 16.7; IR (KBr): 2927, 1681, 1488, 1378, 1264, 1177, 1067  $\text{cm}^{-1}$ ; HRMS (ESI,  $m/z$ ):  $[\text{M}+\text{H}]^+$  Calcd. for

C<sub>14</sub>H<sub>19</sub>BrN<sub>4</sub>O<sub>2</sub>+H, 355.0764; found, 355.0767.

**(E)-2-(1-(3-Bromophenyl)ethylidene)-N,N,N',N'-Tetramethylhydrazine-1,1-Dicarboxamide**

**(5h)**

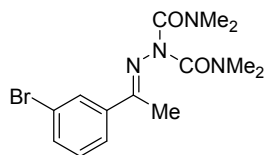

32.4 mg, 91% yield; white solid, mp: 171–172 °C; TLC (petroleum ether/ethyl acetate, 1:2 v/v): R<sub>f</sub> = 0.23; <sup>1</sup>H NMR (400 MHz, CDCl<sub>3</sub>) δ 7.98 (s, 1H), 7.72 (d, *J* = 7.6 Hz, 1H), 7.52 (d, *J* = 8.0 Hz, 1H), 7.26 (d, *J* = 8.4 Hz, 1H), 3.01 (s, 12H), 2.12 (s, 3H); <sup>13</sup>C NMR (100 MHz, CDCl<sub>3</sub>) δ 161.6, 157.5, 139.6, 132.8, 129.7, 125.4, 122.6, 37.3, 16.9; IR (KBr): 2931, 1680, 1487, 1377, 1264, 1173, 1065 cm<sup>-1</sup>; HRMS (ESI, *m/z*): [M+H]<sup>+</sup> Calcd. for C<sub>14</sub>H<sub>19</sub>BrN<sub>4</sub>O<sub>2</sub>+H, 355.0764; found, 355.0765.

**(E)-2-(1-(4-Chlorophenyl)ethylidene)-N,N,N',N'-Tetramethylhydrazine-1,1-Dicarboxamide**

**(5i)**

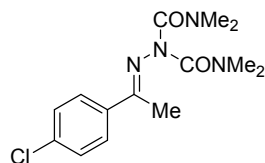

27.9 mg, 90% yield; white solid, mp: 167–168 °C; TLC (petroleum ether/ethyl acetate, 1:2 v/v): R<sub>f</sub> = 0.23; <sup>1</sup>H NMR (400 MHz, CDCl<sub>3</sub>) δ 7.76 (d, *J* = 8.4 Hz, 2H), 7.34 (d, *J* = 8.4 Hz, 2H), 3.00 (s, 12H), 2.13 (s, 3H); <sup>13</sup>C NMR (100 MHz, CDCl<sub>3</sub>) δ 162.0, 157.6, 136.0, 136.0, 128.5, 128.0, 37.3, 16.7; IR (KBr): 2932, 1683, 1488, 1378, 1264, 1176, 1089 cm<sup>-1</sup>; HRMS (ESI, *m/z*): [M+H]<sup>+</sup> Calcd. for C<sub>14</sub>H<sub>19</sub>ClN<sub>4</sub>O<sub>2</sub>+H, 311.1269; found, 311.1268.

**(E)-2-(1-(3-Chlorophenyl)ethylidene)-N,N,N',N'-Tetramethylhydrazine-1,1-Dicarboxamide**

**(5j)**

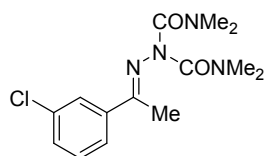

28.2 mg, 91% yield; white solid, mp: 156–157 °C; TLC (petroleum ether/ethyl acetate, 1:2 v/v): R<sub>f</sub>

= 0.23;  $^1\text{H}$  NMR (400 MHz,  $\text{CDCl}_3$ )  $\delta$  7.82–7.83 (m, 1H), 7.68 (d,  $J = 7.6$  Hz, 1H), 7.37 (d,  $J = 8.0$  Hz, 1H), 7.31 (t,  $J = 8.0$  Hz, 1H), 3.01 (s, 12H), 2.13 (s, 3H);  $^{13}\text{C}$  NMR (100 MHz,  $\text{CDCl}_3$ )  $\delta$  161.6, 157.5, 139.4, 134.4, 129.9, 129.5, 126.8, 124.9, 37.3, 16.9; IR (KBr): 2929, 1681, 1487, 1377, 1264, 1174, 1066  $\text{cm}^{-1}$ ; HRMS (ESI,  $m/z$ ):  $[\text{M}+\text{H}]^+$  Calcd. for  $\text{C}_{14}\text{H}_{19}\text{ClN}_4\text{O}_2+\text{H}$ , 311.1269; found, 311.1267.

**(E)-2-(1-(4-Fluorophenyl)ethylidene)-N,N,N',N'-Tetramethylhydrazine-1,1-Dicarboxamide**

**(5k)**

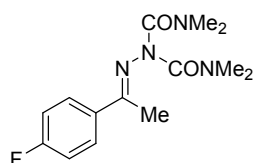

25.6 mg, 87% yield; white solid, mp: 137–138  $^{\circ}\text{C}$ ; TLC (petroleum ether/ethyl acetate, 1:2 v/v):  $R_f = 0.23$ ;  $^1\text{H}$  NMR (400 MHz,  $\text{CDCl}_3$ )  $\delta$  7.80–7.84 (m, 2H), 7.05 (t,  $J = 8.8$  Hz, 2H), 3.00 (s, 12H), 2.14 (s, 3H);  $^{13}\text{C}$  NMR (100 MHz,  $\text{CDCl}_3$ )  $\delta$  163.9 (d,  $^1J_{\text{F-C}} = 248.3$  Hz), 162.3, 157.7, 133.7 (d,  $^4J_{\text{F-C}} = 3.3$  Hz), 128.7 (d,  $^3J_{\text{F-C}} = 8.4$  Hz), 115.2 (d,  $^2J_{\text{F-C}} = 21.7$  Hz), 37.6, 16.8; IR (KBr): 2929, 1680, 1495, 1378, 1264, 1165, 1070  $\text{cm}^{-1}$ ; HRMS (ESI,  $m/z$ ):  $[\text{M}+\text{H}]^+$  Calcd. for  $\text{C}_{14}\text{H}_{19}\text{FN}_4\text{O}_2+\text{H}$ , 295.1565; found, 295.1562.

**(E)-2-(1-(3-Fluorophenyl)ethylidene)-N,N,N',N'-Tetramethylhydrazine-1,1-Dicarboxamide**

**(5l)**

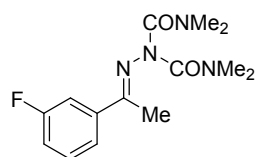

24.4 mg, 83% yield; yellow solid, mp: 139–140  $^{\circ}\text{C}$ ; TLC (petroleum ether/ethyl acetate, 1:2 v/v):  $R_f = 0.24$ ;  $^1\text{H}$  NMR (400 MHz,  $\text{CDCl}_3$ )  $\delta$  7.56 (d,  $J = 8.4$  Hz, 2H), 7.34 (q,  $J = 7.2$  Hz, 1H), 7.09 (t,  $J = 8.0$  Hz, 1H), 3.00 (s, 12H), 2.13 (s, 3H);  $^{13}\text{C}$  NMR (100 MHz,  $\text{CDCl}_3$ )  $\delta$  162.7 (d,  $^1J_{\text{F-C}} = 243.9$  Hz), 161.6 (d,  $^7J_{\text{F-C}} = 2.3$  Hz), 157.6, 139.9 (d,  $^3J_{\text{F-C}} = 7.5$  Hz), 129.8 (d,  $^3J_{\text{F-C}} = 8.1$  Hz), 122.5 (d,  $^4J_{\text{F-C}} = 2.8$  Hz), 116.7 (d,  $^4J_{\text{F-C}} = 2.3$  Hz), 113.5 (d,  $^2J_{\text{F-C}} = 22.9$  Hz), 37.3, 16.9; IR (KBr): 2931, 1680, 1487, 1378, 1264, 1170, 1068  $\text{cm}^{-1}$ ; HRMS (ESI,  $m/z$ ):  $[\text{M}+\text{H}]^+$  Calcd. for  $\text{C}_{14}\text{H}_{19}\text{FN}_4\text{O}_2+\text{H}$ , 295.1565; found, 295.1566.

**(E)-2-(1-(4-Iodophenyl)ethylidene)-N,N,N',N'-Tetramethylhydrazine-1,1-Dicarboxamide**

**(5m)**

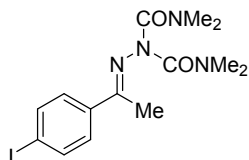

32.6 mg, 81% yield; white solid, mp: 184–185 °C; TLC (petroleum ether/ethyl acetate, 1:2 v/v):  $R_f$  = 0.23;  $^1\text{H}$  NMR (400 MHz,  $\text{CDCl}_3$ )  $\delta$  7.71 (d,  $J$  = 8.0 Hz, 2H), 7.55 (d,  $J$  = 8.4 Hz, 2H), 3.00 (s, 12H), 2.11 (s, 3H);  $^{13}\text{C}$  NMR (100 MHz,  $\text{CDCl}_3$ )  $\delta$  162.0, 157.6, 137.4, 137.1, 128.4, 96.5, 37.3, 16.6; IR (KBr): 2928, 1680, 1486, 1380, 1264, 1174, 1071  $\text{cm}^{-1}$ ; HRMS (ESI,  $m/z$ ):  $[\text{M}+\text{H}]^+$  Calcd. for  $\text{C}_{14}\text{H}_{19}\text{IN}_4\text{O}_2+\text{H}$ , 403.0626; found, 403.0631.

**(E)-2-(1-(4-Cyanophenyl)ethylidene)-N,N,N',N'-Tetramethylhydrazine-1,1-Dicarboxamide**

**(5n)**

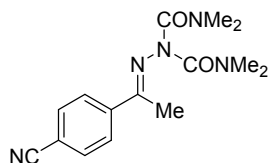

24.4 mg, 81% yield; white solid, mp: 193–194 °C; TLC (petroleum ether/ethyl acetate, 1:2 v/v):  $R_f$  = 0.23;  $^1\text{H}$  NMR (400 MHz,  $\text{CDCl}_3$ )  $\delta$  7.92 (d,  $J$  = 7.6 Hz, 2H), 7.66 (d,  $J$  = 8.0 Hz, 2H), 3.01 (s, 12H), 2.15 (s, 3H);  $^{13}\text{C}$  NMR (100 MHz,  $\text{CDCl}_3$ )  $\delta$  160.4, 157.3, 141.7, 132.1, 127.2, 118.6, 113.2, 37.3, 18.6; IR (KBr): 2928, 1681, 1489, 1379, 1264, 1174, 1073  $\text{cm}^{-1}$ ; HRMS (ESI,  $m/z$ ):  $[\text{M}+\text{H}]^+$  Calcd. for  $\text{C}_{15}\text{H}_{19}\text{N}_5\text{O}_2+\text{H}$ , 302.1612; found, 302.1609.

**Methyl (E)-4-(1-(2,2-Bis(dimethylcarbamoyl)hydrazono)ethyl)benzoate (5o)**

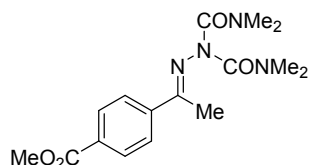

30.1 mg, 90% yield; yellow solid, mp: 162–163 °C; TLC (petroleum ether/ethyl acetate, 1:2 v/v):  $R_f$  = 0.20;  $^1\text{H}$  NMR (400 MHz,  $\text{CDCl}_3$ )  $\delta$  8.04 (d,  $J$  = 8.4 Hz, 2H), 7.88 (d,  $J$  = 8.0 Hz, 2H), 3.93 (s, 3H), 3.02 (s, 12H), 2.17 (s, 3H);  $^{13}\text{C}$  NMR (100 MHz,  $\text{CDCl}_3$ )  $\delta$  166.6, 161.8, 157.5, 141.7, 131.1,

129.5, 126.6, 52.2, 37.3, 17.0; IR (KBr): 2933, 1683, 1490, 1379, 1277, 1180, 1110  $\text{cm}^{-1}$ ; HRMS (ESI,  $m/z$ ):  $[M+H]^+$  Calcd. for  $\text{C}_{16}\text{H}_{22}\text{N}_4\text{O}_4+\text{H}$ , 335.1714; found, 335.1714.

**(E)-N,N,N',N'-Tetramethyl-2-(1-(4-(Trifluoromethyl)phenyl)ethylidene)hydrazine-1,1-Dicarboxamide (5p)**

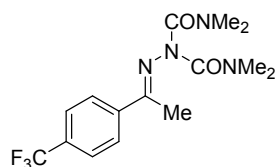

29.9 mg, 87% yield; yellow solid, mp: 176–177  $^{\circ}\text{C}$ ; TLC (petroleum ether/ethyl acetate, 1:2 v/v):  $R_f$  = 0.24;  $^1\text{H}$  NMR (400 MHz,  $\text{CDCl}_3$ )  $\delta$  7.93 (d,  $J$  = 8.0 Hz, 2H), 7.63 (d,  $J$  = 8.0 Hz, 2H), 3.01 (s, 12H), 2.17 (s, 3H);  $^{13}\text{C}$  NMR (100 MHz,  $\text{CDCl}_3$ )  $\delta$  161.3, 157.5, 141.0, 131.5 (q,  $^2J_{\text{F-C}}$  = 31.4 Hz), 127.0, 125.2 (q,  $^3J_{\text{F-C}}$  = 3.7 Hz), 124.0 (q,  $^1J_{\text{F-C}}$  = 270.4 Hz), 37.3, 16.9; IR (KBr): 2937, 1681, 1485, 1390, 1265, 1166, 1116, 1068  $\text{cm}^{-1}$ ; HRMS (ESI,  $m/z$ ):  $[M+H]^+$  Calcd. for  $\text{C}_{15}\text{H}_{19}\text{F}_3\text{N}_4\text{O}_2+\text{H}$ , 345.1533; found, 345.1536.

**(E)-N,N,N',N'-Tetramethyl-2-(1-(4-(Methylsulfonyl)phenyl)ethylidene)hydrazine-1,1-Dicarboxamide (5q)**

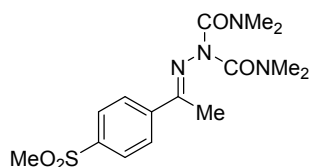

20.2 mg, 57% yield; white solid, mp: 197–198  $^{\circ}\text{C}$ ; TLC (petroleum ether/ethyl acetate, 1:2 v/v):  $R_f$  = 0.15;  $^1\text{H}$  NMR (400 MHz,  $\text{CDCl}_3$ )  $\delta$  7.93–8.01 (m, 4H), 3.05 (s, 3H), 3.02 (s, 12H), 2.18 (s, 3H);  $^{13}\text{C}$  NMR (100 MHz,  $\text{CDCl}_3$ )  $\delta$  160.5, 157.3, 142.7, 141.3, 127.6, 127.4, 44.5, 37.3, 17.0; IR (KBr): 2930, 1680, 1489, 1383, 1307, 1155, 1082  $\text{cm}^{-1}$ ; HRMS (ESI,  $m/z$ ):  $[M+H]^+$  Calcd. for  $\text{C}_{15}\text{H}_{22}\text{N}_4\text{O}_4\text{S}+\text{H}$ , 355.1435; found, 355.1434.

**(E)-N,N,N',N'-Tetramethyl-2-(1-(4-Nitrophenyl)ethylidene)hydrazine-1,1-Dicarboxamide (5r)**

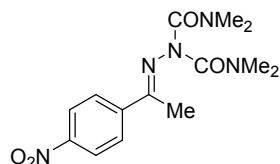

19.6 mg, 61% yield; yellow solid, mp: 197–198 °C; TLC (petroleum ether/ethyl acetate, 1:2 v/v):  $R_f$  = 0.20;  $^1\text{H NMR}$  (400 MHz,  $\text{CDCl}_3$ )  $\delta$  8.21 (d,  $J$  = 7.2 Hz, 2H), 7.99 (d,  $J$  = 7.2 Hz, 2H), 3.03 (s, 12H), 2.19 (s, 3H);  $^{13}\text{C NMR}$  (100 MHz,  $\text{CDCl}_3$ )  $\delta$  160.0, 157.3, 148.5, 143.5, 127.5, 123.5, 37.3, 17.0; IR (KBr): 2933, 1670, 1503, 1384, 1264, 1172, 1070  $\text{cm}^{-1}$ ; HRMS (ESI,  $m/z$ ):  $[\text{M}+\text{H}]^+$  Calcd. for  $\text{C}_{14}\text{H}_{19}\text{N}_5\text{O}_4+\text{H}$ , 322.1510; found, 322.1511.

**(E)-2-(1-(3,4-Dichlorophenyl)ethylidene)-N,N,N',N'-Tetramethylhydrazine-1,1-Dicarboxamide (5s)**

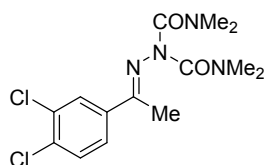

31.3 mg, 91% yield; white solid, mp: 199–200 °C; TLC (petroleum ether/ethyl acetate, 1:2 v/v):  $R_f$  = 0.23;  $^1\text{H NMR}$  (400 MHz,  $\text{CDCl}_3$ )  $\delta$  7.93 (s, 1H), 7.64 (d,  $J$  = 8.0 Hz, 1H), 7.44 (d,  $J$  = 8.0 Hz, 1H), 3.00 (s, 12H), 2.11 (s, 3H);  $^{13}\text{C NMR}$  (100 MHz,  $\text{CDCl}_3$ )  $\delta$  160.5, 157.4, 137.5, 134.0, 132.6, 130.2, 128.6, 125.9, 37.3, 16.7; IR (KBr): 2927, 1678, 1452, 1377, 1261, 1177, 1067  $\text{cm}^{-1}$ ; HRMS (ESI,  $m/z$ ):  $[\text{M}+\text{Na}]^+$  Calcd. for  $\text{C}_{14}\text{H}_{18}\text{Cl}_2\text{N}_4\text{O}_2+\text{Na}$ , 367.0699; found, 367.0696.

**(E)-N,N,N',N'-Tetramethyl-2-(1-(Naphthalen-2-yl)ethylidene)hydrazine-1,1-Dicarboxamide (5t)**

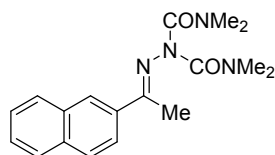

29.3 mg, 90% yield; white solid, mp: 179–180 °C; TLC (petroleum ether/ethyl acetate, 1:2 v/v):  $R_f$  = 0.23;  $^1\text{H NMR}$  (400 MHz,  $\text{CDCl}_3$ )  $\delta$  8.16 (s, 1H), 8.07 (d,  $J$  = 8.8 Hz, 1H), 7.79–7.87 (m, 3H), 7.47–7.48 (m, 2H), 3.01 (s, 12H), 2.26 (s, 3H);  $^{13}\text{C NMR}$  (100 MHz,  $\text{CDCl}_3$ )  $\delta$  163.2, 157.8, 135.1, 134.1, 132.9, 128.7, 127.8, 127.6, 127.0, 127.0, 126.3, 123.9, 37.4, 16.8; IR (KBr): 2930, 1681, 1488, 1377, 1264, 1175, 1067  $\text{cm}^{-1}$ ; HRMS (ESI,  $m/z$ ):  $[\text{M}+\text{H}]^+$  Calcd. for  $\text{C}_{18}\text{H}_{22}\text{N}_4\text{O}_2+\text{H}$ ,



327.1816; found, 327.1814.

**(E)-N,N,N',N'-Tetramethyl-2-(1-(Thiophen-2-yl)ethylidene)hydrazine-1,1-Dicarboxamide**

**(5u)**

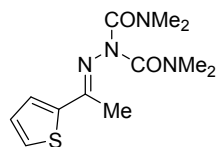

14.9 mg, 53% yield; viscous liquid; TLC (petroleum ether/ethyl acetate, 1:2 v/v):  $R_f = 0.17$ ;  $^1\text{H}$  NMR (400 MHz,  $\text{CDCl}_3$ )  $\delta$  7.34–7.36 (m, 2H), 7.03 (t,  $J = 4.4$  Hz, 1H), 3.00 (s, 12H), 1.61 (s, 3H);  $^{13}\text{C}$  NMR (100 MHz,  $\text{CDCl}_3$ )  $\delta$  158.1, 157.5, 142.7, 128.7, 127.7, 127.1, 37.4, 16.7; IR (KBr): 2925, 1681, 1488, 1373, 1264, 1172, 1062  $\text{cm}^{-1}$ ; HRMS (ESI, m/z):  $[\text{M}+\text{H}]^+$  Calcd. for  $\text{C}_{12}\text{H}_{18}\text{N}_4\text{O}_2\text{S}+\text{H}$ , 283.1223; found, 283.1226.

**(E)-N,N,N',N'-Tetramethyl-2-(1-Phenylpropylidene)hydrazine-1,1-Dicarboxamide (5v)**

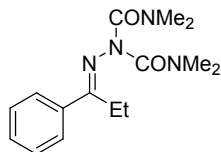

22.1 mg, 76% yield; viscous liquid; TLC (petroleum ether/ethyl acetate, 1:2 v/v):  $R_f = 0.23$ ;  $^1\text{H}$  NMR (400 MHz,  $\text{CDCl}_3$ )  $\delta$  7.71–7.74 (m, 2H), 7.38–7.40 (m, 3H), 3.00 (s, 12H), 2.60 (q,  $J = 7.6$  Hz, 2H), 1.05 (t,  $J = 7.6$  Hz, 3H);  $^{13}\text{C}$  NMR (100 MHz,  $\text{CDCl}_3$ )  $\delta$  169.7, 158.3, 136.3, 129.8, 128.3, 127.3, 37.3, 23.3, 10.1; IR (KBr): 2930, 1678, 1488, 1378, 1265, 1183, 1060  $\text{cm}^{-1}$ ; HRMS (ESI, m/z):  $[\text{M}+\text{H}]^+$  Calcd. for  $\text{C}_{15}\text{H}_{22}\text{N}_4\text{O}_2+\text{H}$ , 291.1816; found, 291.1816.

**(E)-N,N,N',N'-Tetramethyl-2-(1-Phenylbutylidene)hydrazine-1,1-Dicarboxamide (5w)**

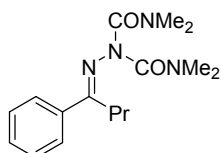

24.3 mg, 80% yield; viscous liquid; TLC (petroleum ether/ethyl acetate, 1:2 v/v):  $R_f = 0.31$ ;  $^1\text{H}$  NMR (400 MHz,  $\text{CDCl}_3$ )  $\delta$  7.69–7.71 (m, 2H), 7.34–7.39 (m, 3H), 3.01 (s, 12H), 2.54 (t,  $J = 7.6$  Hz, 2H), 1.45–1.52 (m, 2H), 0.90 (t,  $J = 7.6$  Hz, 3H);  $^{13}\text{C}$  NMR (100 MHz,  $\text{CDCl}_3$ )  $\delta$  168.6, 158.3, 136.8, 129.7, 128.33, 127.2, 37.3, 32.5, 19.1, 14.5; IR (KBr): 2934, 1680, 1488, 1379, 1268, 1188,

1061  $\text{cm}^{-1}$ ; HRMS (ESI,  $m/z$ ):  $[\text{M}+\text{H}]^+$  Calcd. for  $\text{C}_{16}\text{H}_{24}\text{N}_4\text{O}_2+\text{H}$ , 305.1972; found, 305.1973.

**(E)-2-(3,4-Dihydronaphthalen-1(2H)-ylidene)-N,N,N',N'-Tetramethylhydrazine-1,1-**

**Dicarboxamide (5x)**

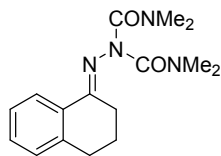

22.3 mg, 74% yield; white solid, mp: 165–166 °C; TLC (petroleum ether/ethyl acetate, 1:2 v/v):  $R_f$  = 0.23;  $^1\text{H}$  NMR (400 MHz,  $\text{CDCl}_3$ )  $\delta$  8.25 (d,  $J$  = 8.0 Hz, 1H), 7.29 (t,  $J$  = 8.0 Hz, 1H), 7.20 (t,  $J$  = 7.6 Hz, 1H), 7.13 (d,  $J$  = 7.6 Hz, 1H), 2.99 (s, 12H), 2.83 (t,  $J$  = 6.0 Hz, 2H), 2.25 (t,  $J$  = 6.4 Hz, 2H), 1.90 (quint,  $J$  = 6.0 Hz, 2H);  $^{13}\text{C}$  NMR (100 MHz,  $\text{CDCl}_3$ )  $\delta$  162.6, 157.9, 140.3, 131.9, 130.1, 128.6, 126.3, 125.9, 37.4, 29.6, 28.4, 22.3; IR (KBr): 2934, 1680, 1488, 1377, 1264, 1180, 1061  $\text{cm}^{-1}$ ; HRMS (ESI,  $m/z$ ):  $[\text{M}+\text{H}]^+$  Calcd. for  $\text{C}_{16}\text{H}_{22}\text{N}_4\text{O}_2+\text{H}$ , 303.1816; found, 303.1814.

**(E)-N,N,N',N'-Tetramethyl-2-(6,7,8,9-Tetrahydro-5H-Benzo[7]annulen-5-ylidene)hydrazine-1,1-Dicarboxamide (5y)**

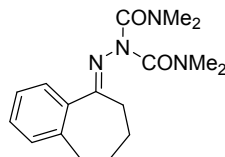

16.1 mg, 51% yield; viscous liquid; TLC (petroleum ether/ethyl acetate, 1:3 v/v):  $R_f$  = 0.17;  $^1\text{H}$  NMR (400 MHz,  $\text{CDCl}_3$ )  $\delta$  7.62 (d,  $J$  = 7.6 Hz, 1H), 7.31 (t,  $J$  = 7.2 Hz, 1H), 7.24 (t,  $J$  = 7.6 Hz, 1H), 7.11 (d,  $J$  = 7.6 Hz, 1H), 2.99 (s, 12H), 2.76 (t,  $J$  = 6.4 Hz, 2H), 2.45 (t,  $J$  = 5.6 Hz, 2H), 1.74–1.79 (m, 2H), 1.61 (quint,  $J$  = 6.0 Hz, 2H);  $^{13}\text{C}$  NMR (100 MHz,  $\text{CDCl}_3$ )  $\delta$  172.5, 157.9, 139.1, 137.6, 129.8, 128.6, 127.8, 126.5, 37.3, 30.2, 25.9, 21.3; IR (KBr): 2930, 2861, 1677, 1486, 1376, 1264, 1172, 1062  $\text{cm}^{-1}$ ; HRMS (ESI,  $m/z$ ):  $[\text{M}+\text{H}]^+$  Calcd. for  $\text{C}_{17}\text{H}_{24}\text{N}_4\text{O}_2+\text{H}$ , 317.1971; found, 317.1971.

**(E)-N'-(1-Phenylethylidene)-N-(Piperidine-1-Carbonyl)piperidine-1-Carbohydrazide (5z)**

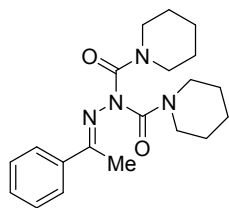

31.7 mg, 89% yield; viscous liquid; TLC (petroleum ether/ethyl acetate, 1:1 v/v):  $R_f = 0.41$ ;  $^1\text{H}$  NMR (400 MHz,  $\text{CDCl}_3$ )  $\delta$  7.81–7.84 (m, 2H), 7.37–7.33 (m, 3H), 3.47 (brs, 9H), 2.18 (s, 3H), 1.61 (brs, 13H);  $^{13}\text{C}$  NMR (100 MHz,  $\text{CDCl}_3$ )  $\delta$  162.3, 156.9, 137.8, 129.8, 128.2, 126.7, 46.1, 25.8, 24.5, 16.8; IR (KBr): 2934, 2856, 1679, 1425, 1225, 1145, 1022  $\text{cm}^{-1}$ ; HRMS (ESI,  $m/z$ ):  $[\text{M}+\text{H}]^+$  Calcd. for  $\text{C}_{20}\text{H}_{28}\text{N}_4\text{O}_2+\text{H}$ , 357.2285; found, 357.2283.

#### D. Procedure for the Gram-Scale Synthesis of 3a, 5a and 5g

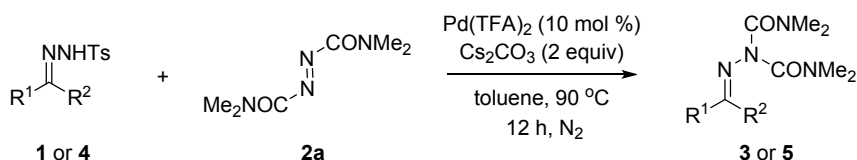

A 250 mL round bottom flask placed with a magnetic stirring bar, *N*-tosylhydrazones (10 mmol),  $\text{Pd}(\text{TFA})_2$  (10 mol %),  $\text{Cs}_2\text{CO}_3$  (10 mmol), toluene (100 mL), and azo compound **2a** (5 mmol) was vigorously stirred at 90 °C for 12 h under  $\text{N}_2$  in an oil bath. Then the resulting solution was cooled to room temperature, added water (100 mL), extracted with EtOAc ( $3 \times 100$  mL). The combined organic phases were dried over anhydrous  $\text{Na}_2\text{SO}_4$ , filtered and concentrated *in vacuo*. Further purification by flash column chromatography on silica gel (eluting with petroleum ether/ethyl acetate) provided the pure product **3a** (87%, 1.14 g), **5a** (85%, 1.17 g), and **5g** (89%, 1.58 g).

#### E. Procedure for the Synthesis of Chiral Hydrozones

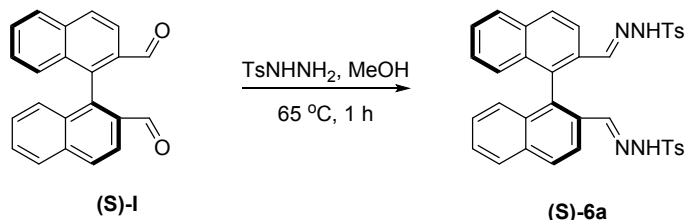

A 50 mL round bottom flask placed with a magnetic stirring bar, aldehyde (*S*)-**I** (1.55 g, 5 mmol),  $\text{TsNHNH}_2$  (2.23 g, 12 mmol), and MeOH (10 mL) was vigorously stirred at 65 °C for 1 h in an oil bath. Then the resulting solution was cooled to room temperature, concentrated *in vacuo*. Further

purification by flash column chromatography on silica gel (eluting with petroleum ether/ethyl acetate) provided the pure product (*S*)-**6a**.

3.17 g, 98% yield; yellow solid, mp > 180 °C (decomposed);  $[\alpha]_D^{20} = 4.9$  (*c* 0.143, CH<sub>2</sub>Cl<sub>2</sub>); TLC (petroleum ether/ethyl acetate, 3:1 v/v):  $R_f = 0.40$ ; <sup>1</sup>H NMR (400 MHz, CDCl<sub>3</sub>) δ 8.10 (d, *J* = 8.8 Hz, 2H), 7.89 (d, *J* = 8.8 Hz, 2H), 7.84 (d, *J* = 8.4 Hz, 2H), 7.41 (t, *J* = 7.6 Hz, 2H), 7.24–7.26 (m, 4H), 7.08–7.12 (m, 4H), 6.89 (d, *J* = 8.4 Hz, 2H), 2.38 (s, 6H); <sup>13</sup>C NMR (100 MHz, CDCl<sub>3</sub>) δ 145.0, 144.2, 135.2, 134.8, 134.1, 132.9, 130.8, 129.7, 129.1, 127.9, 127.2, 126.6, 122.5, 21.6; IR (KBr): 3034, 2949, 2871, 1678, 1600, 1443, 1358, 1319, 1163, 1071 cm<sup>-1</sup>; HRMS (ESI, *m/z*):  $[M+Na]^+$  Calcd. for C<sub>36</sub>H<sub>30</sub>N<sub>4</sub>O<sub>4</sub>S<sub>2</sub>+Na, 669.1601; found, 669.1601.

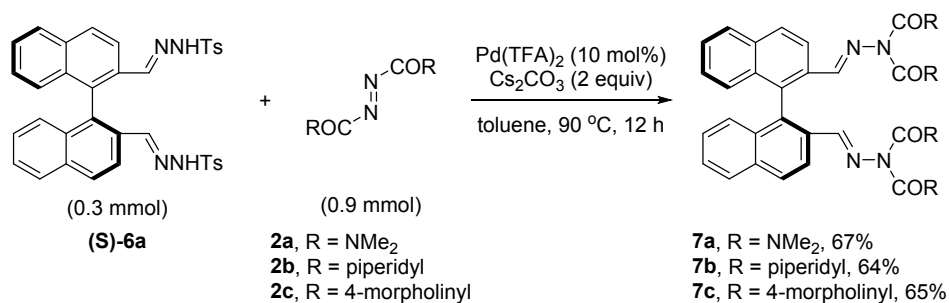

A 25 mL Schlenk tube placed with a magnetic stirring bar, *N*-tosylhydrazone (*S*)-**6a** (0.3 mmol), Pd(TFA)<sub>2</sub> (10 mmol %), Cs<sub>2</sub>CO<sub>3</sub> (0.6 mmol), toluene (6 mL), and azo compound **2** (0.9 mmol) was vigorously stirred at 90 °C for 12 h under N<sub>2</sub> in an oil bath. Then the resulting solution was cooled to room temperature, added water (10 mL), extracted with EtOAc (3 × 10 mL). The combined organic phases were dried over anhydrous Na<sub>2</sub>SO<sub>4</sub>, filtered and concentrated *in vacuo*. Further purification by flash column chromatography on silica gel (eluting with petroleum ether/ethyl acetate) provided the pure product **7**.

### 2,2'-(((*S*)-[1,1'-Binaphthalene]-2,2'-diyl)bis(methanylylidene))bis(*N,N,N',N'*-Tetramethylhydrazine-1,1-Dicarboxamide) (**7a**)

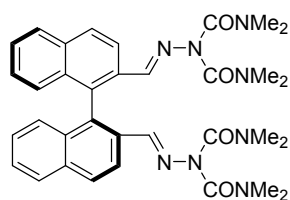

125.0 mg, 67% yield; yellow solid, mp: 141–142 °C;  $[\alpha]_D^{20} = -7.3$  (*c* 0.963, CH<sub>2</sub>Cl<sub>2</sub>); TLC (ethyl acetate):  $R_f = 0.30$ ; <sup>1</sup>H NMR (400 MHz, CDCl<sub>3</sub>) δ 8.21 (d, *J* = 8.8 Hz, 2H), 7.99 (d, *J* = 8.8 Hz, 2H), 7.94 (d, *J* = 8.4 Hz, 2H), 7.51 (t, *J* = 7.6 Hz, 2H), 7.27–7.31 (m, 2H), 7.13 (d, *J* = 8.4 Hz, 2H), 6.94 (s, 2H), 2.72 (s, 24H); <sup>13</sup>C NMR (100 MHz, CDCl<sub>3</sub>) δ 155.1, 140.2, 134.9, 133.9, 133.2, 131.7, 128.9, 128.3, 127.3, 126.6, 122.1, 37.4; IR (KBr): 2931, 2861, 1693, 1483, 1452, 1374, 1262, 1155, 1057 cm<sup>-1</sup>; HRMS (ESI, *m/z*): [M+Na]<sup>+</sup> Calcd. for C<sub>34</sub>H<sub>38</sub>N<sub>8</sub>O<sub>4</sub>+Na, 645.2908; found, 645.2913.

***N',N'''-(((S)-[1,1'-Binaphthalene]-2,2'-diyl)bis(methanylylidene))bis(N-(Piperidine-1-Carbonyl)piperidine-1-Carbohydrazide) (7b)***

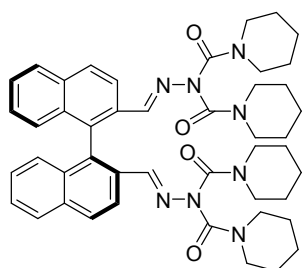

150.0 mg, 64% yield; yellow solid, mp: 127–128 °C;  $[\alpha]_D^{20} = 34.4$  (*c* 0.929, CH<sub>2</sub>Cl<sub>2</sub>); TLC (ethyl acetate):  $R_f = 0.30$ ; <sup>1</sup>H NMR (400 MHz, CDCl<sub>3</sub>) δ 8.22 (d, *J* = 8.8 Hz, 2H), 7.98 (d, *J* = 8.8 Hz, 2H), 7.93 (d, *J* = 8.0 Hz, 2H), 7.49 (t, *J* = 7.2 Hz, 2H), 7.25–7.29 (m, 2H), 7.10 (d, *J* = 8.4 Hz, 2H), 6.98 (s, 2H), 3.15–3.19 (m, 16H), 1.40–1.48 (m, 24H); <sup>13</sup>C NMR (100 MHz, CDCl<sub>3</sub>) δ 154.0, 139.3, 134.8, 133.6, 133.2, 131.9, 128.9, 128.2, 127.3, 127.2, 126.7, 122.0, 46.4, 25.7, 24.3; IR (KBr): 2937, 2858, 1691, 1420, 1273, 1149, 1023 cm<sup>-1</sup>; HRMS (ESI, *m/z*): [M+H]<sup>+</sup> Calcd. for C<sub>46</sub>H<sub>54</sub>N<sub>8</sub>O<sub>4</sub>+H, 783.4341; found, 783.4337.

***N',N'''-(((S)-[1,1'-Binaphthalene]-2,2'-diyl)bis(methanylylidene))bis(N-(Morpholine-4-Carbonyl)morpholine-4-Carbohydrazide) (7c)***

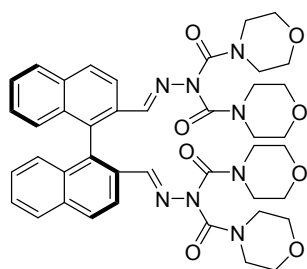

154.1 mg, 65% yield; yellow solid, mp: 147–148 °C;  $[\alpha]_D^{20} = 41.7$  ( $c$  0.885,  $\text{CH}_2\text{Cl}_2$ ); TLC (ethyl acetate):  $R_f = 0.30$ ;  $^1\text{H NMR}$  (400 MHz,  $\text{CDCl}_3$ )  $\delta$  8.15 (d,  $J = 8.8$  Hz, 2H), 8.02 (d,  $J = 8.8$  Hz, 2H), 7.97 (d,  $J = 8.0$  Hz, 2H), 7.55 (t,  $J = 7.2$  Hz, 2H), 7.32 (t,  $J = 7.6$  Hz, 2H), 7.11 (d,  $J = 8.4$  Hz, 2H), 7.02 (s, 2H), 3.44–3.52 (m, 16H), 3.27–3.36 (m, 16H);  $^{13}\text{C NMR}$  (100 MHz,  $\text{CDCl}_3$ )  $\delta$  153.8, 140.8, 135.1, 134.0, 133.1, 131.3, 129.2, 128.4, 127.7, 127.6, 126.6, 121.6, 66.4, 45.8; IR (KBr): 2965, 2858, 1694, 1452, 1420, 1269, 1222, 1114, 1006  $\text{cm}^{-1}$ ; HRMS (ESI,  $m/z$ ):  $[\text{M}+\text{Na}]^+$  Calcd. for  $\text{C}_{42}\text{H}_{46}\text{N}_8\text{O}_8+\text{Na}$ , 813.3331; found, 813.3339.

#### Reference:

(1) Shen, H.; Tang, J.; Chang, H.; Yang, C.; Liu, R. *J. Org. Chem.* **2005**, *70*, 10113.

#### F. X-ray Crystallographic Data

The X-ray crystallographic structure for **5g**. ORTEP representation with 50% probability thermal ellipsoids. Solvent and hydrogen are omitted for clarity. Crystal data have been deposited to CCDC, number 1486805.

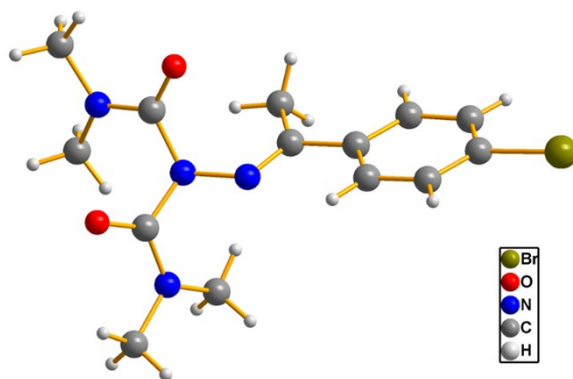

|                             |                                                    |
|-----------------------------|----------------------------------------------------|
| Empirical formula           | $\text{C}_{14}\text{H}_{19}\text{BrN}_4\text{O}_2$ |
| Formula weight              | 355.24                                             |
| Temperature                 | 293(2) K                                           |
| Wavelength                  | 0.71073 Å                                          |
| Crystal system, space group | ORTHORHOMBIC, $P2(1)2(1)2(1)$                      |

|                                   |                                                        |                                                      |
|-----------------------------------|--------------------------------------------------------|------------------------------------------------------|
| Unit cell dimensions              | a = 5.1666(10) Å<br>b = 12.446(3) Å<br>c = 25.390(5) Å | alpha = 90 deg.<br>beta = 90 deg.<br>gamma = 90 deg. |
| Volume                            | 1632.6(6) Å <sup>3</sup>                               |                                                      |
| Z, Calculated density             | 4, 1.445 Mg/m <sup>3</sup>                             |                                                      |
| Absorption coefficient            | 2.528 mm <sup>-1</sup>                                 |                                                      |
| F(000)                            | 728                                                    |                                                      |
| Crystal size                      | 0.10×0.10×0.10 mm                                      |                                                      |
| Theta range for data collection   | 3.21 to 27.46 deg.                                     |                                                      |
| Limiting indices                  | -6 ≤ h ≤ 5, -16 ≤ k ≤ 16, -32 ≤ l ≤ 32                 |                                                      |
| Reflections collected / unique    | 14756 / 3690 [R(int) = 0.1165]                         |                                                      |
| Completeness to theta = 27.46     | 99.5%                                                  |                                                      |
| Refinement method                 | Full-matrix least-squares on F <sup>2</sup>            |                                                      |
| Data / restraints / parameters    | 3690 / 0 / 191                                         |                                                      |
| Goodness-of-fit on F <sup>2</sup> | 0.914                                                  |                                                      |
| Final R indices [I > 2σ(I)]       | R1 = 0.0440, wR2 = 0.0585                              |                                                      |
| R indices (all data)              | R1 = 0.1714, wR2 = 0.0743                              |                                                      |
| Extinction coefficient            | 0.000(4)                                               |                                                      |
| Largest diff. peak and hole       | 0.218 and -0.211 e. Å <sup>-3</sup>                    |                                                      |

## G. NMR Spectra of New Compounds

### $^1\text{H}$ NMR (400 MHz, $\text{CDCl}_3$ ) spectrum for **3a**

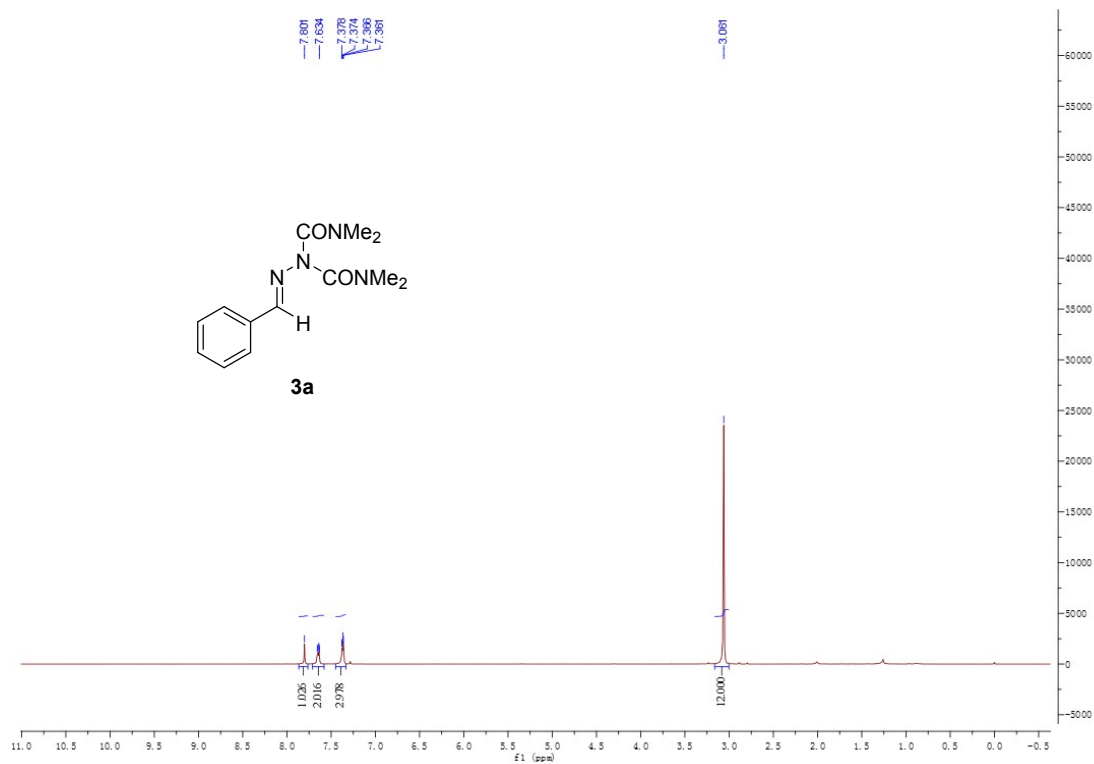

### $^{13}\text{C}$ NMR (100 MHz, $\text{CDCl}_3$ ) spectrum for **3a**

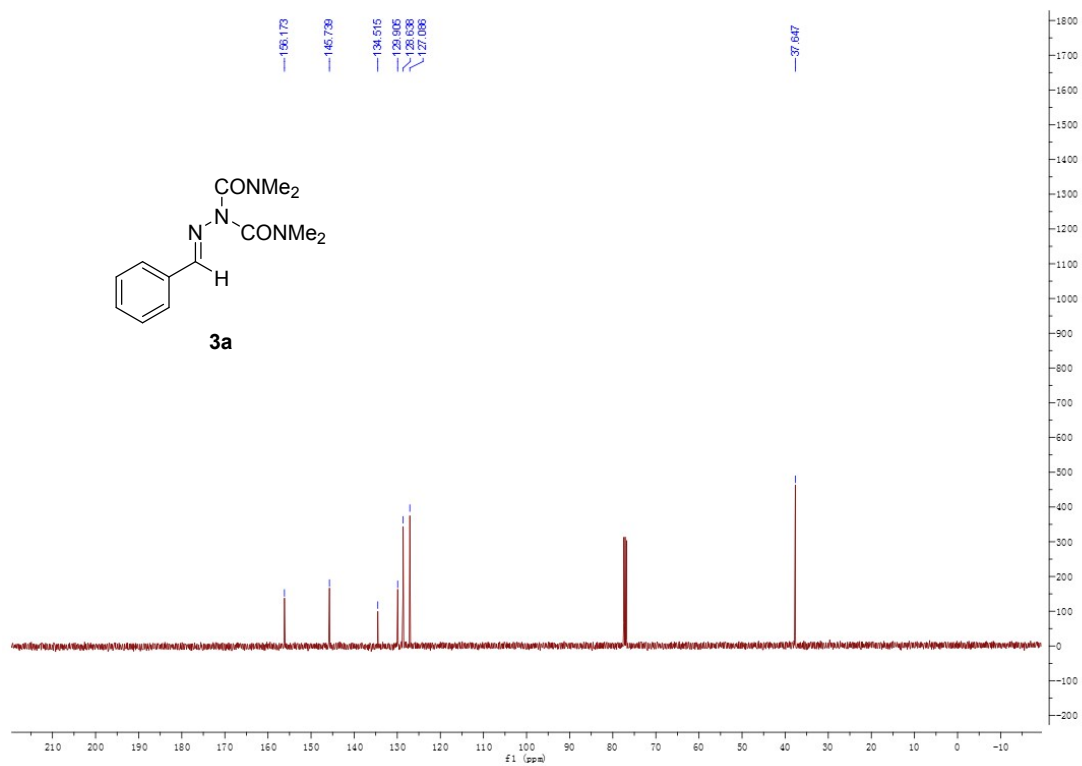



**<sup>1</sup>H NMR (400 MHz, CDCl<sub>3</sub>) spectrum for 3b**

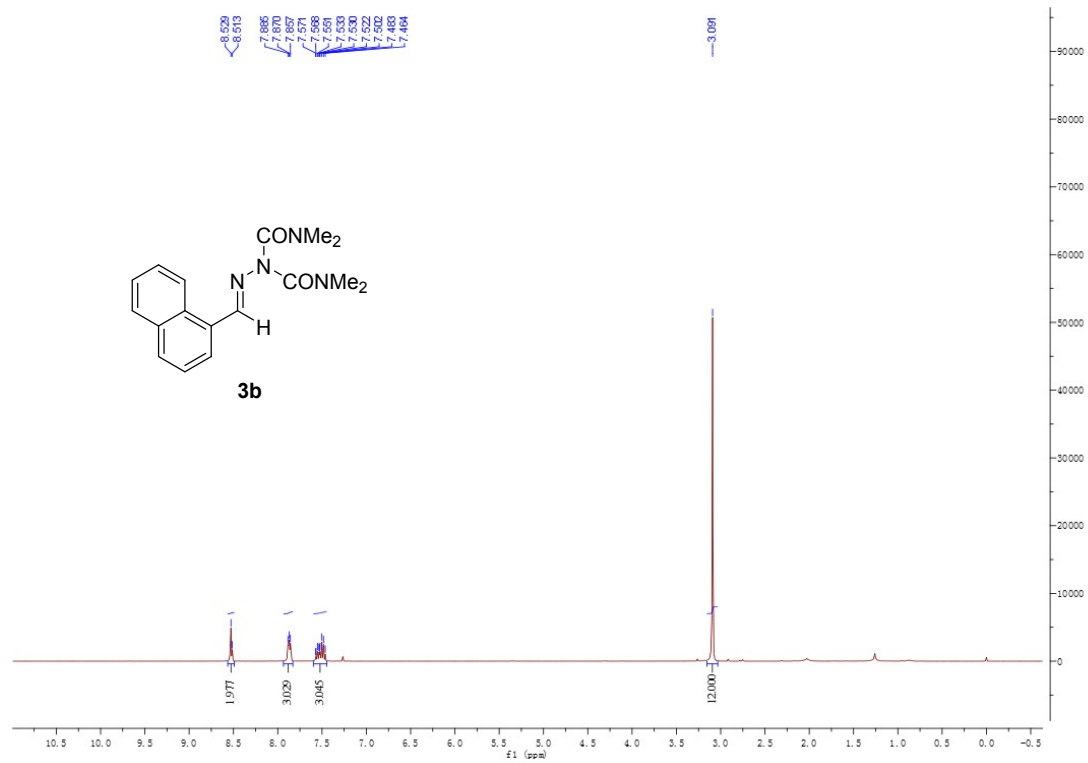

**<sup>13</sup>C NMR (100 MHz, CDCl<sub>3</sub>) spectrum for 3b**

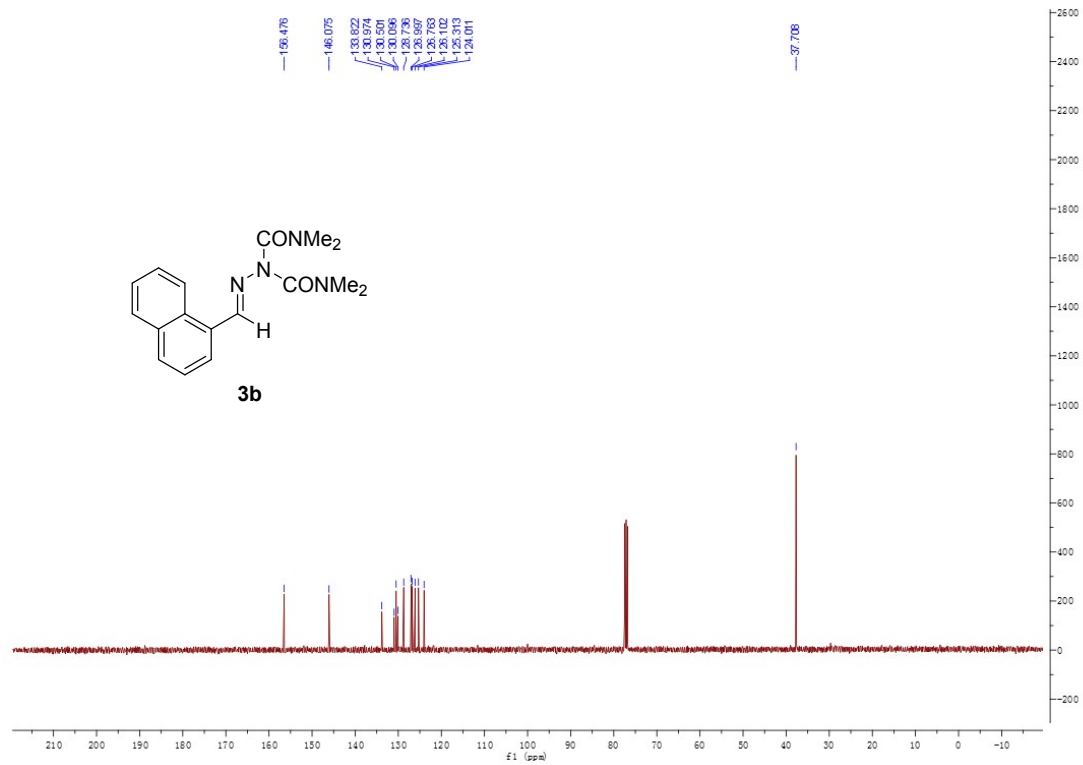

**<sup>1</sup>H NMR (400 MHz, CDCl<sub>3</sub>) spectrum for 3c**

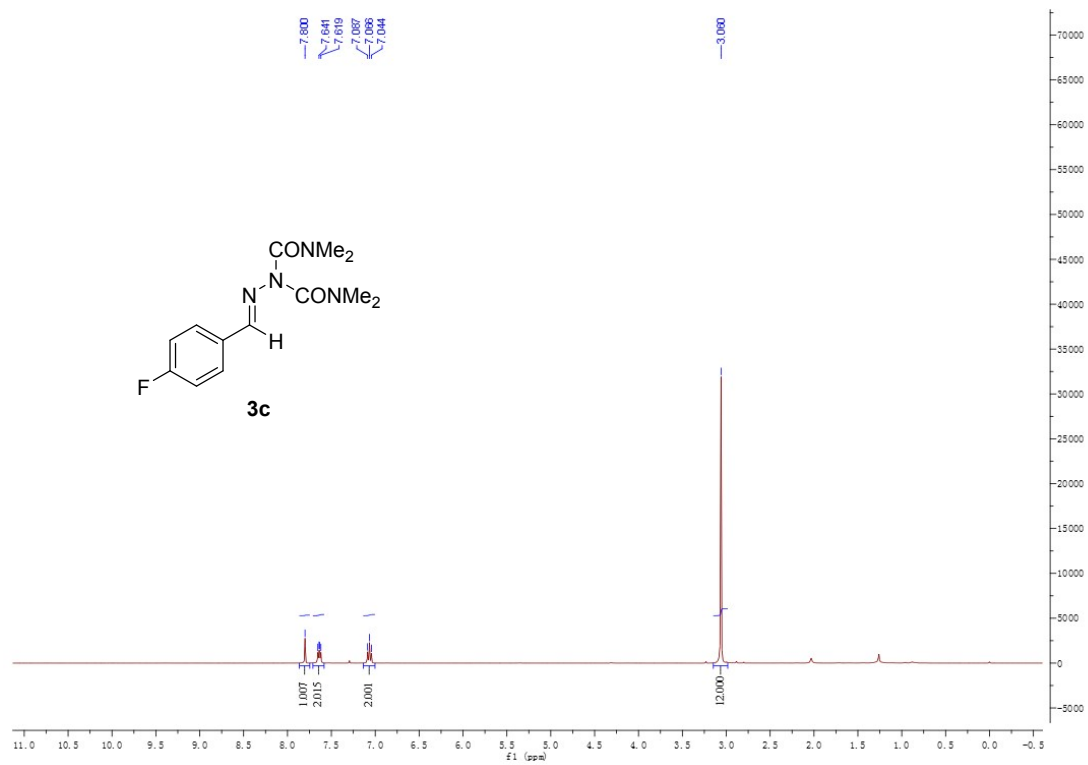

**<sup>13</sup>C NMR (100 MHz, CDCl<sub>3</sub>) spectrum for 3c**

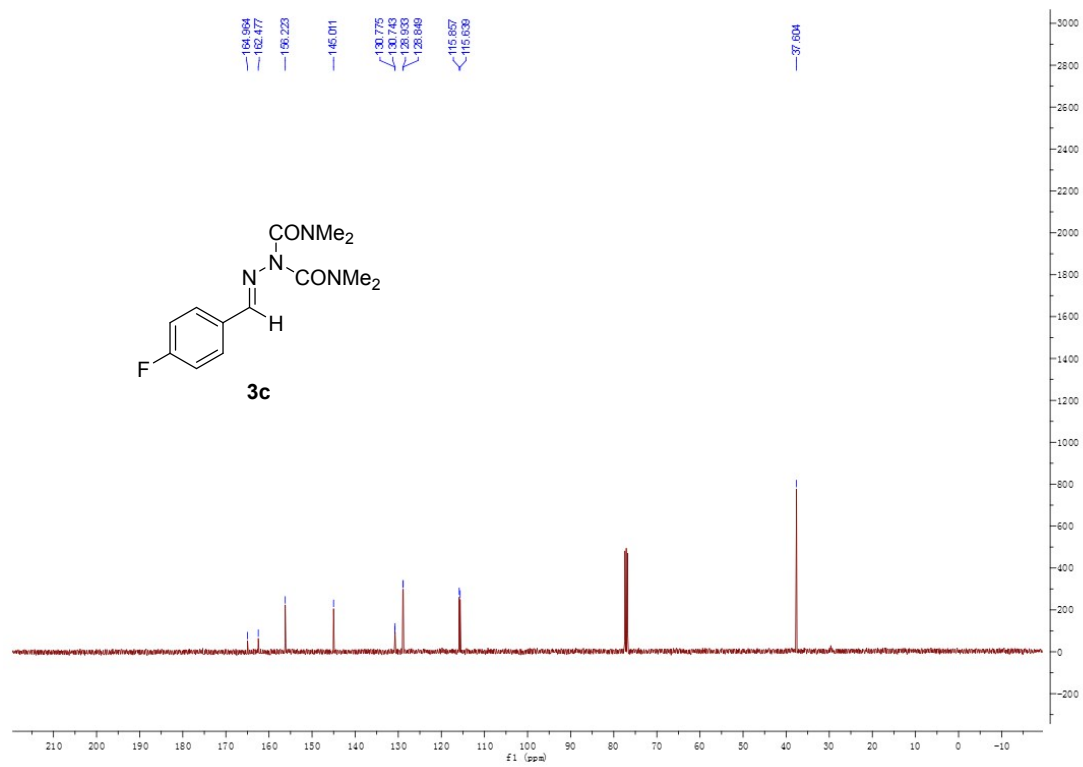

**<sup>1</sup>H NMR (400 MHz, CDCl<sub>3</sub>) spectrum for 3d**

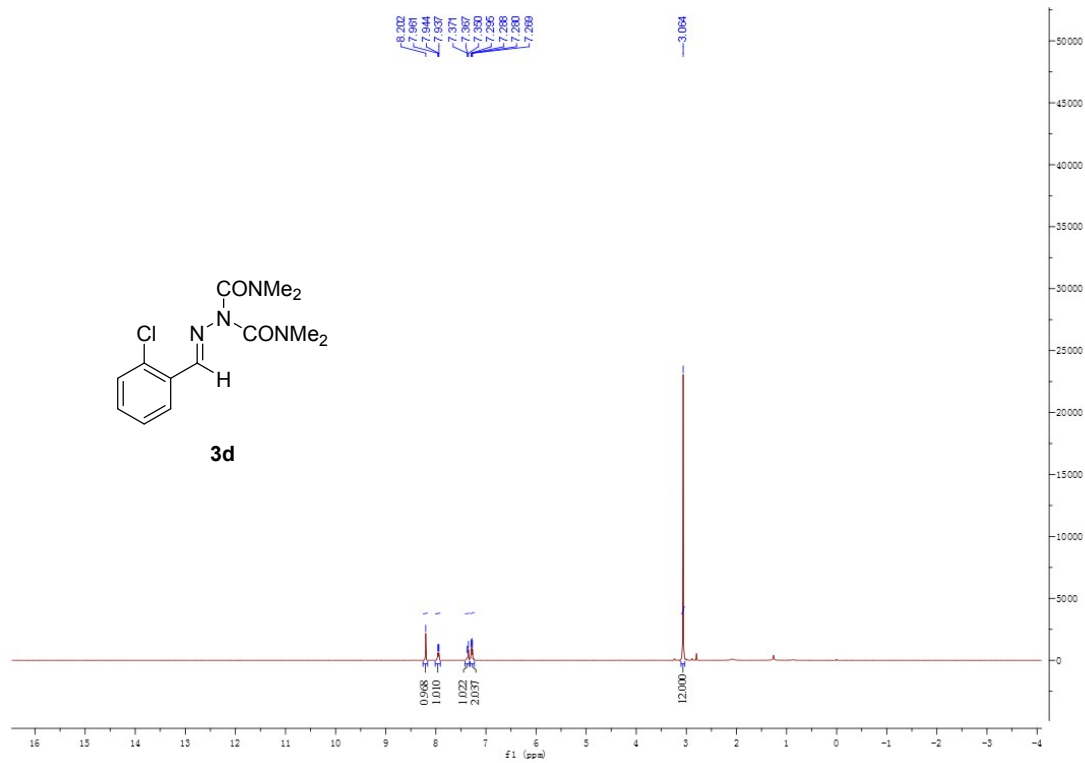

**<sup>13</sup>C NMR (100 MHz, CDCl<sub>3</sub>) spectrum for 3d**

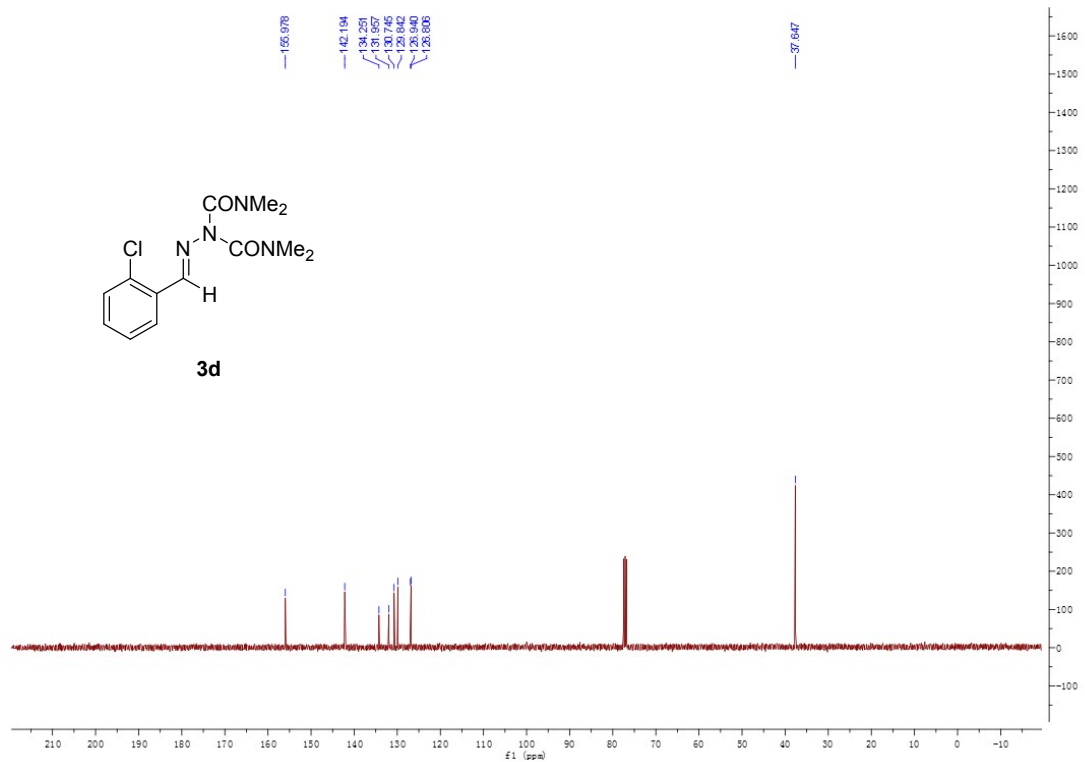

**<sup>1</sup>H NMR (400 MHz, CDCl<sub>3</sub>) spectrum for 3e**

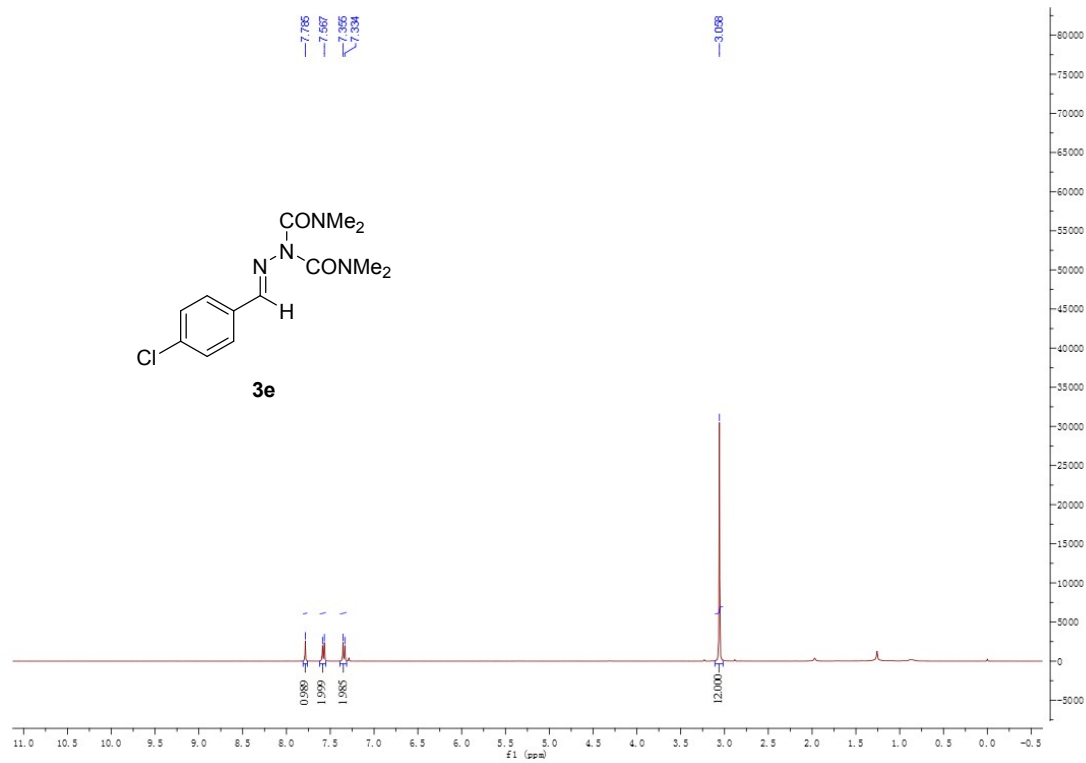

**<sup>13</sup>C NMR (100 MHz, CDCl<sub>3</sub>) spectrum for 3e**

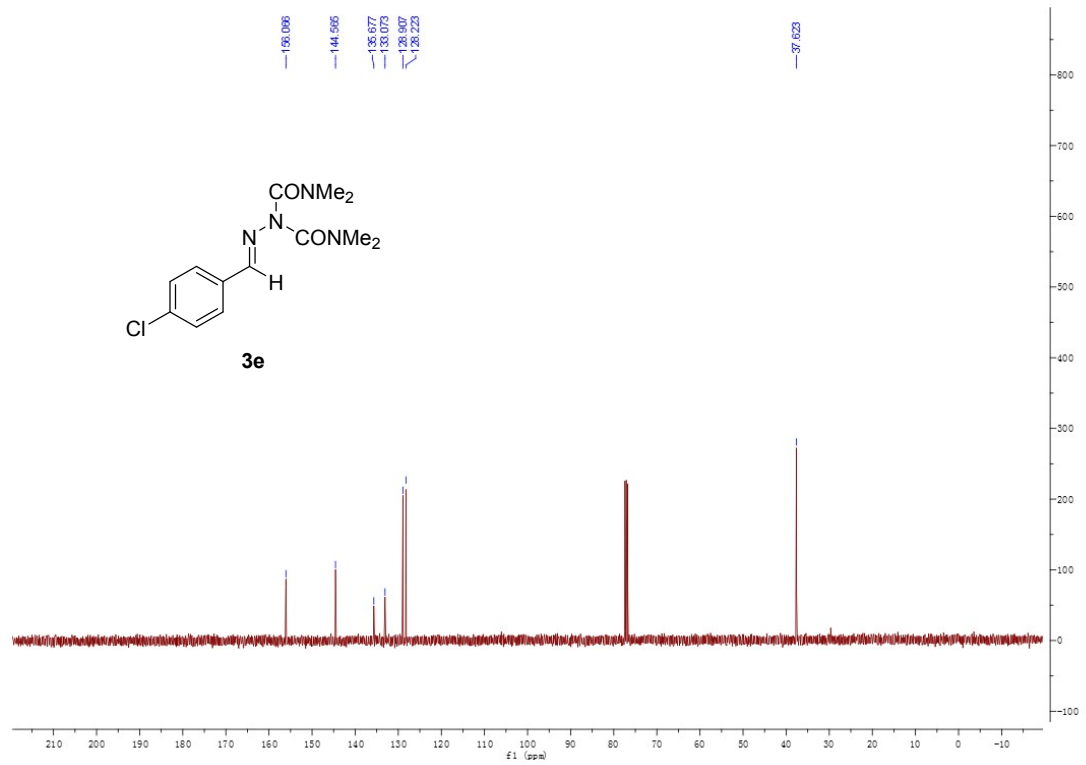

**<sup>1</sup>H NMR (400 MHz, CDCl<sub>3</sub>) spectrum for 3f**

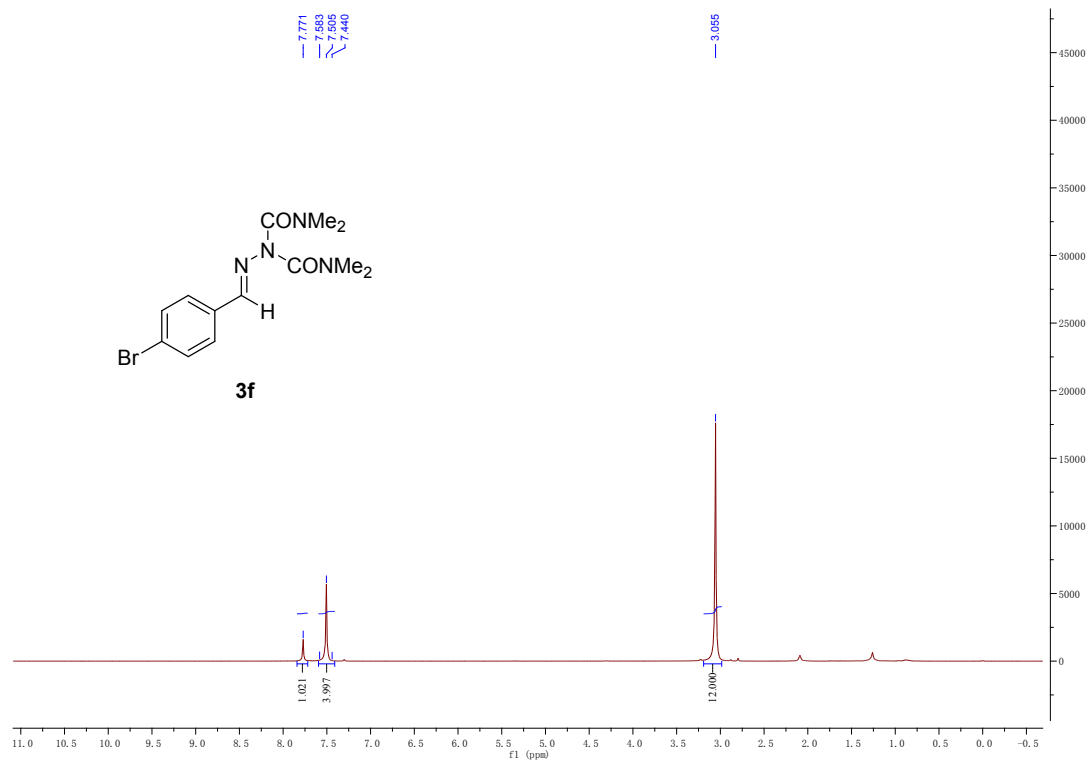

**<sup>13</sup>C NMR (100 MHz, CDCl<sub>3</sub>) spectrum for 3f**

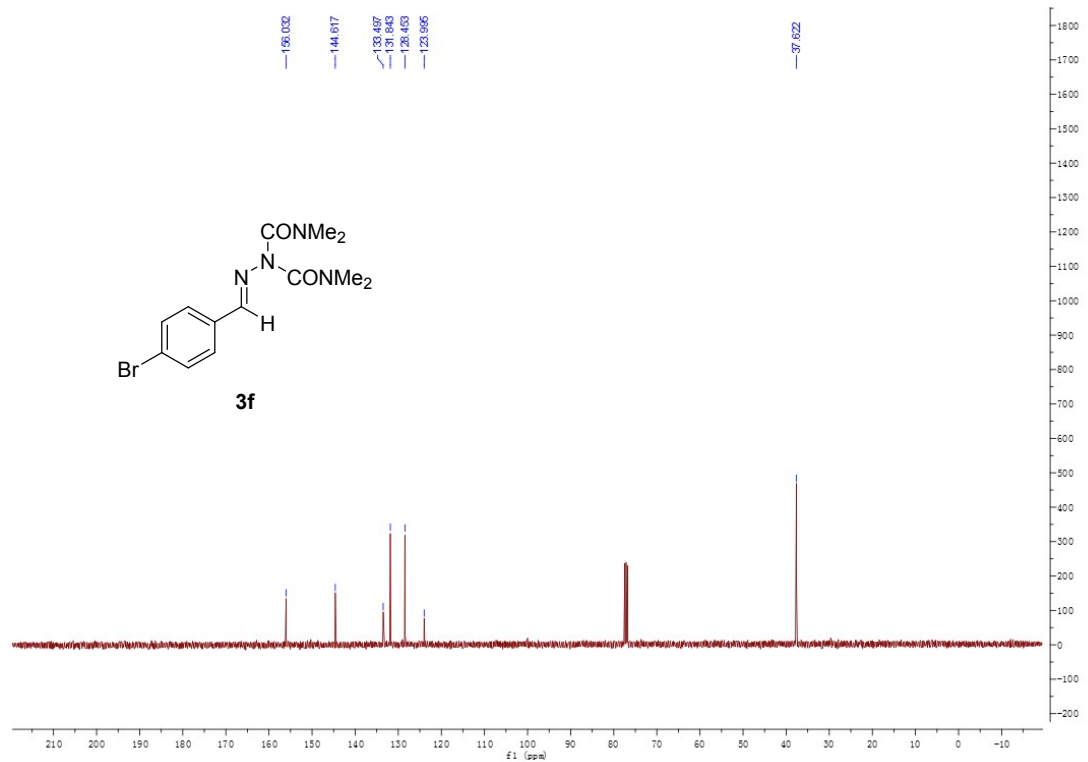

**<sup>1</sup>H NMR (400 MHz, CDCl<sub>3</sub>) spectrum for 3g**

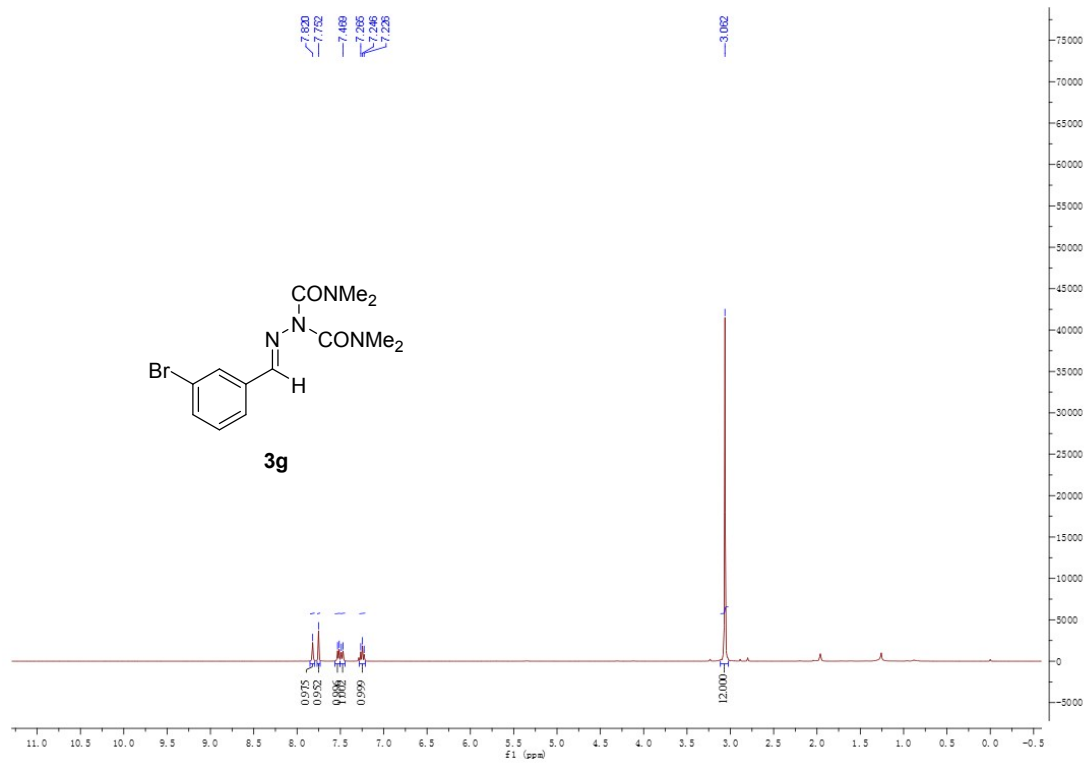

**<sup>13</sup>C NMR (100 MHz, CDCl<sub>3</sub>) spectrum for 3g**

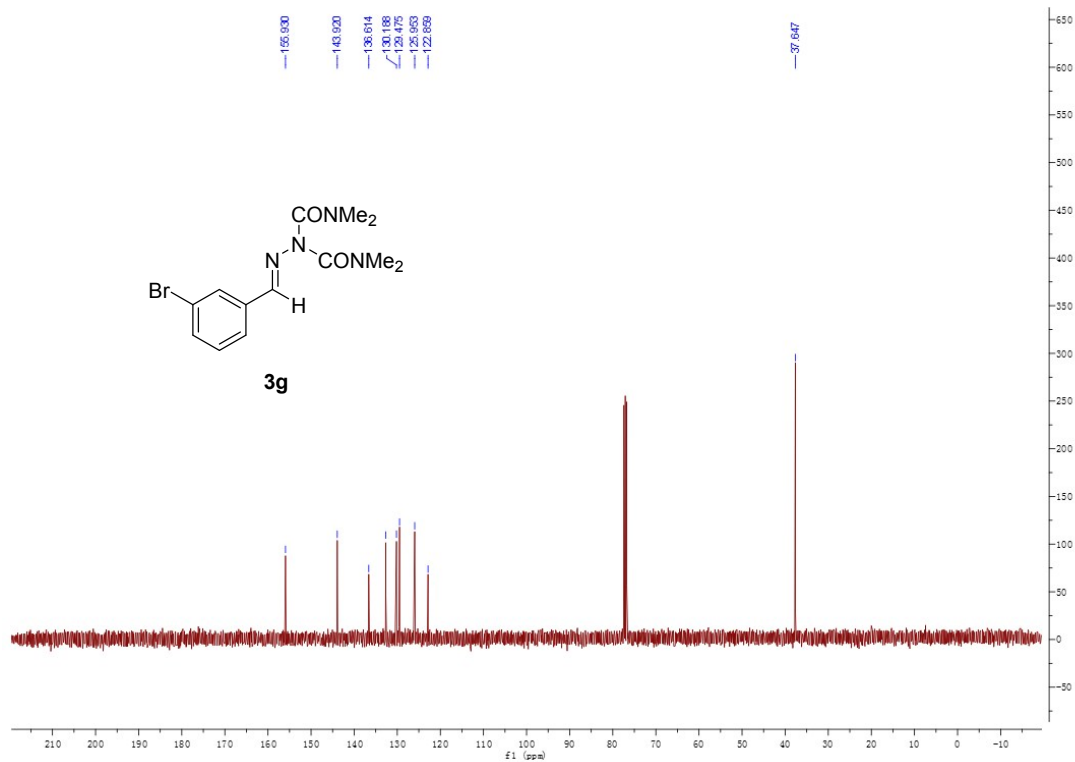

**<sup>1</sup>H NMR (400 MHz, CDCl<sub>3</sub>) spectrum for 3h**

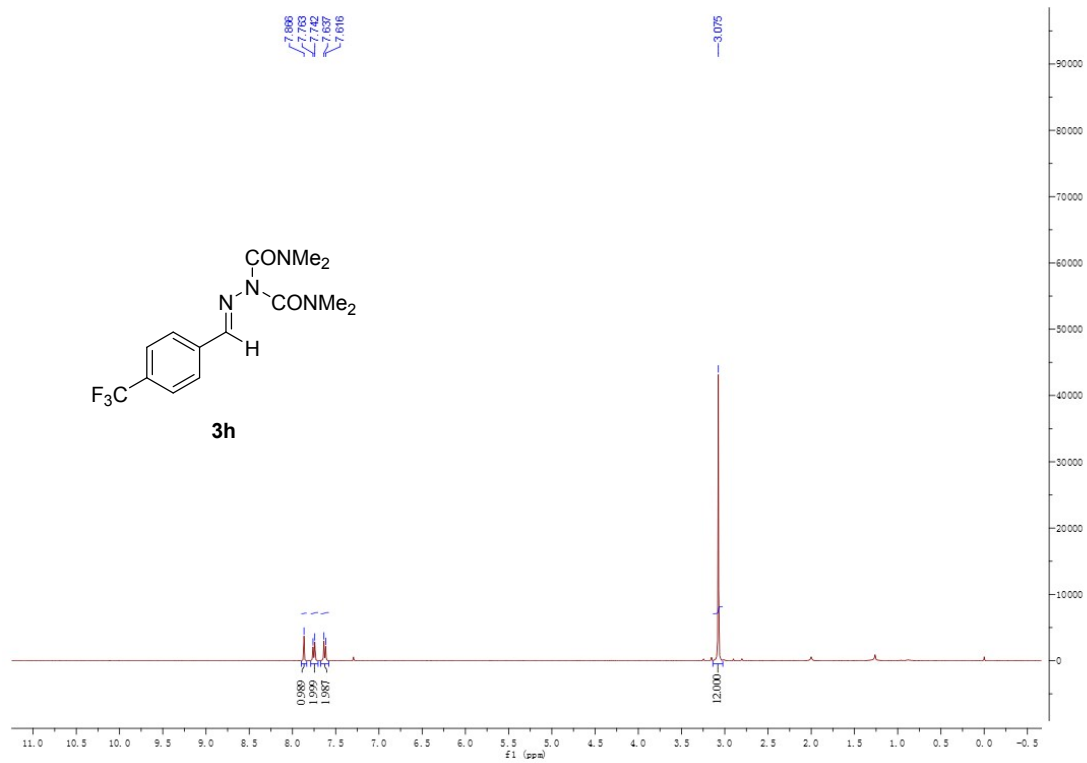

**<sup>13</sup>C NMR (100 MHz, CDCl<sub>3</sub>) spectrum for 3h**

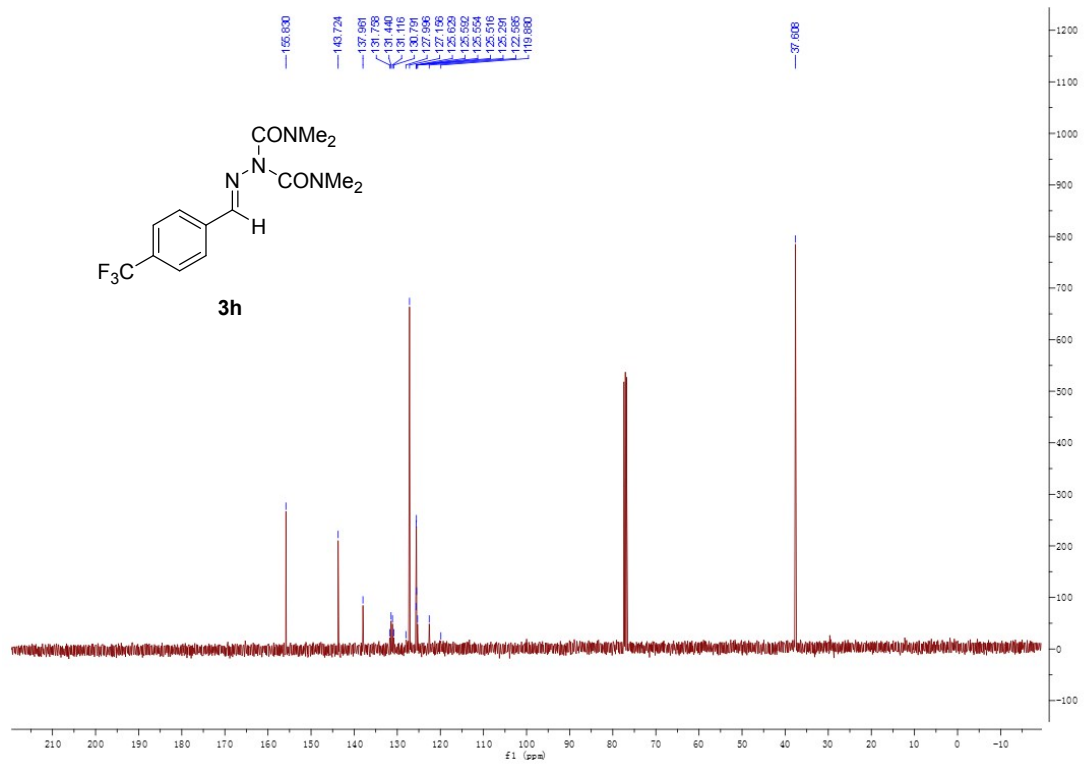

**<sup>1</sup>H NMR (400 MHz, CDCl<sub>3</sub>) spectrum for 3i**

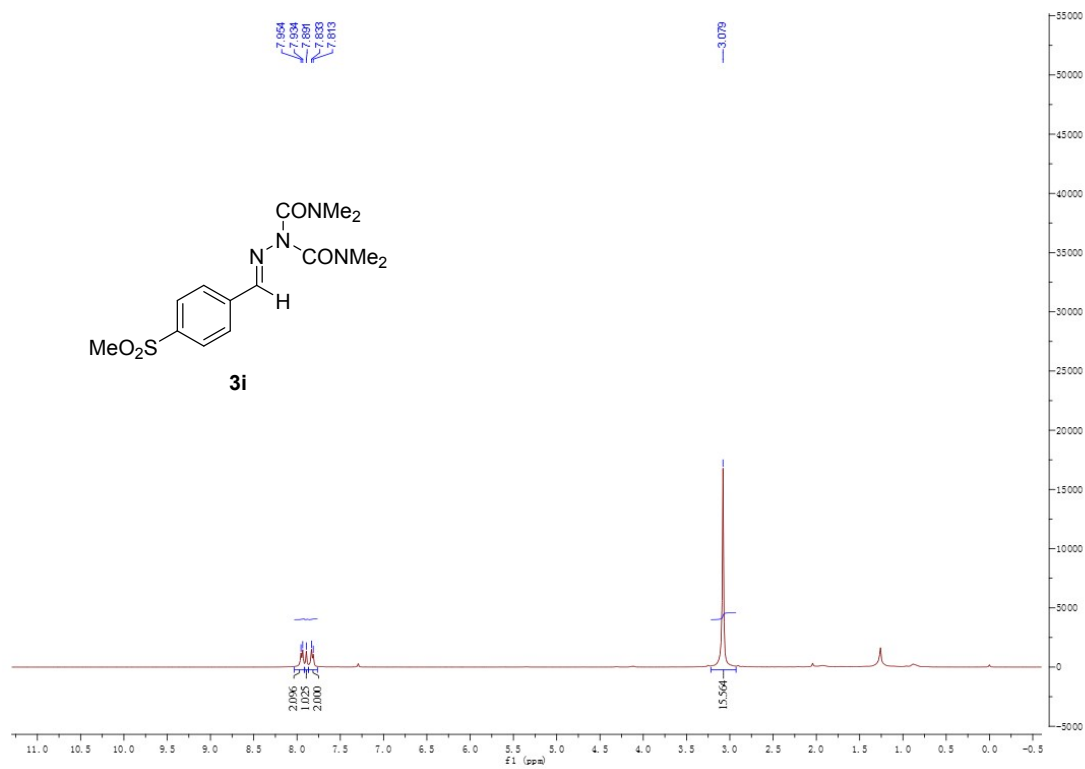

**<sup>13</sup>C NMR (100 MHz, CDCl<sub>3</sub>) spectrum for 3i**

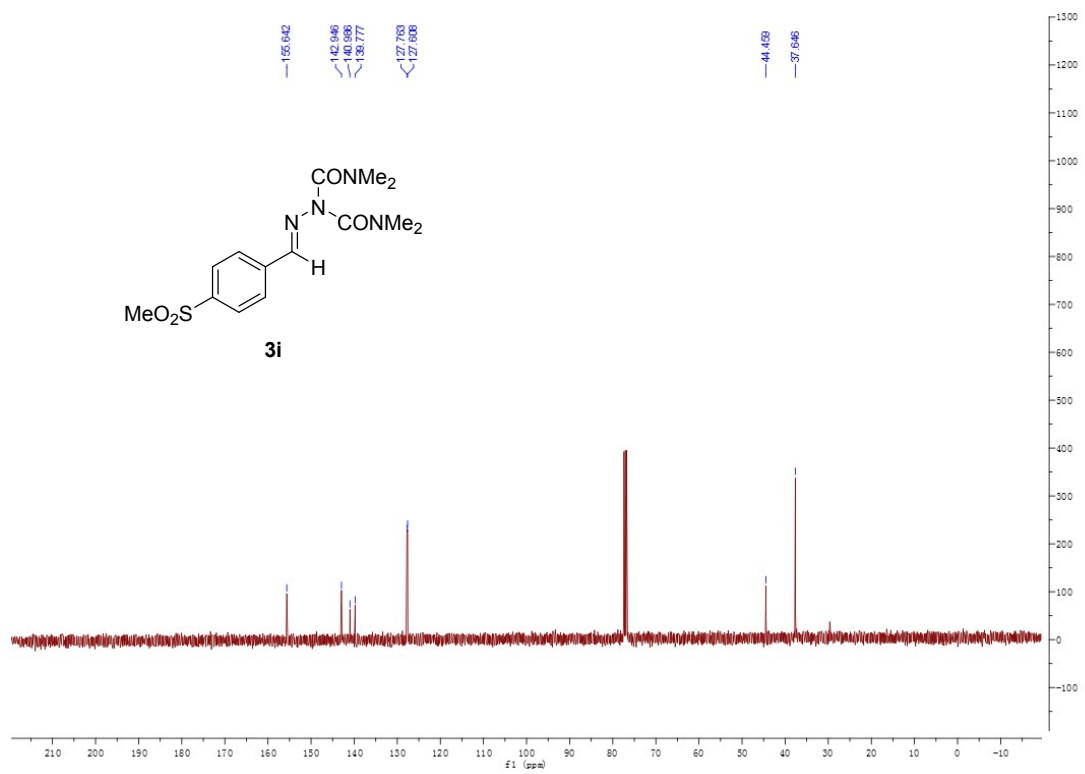



**<sup>1</sup>H NMR (400 MHz, CDCl<sub>3</sub>) spectrum for 3j**

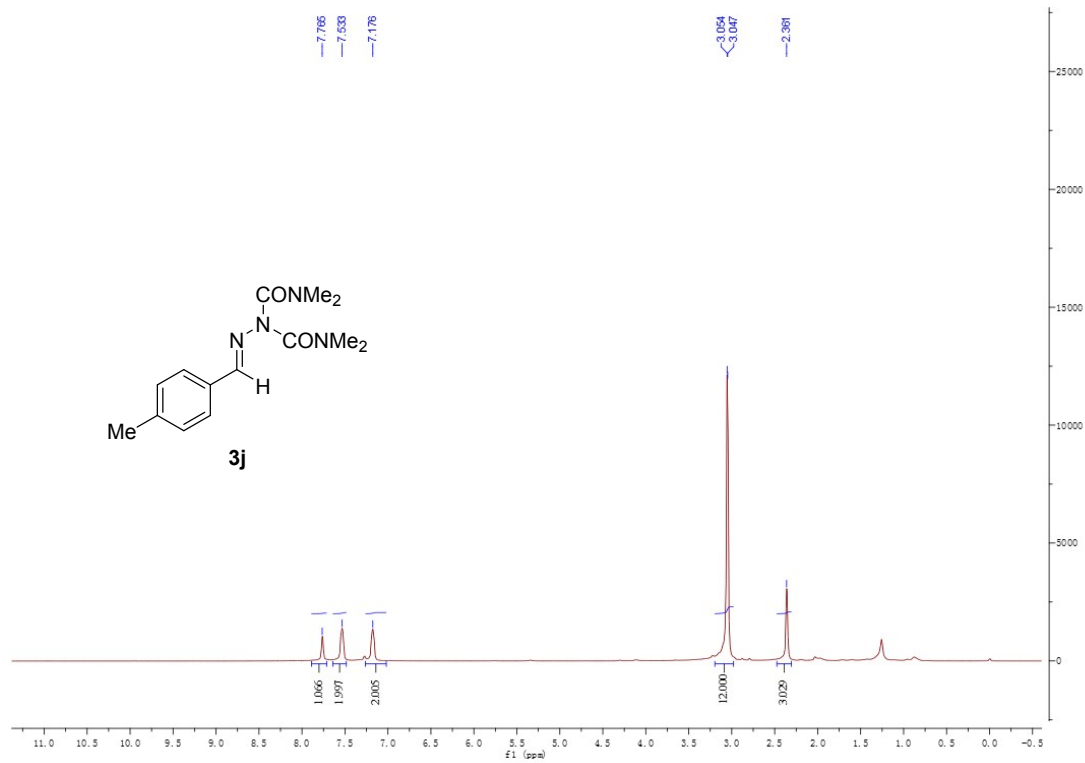

**<sup>13</sup>C NMR (100 MHz, CDCl<sub>3</sub>) spectrum for 3j**

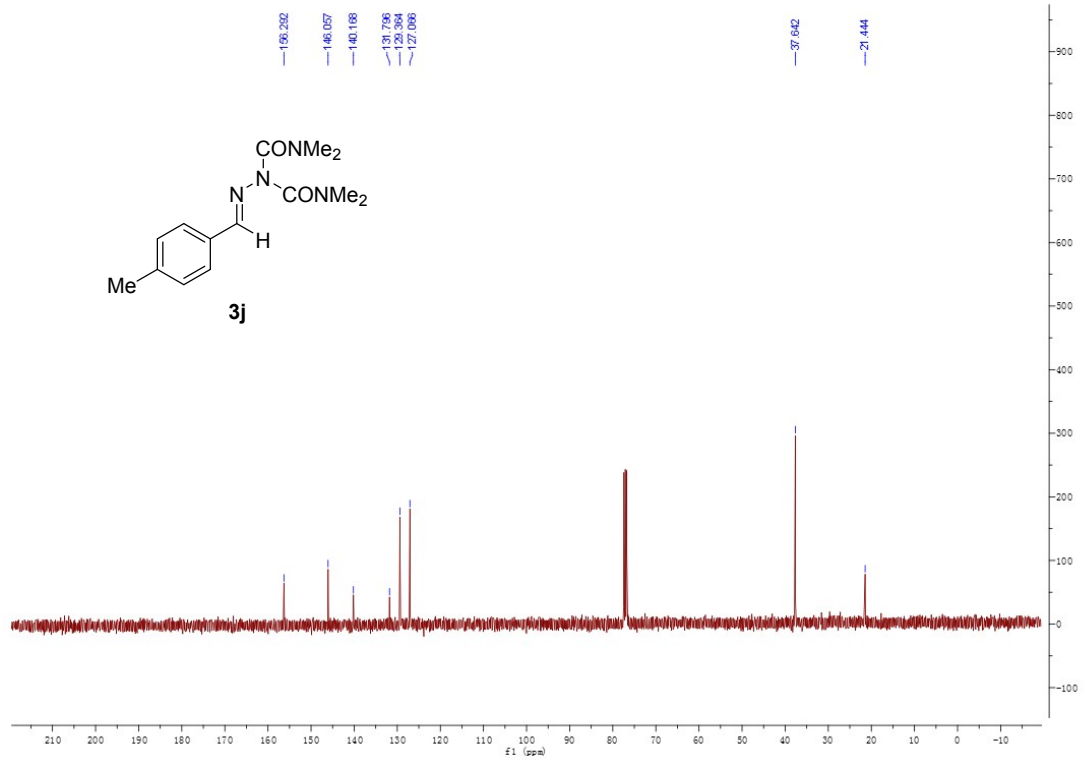

### $^1\text{H}$ NMR (400 MHz, $\text{CDCl}_3$ ) spectrum for 3k

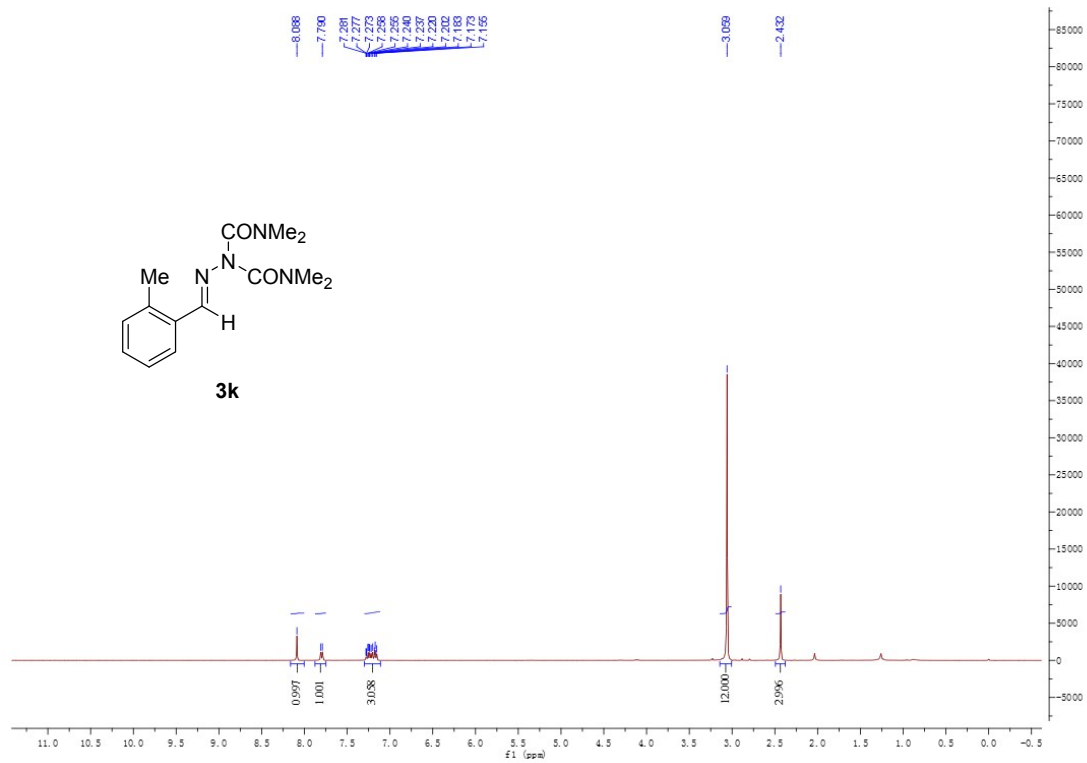

### $^{13}\text{C}$ NMR (100 MHz, $\text{CDCl}_3$ ) spectrum for 3k

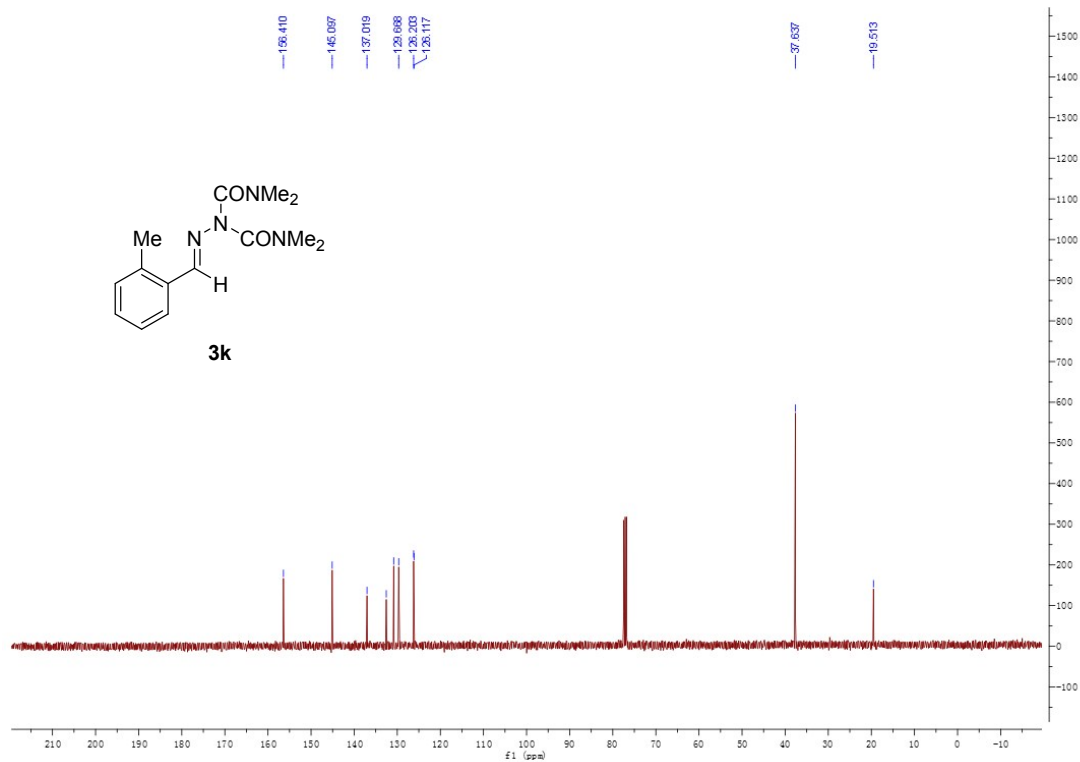

### <sup>1</sup>H NMR (400 MHz, CDCl<sub>3</sub>) spectrum for 31

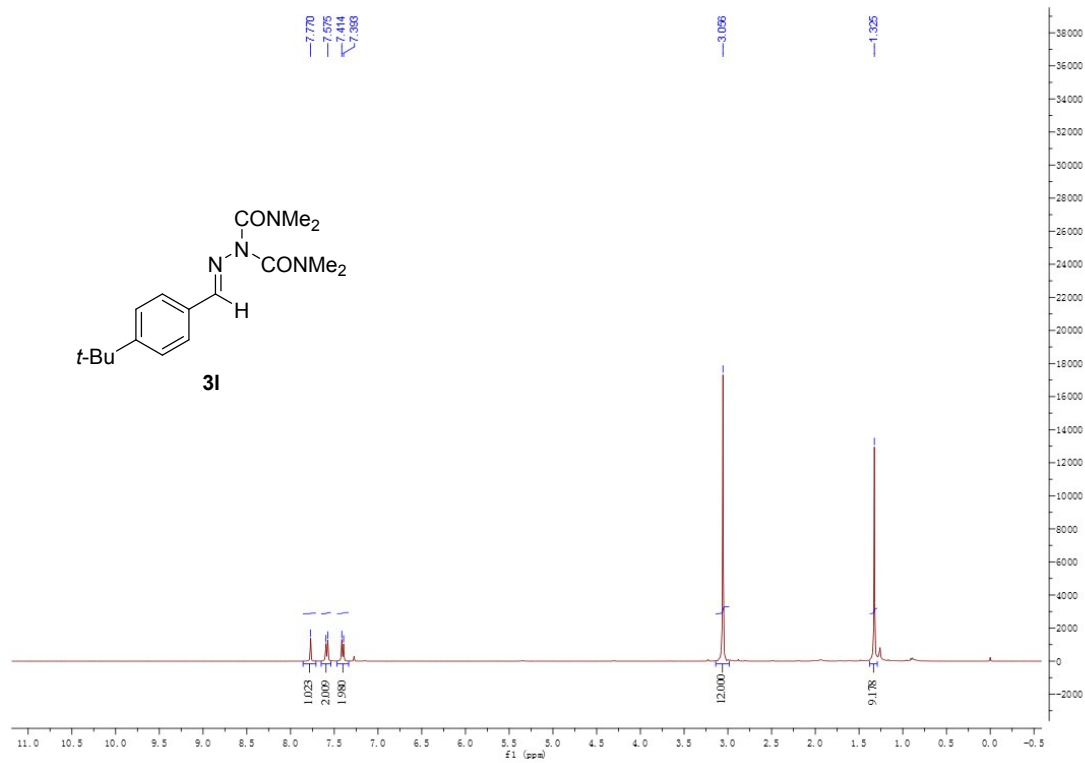

### <sup>13</sup>C NMR (100 MHz, CDCl<sub>3</sub>) spectrum for 31

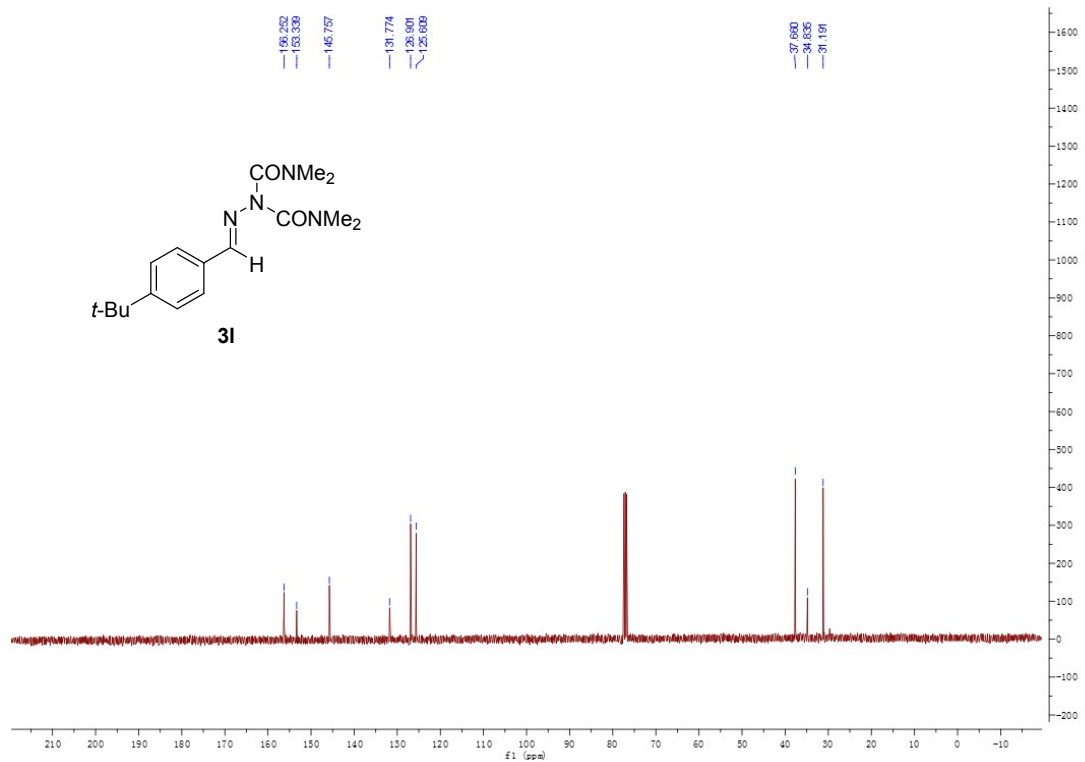

**<sup>1</sup>H NMR (400 MHz, CDCl<sub>3</sub>) spectrum for 3m**

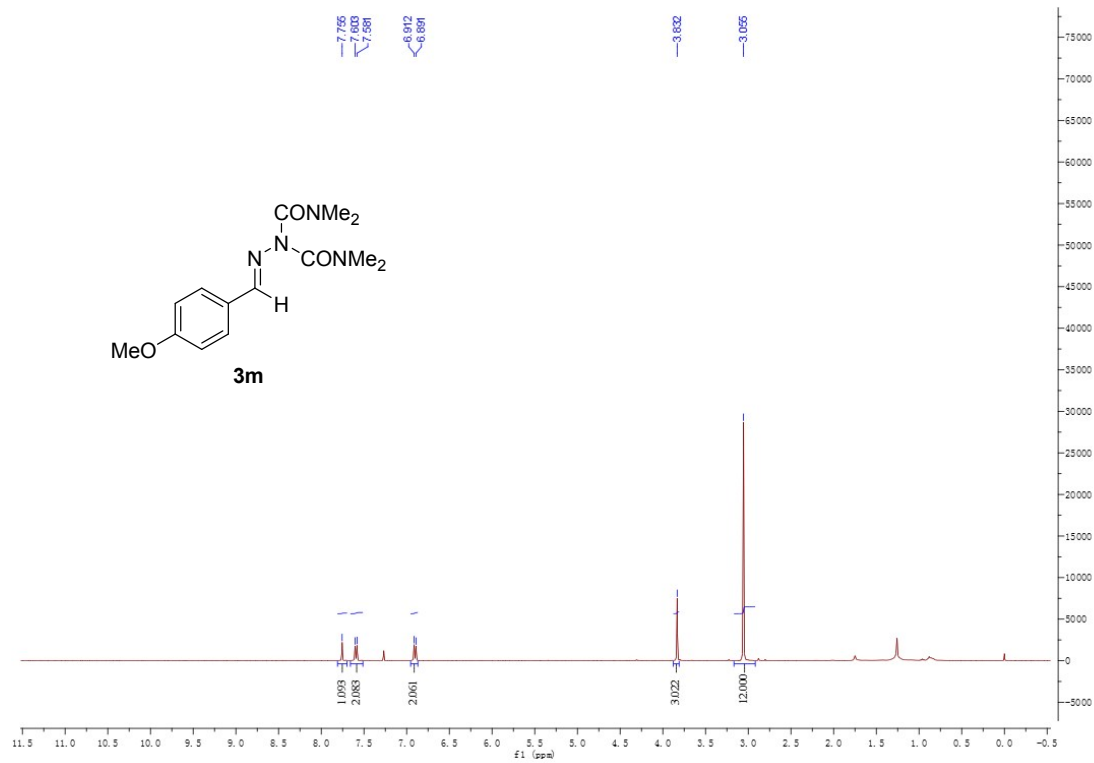

**<sup>13</sup>C NMR (100 MHz, CDCl<sub>3</sub>) spectrum for 3m**

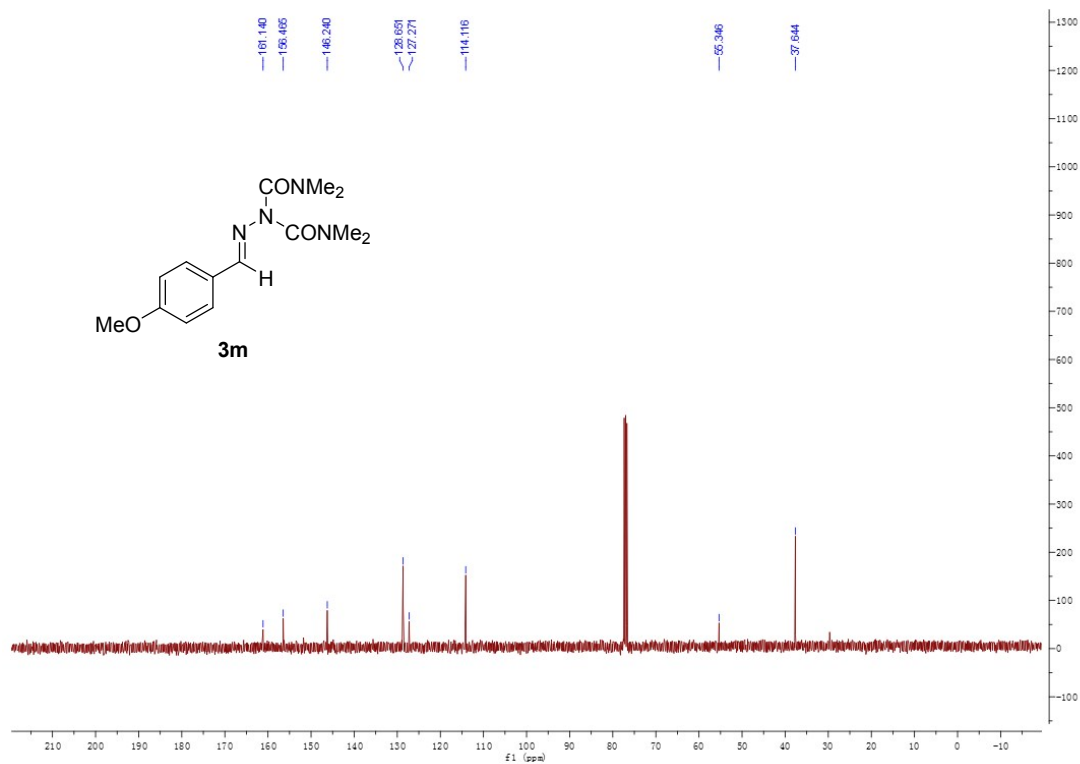

**<sup>1</sup>H NMR (400 MHz, CDCl<sub>3</sub>) spectrum for 3n**

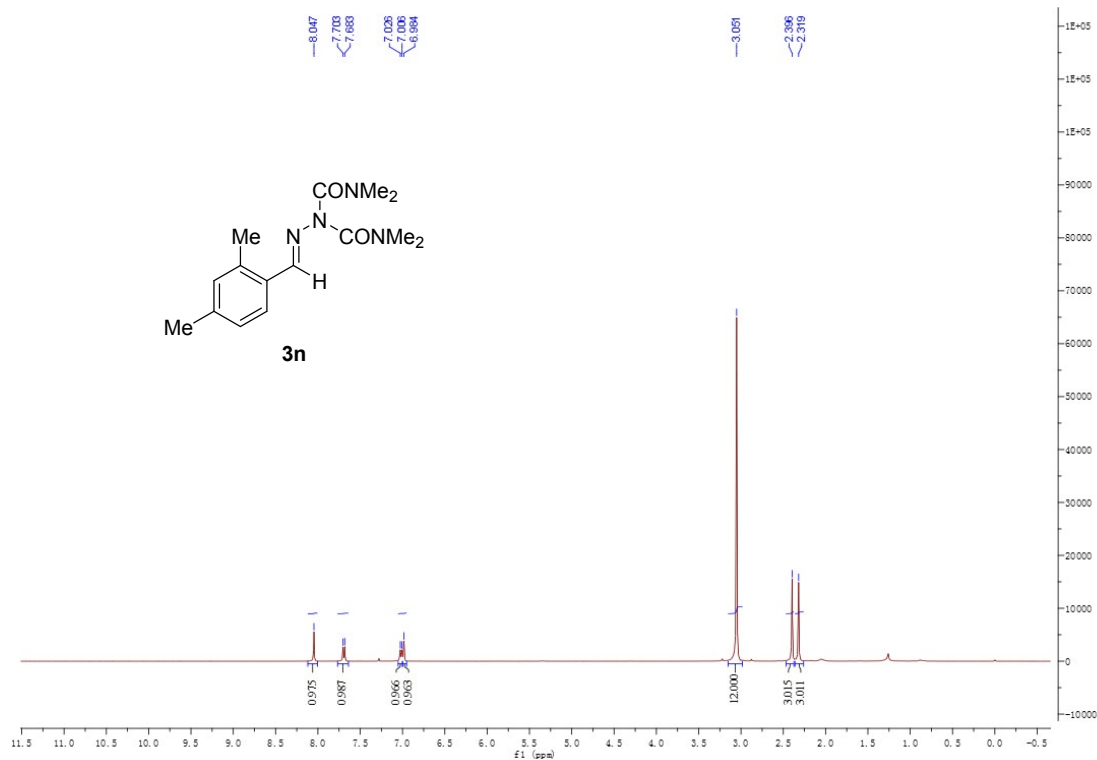

**<sup>13</sup>C NMR (100 MHz, CDCl<sub>3</sub>) spectrum for 3n**

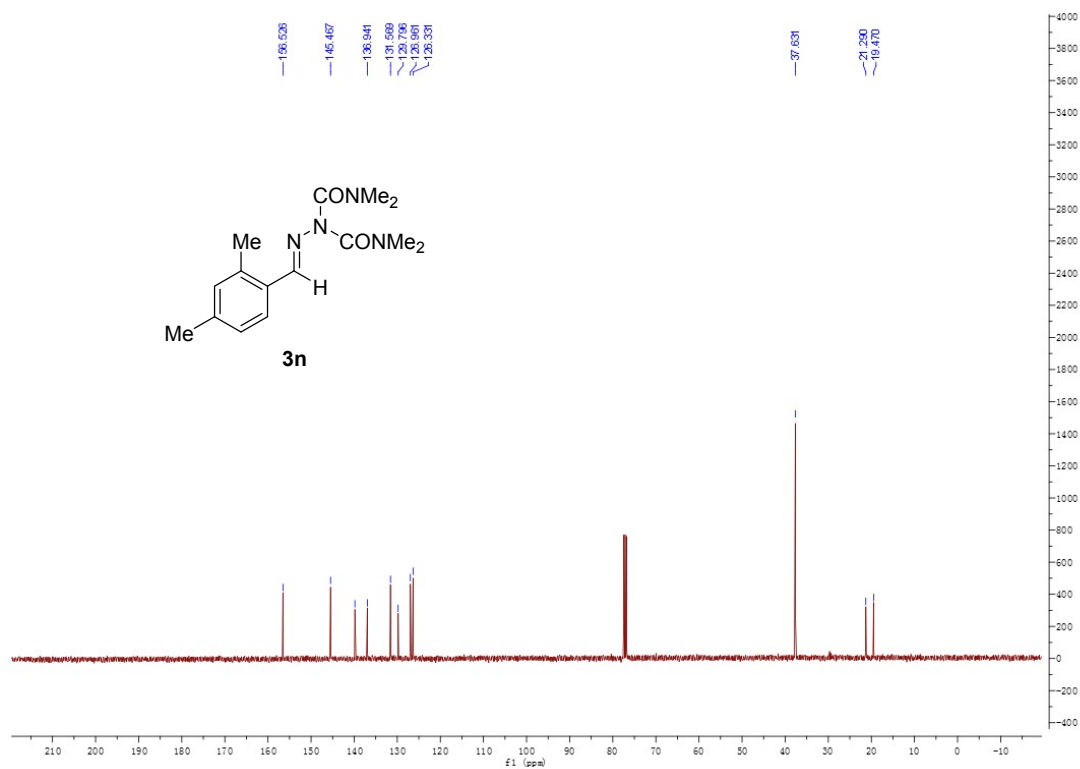

### <sup>1</sup>H NMR (400 MHz, CDCl<sub>3</sub>) spectrum for 3o

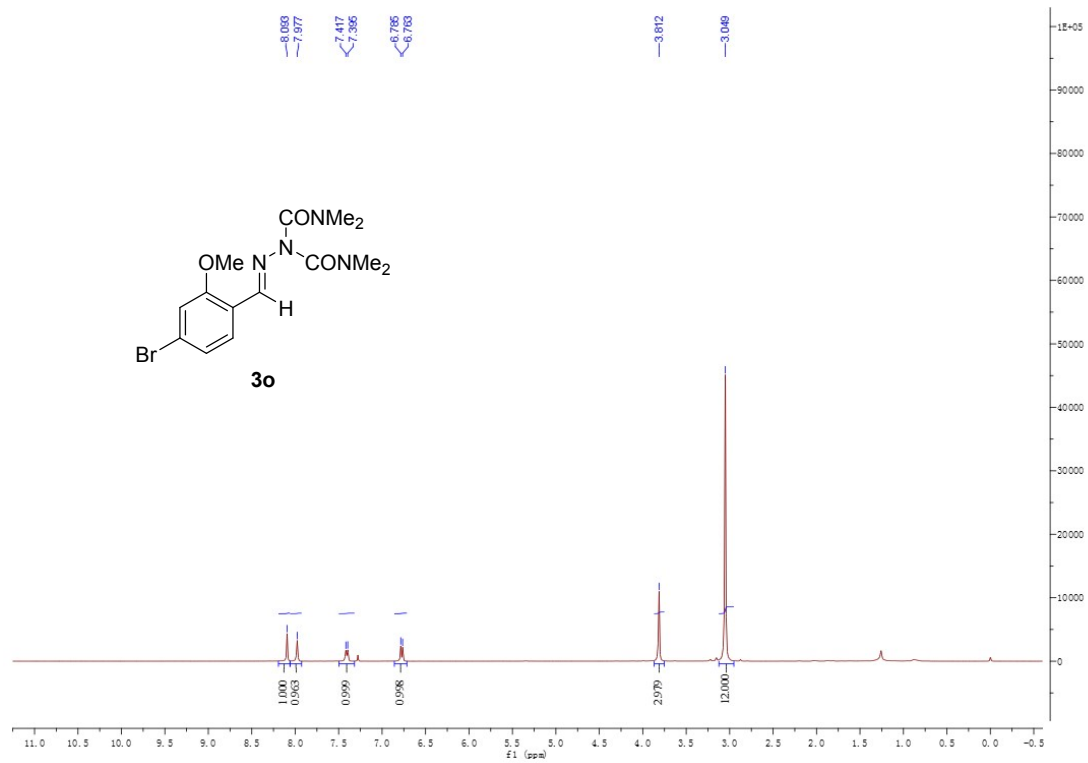

### <sup>13</sup>C NMR (100 MHz, CDCl<sub>3</sub>) spectrum for 3o

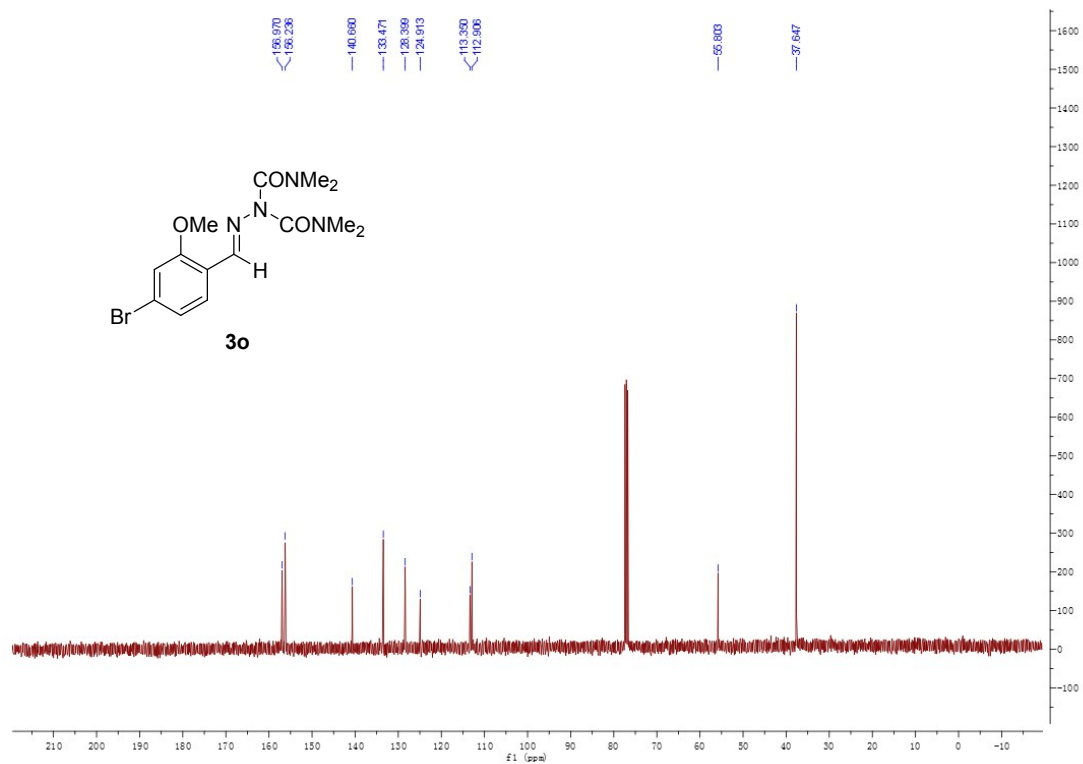

**<sup>1</sup>H NMR (400 MHz, CDCl<sub>3</sub>) spectrum for 3p**

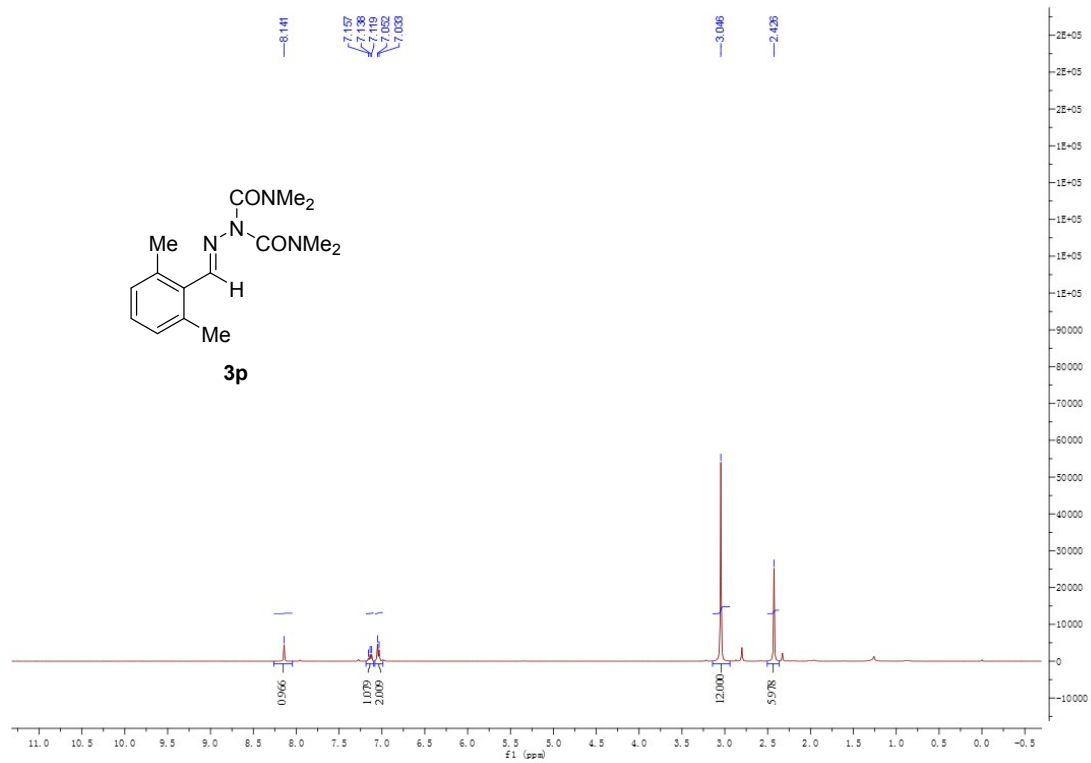

**<sup>13</sup>C NMR (150 MHz, CDCl<sub>3</sub>) spectrum for 3p**

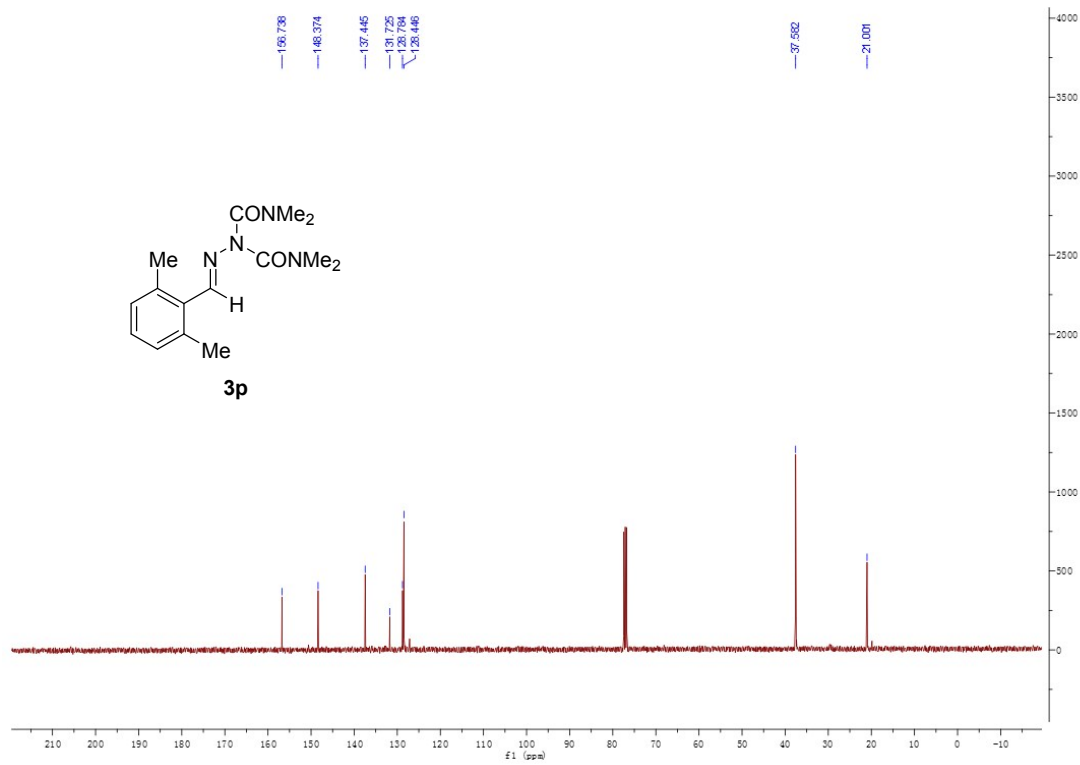

**<sup>1</sup>H NMR (400 MHz, CDCl<sub>3</sub>) spectrum for 3q**

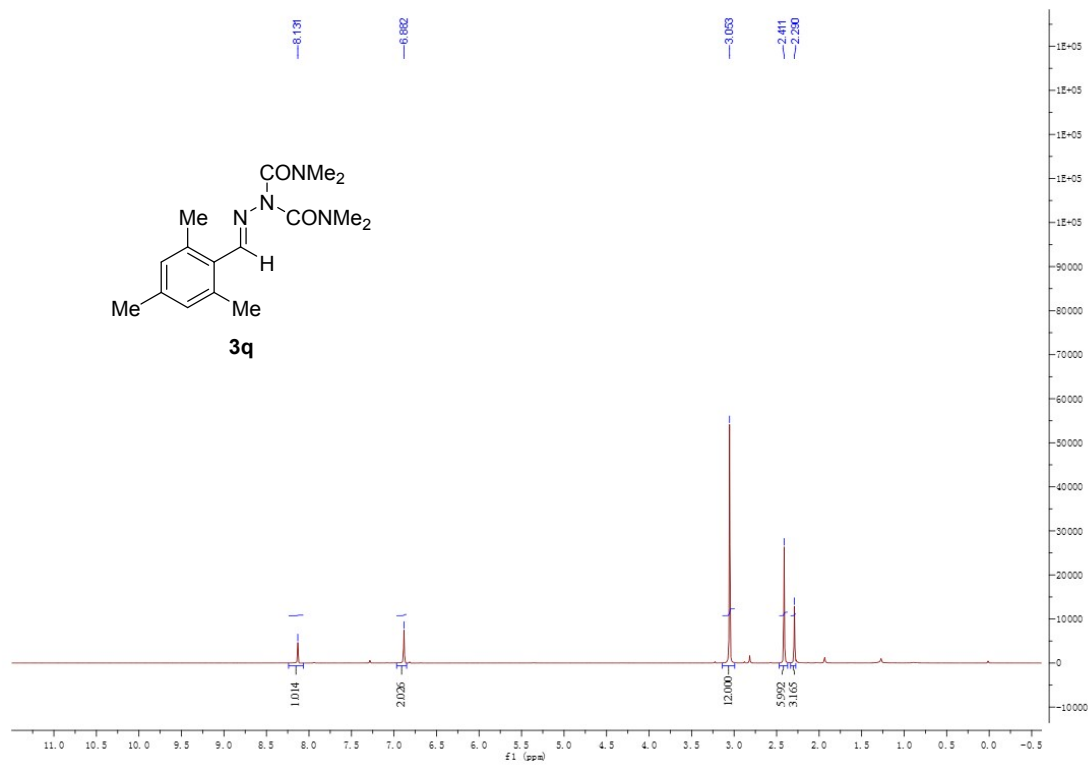

**<sup>13</sup>C NMR (100 MHz, CDCl<sub>3</sub>) spectrum for 3q**

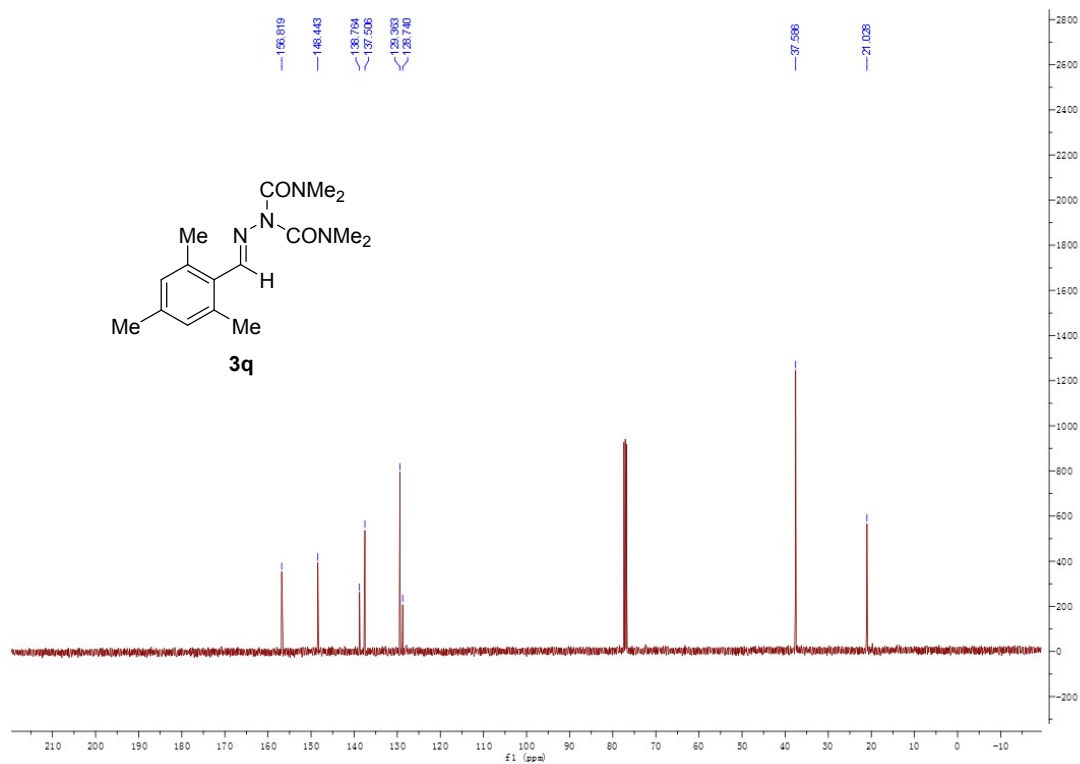



**<sup>1</sup>H NMR (400 MHz, CDCl<sub>3</sub>) spectrum for 3r**

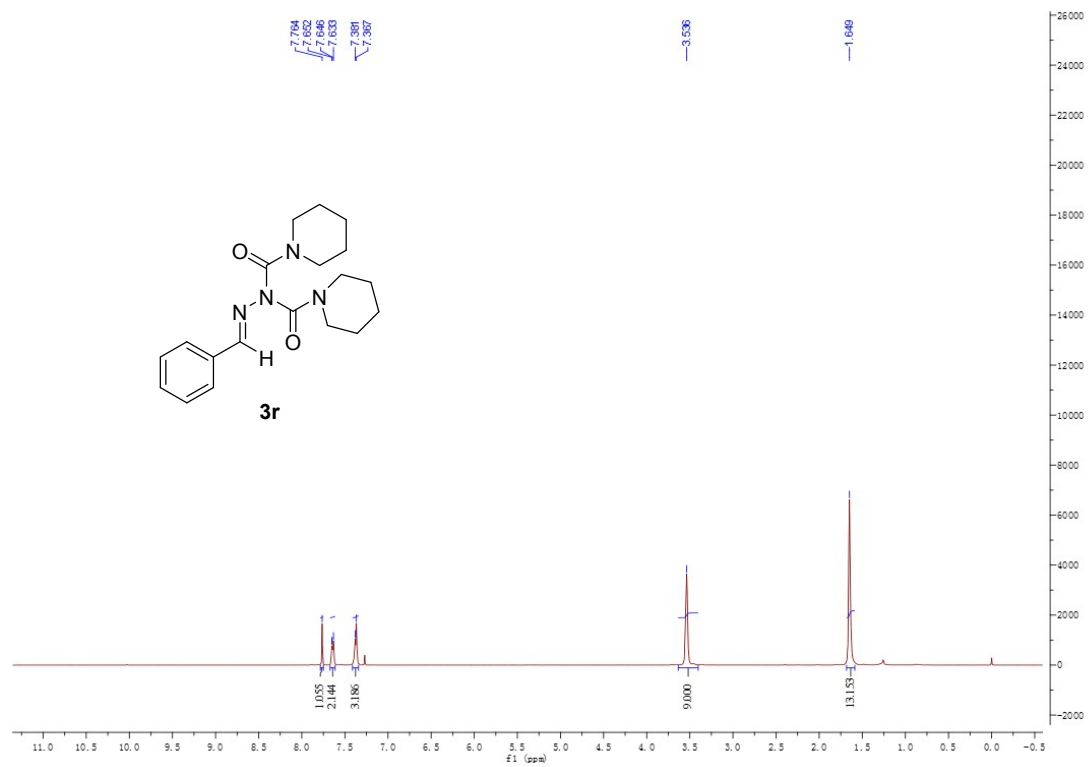

**<sup>13</sup>C NMR (100 MHz, CDCl<sub>3</sub>) spectrum for 3r**

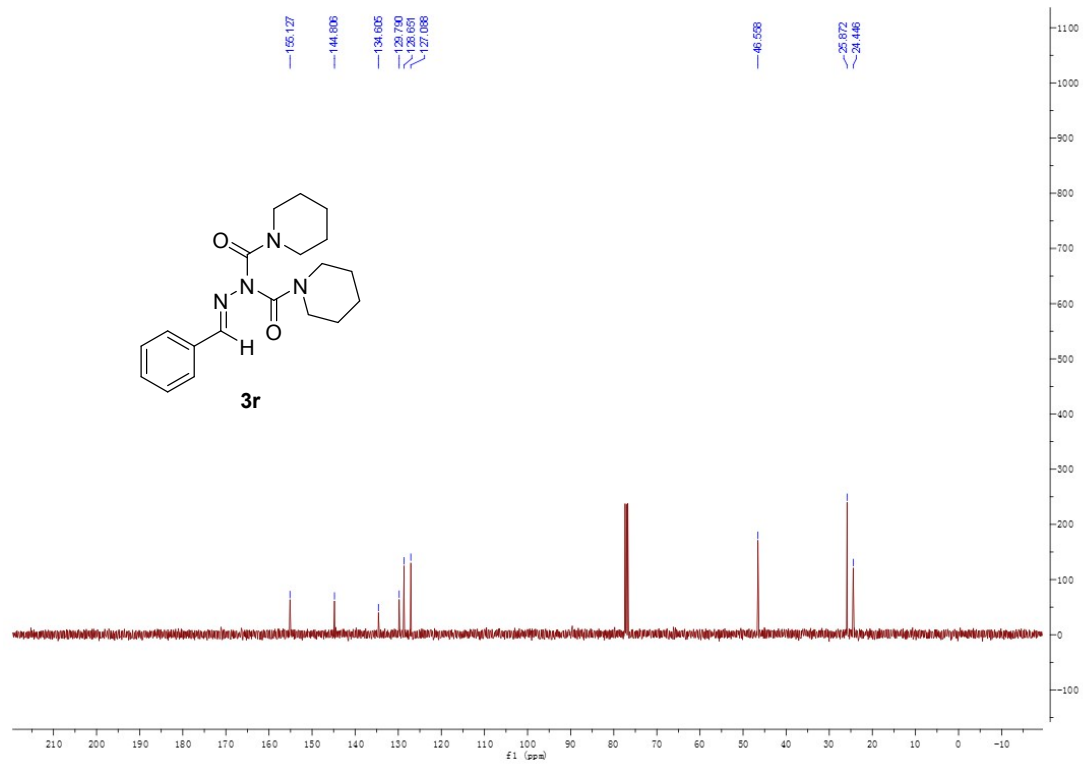

**<sup>1</sup>H NMR (400 MHz, CDCl<sub>3</sub>) spectrum for 5a**

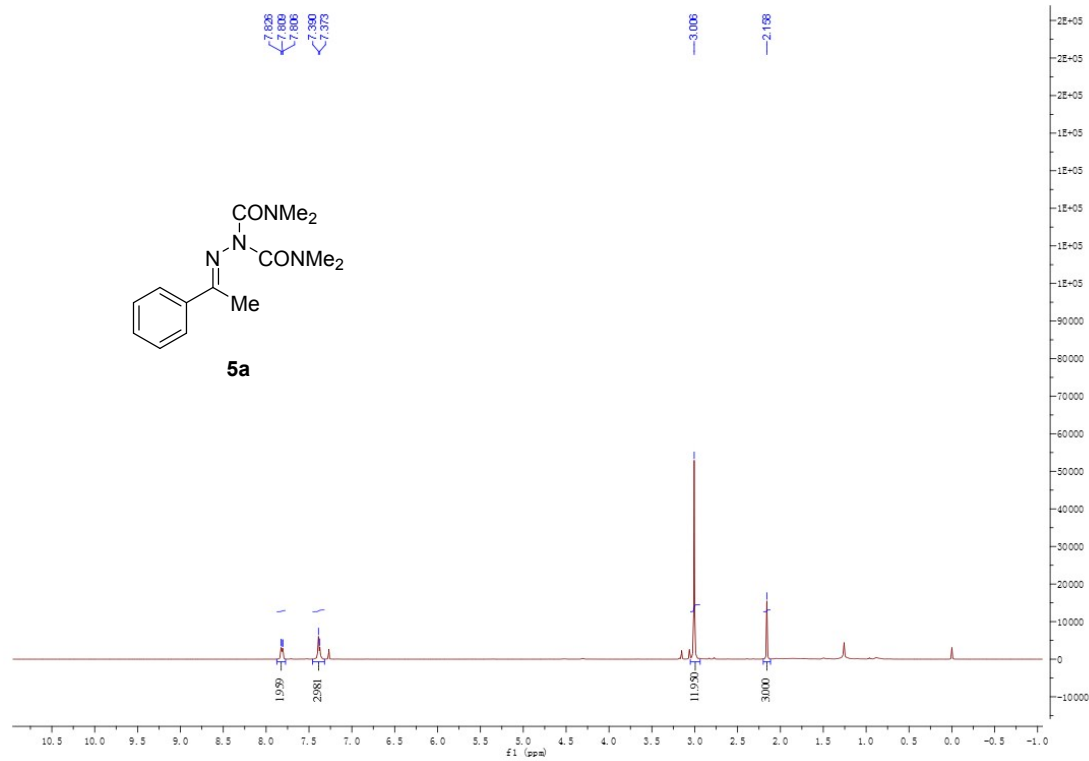

**<sup>13</sup>C NMR (100 MHz, CDCl<sub>3</sub>) spectrum for 5a**

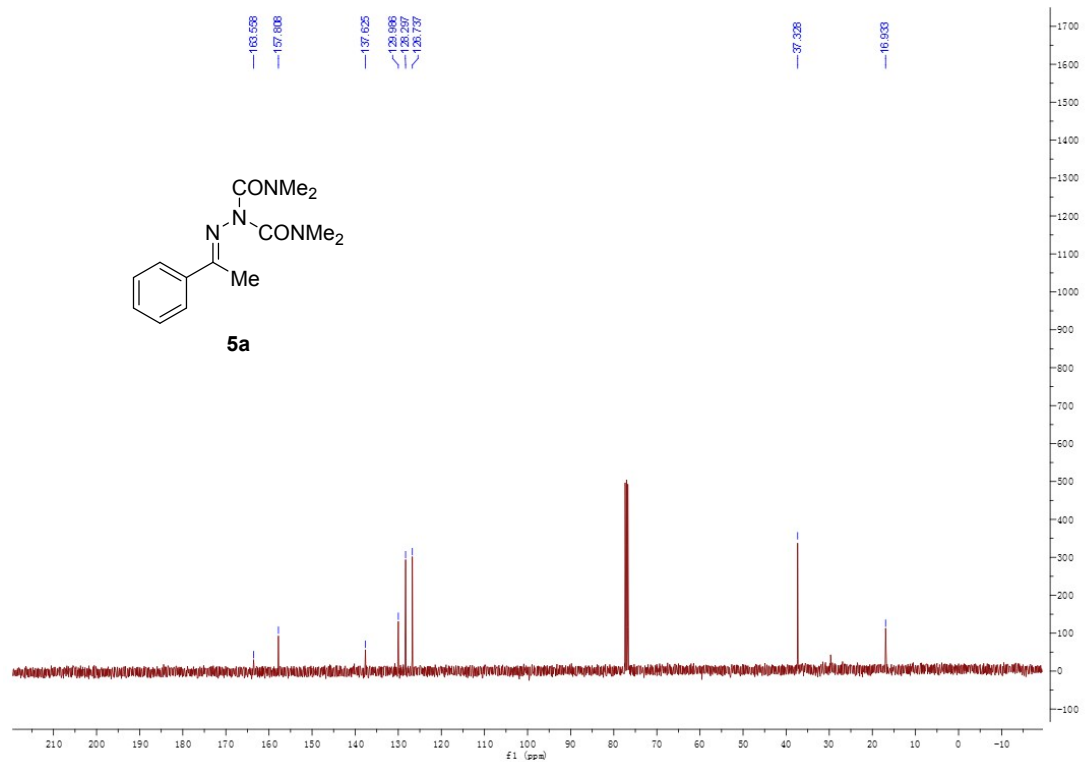

**<sup>1</sup>H NMR (400 MHz, CDCl<sub>3</sub>) spectrum for 5b**

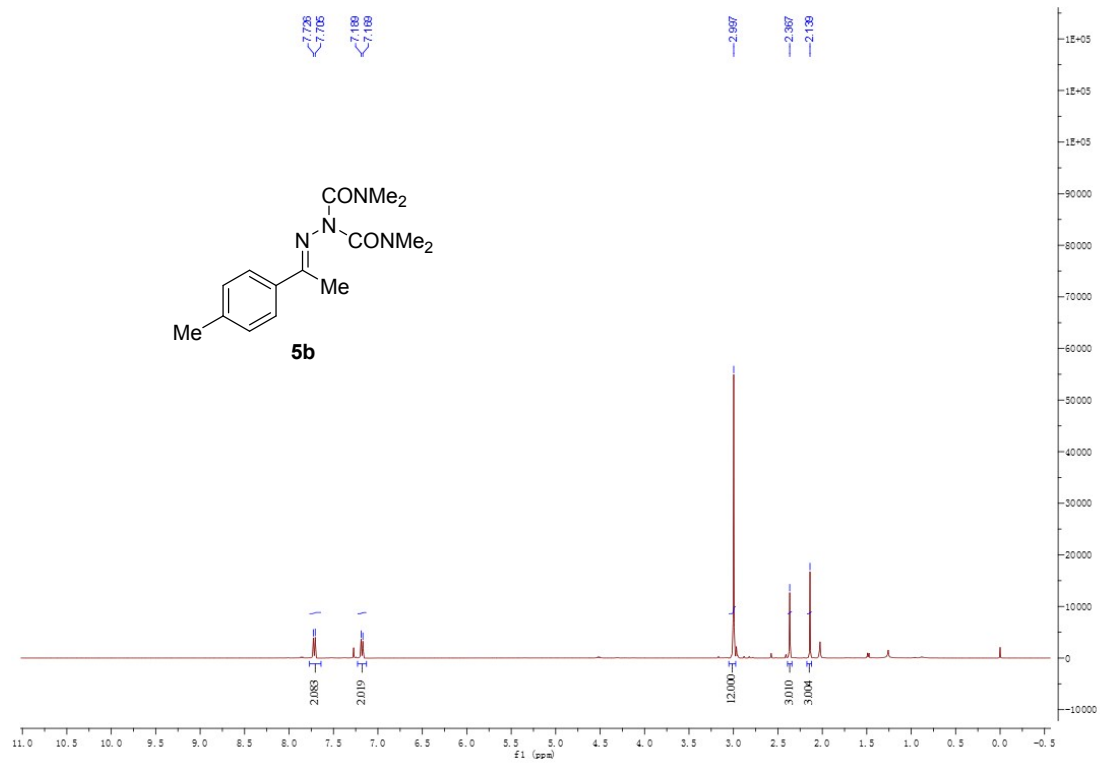

**<sup>13</sup>C NMR (100 MHz, CDCl<sub>3</sub>) spectrum for 5b**

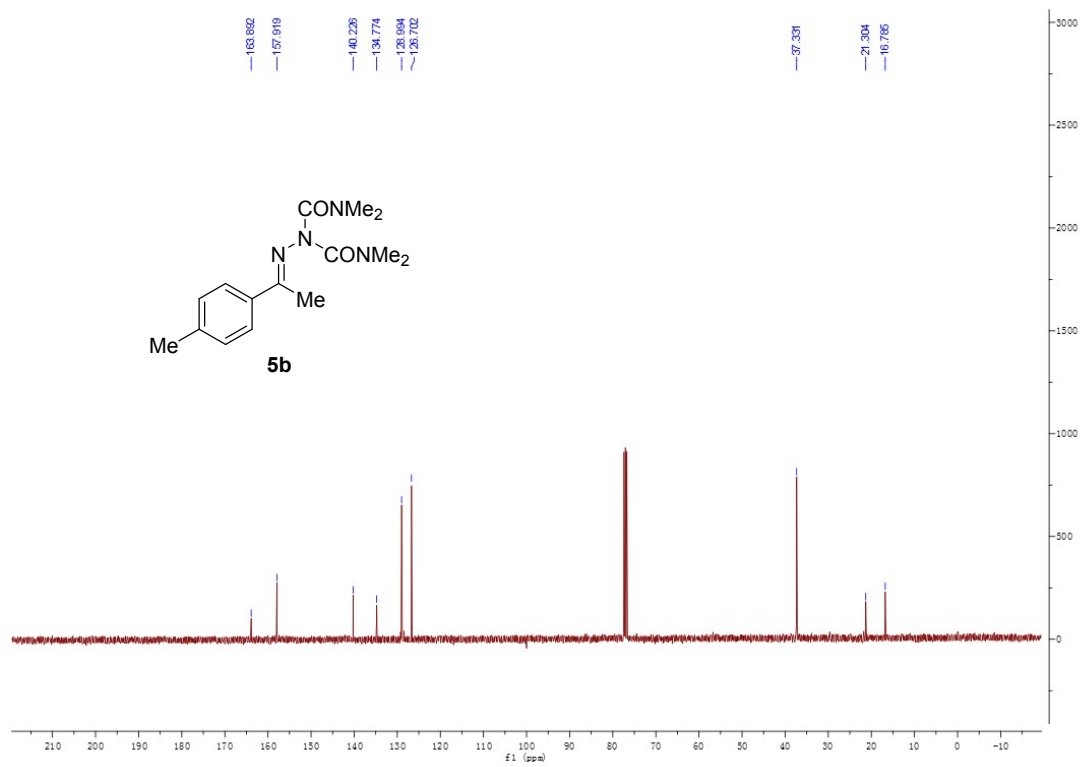

**<sup>1</sup>H NMR (400 MHz, CDCl<sub>3</sub>) spectrum for 5c**

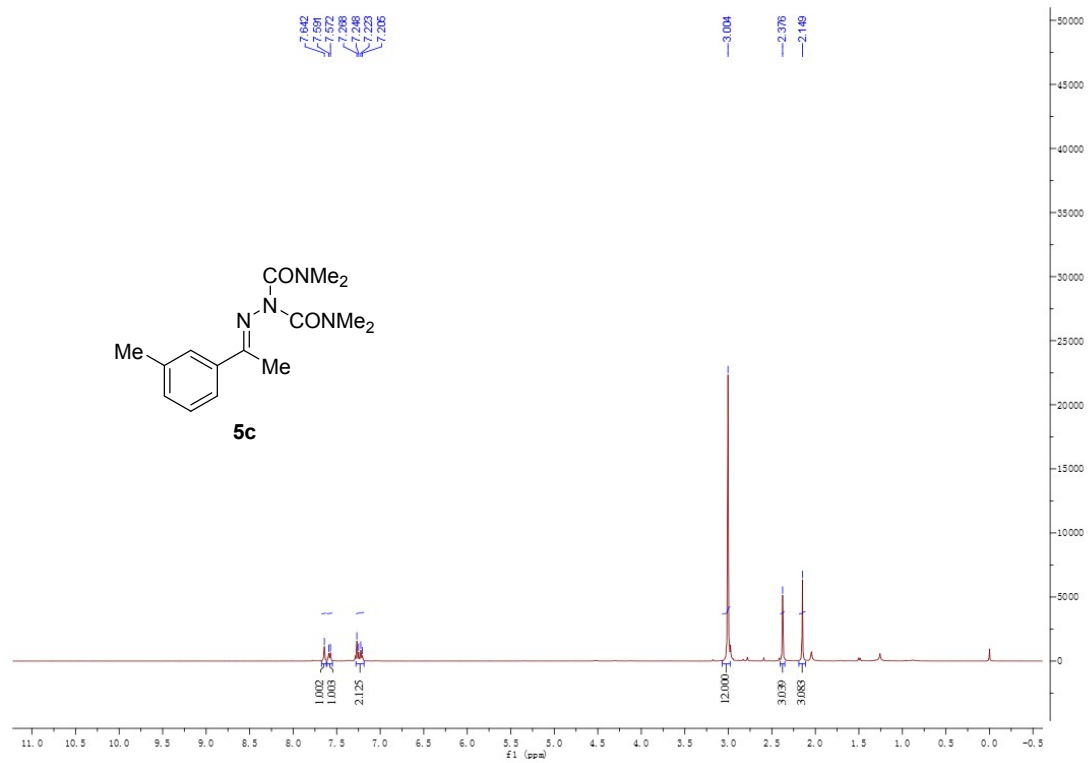

**<sup>13</sup>C NMR (100 MHz, CDCl<sub>3</sub>) spectrum for 5c**

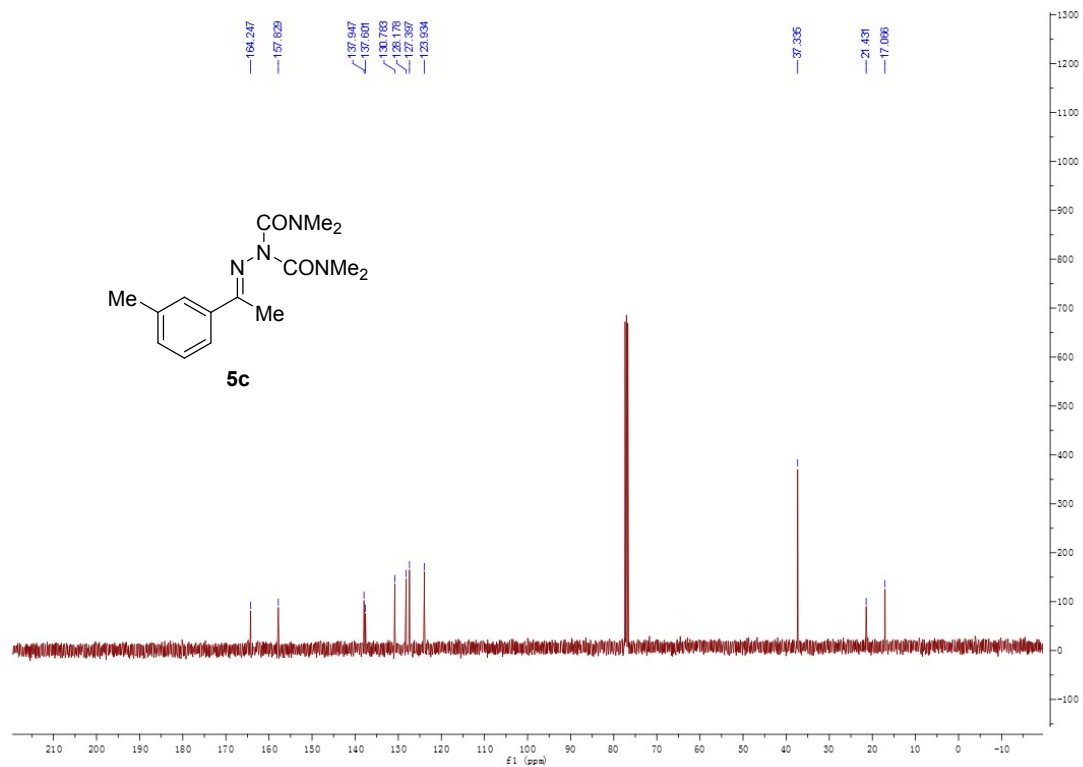

**<sup>1</sup>H NMR (400 MHz, CDCl<sub>3</sub>) spectrum for 5d**

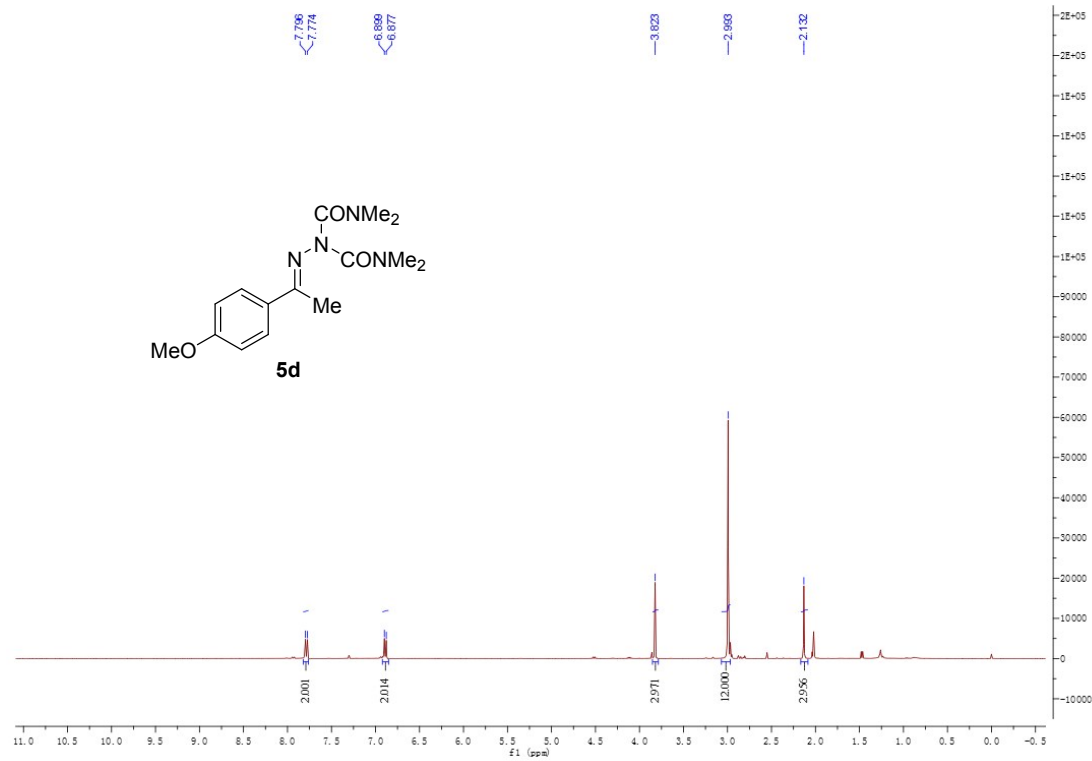

**<sup>13</sup>C NMR (100 MHz, CDCl<sub>3</sub>) spectrum for 5d**

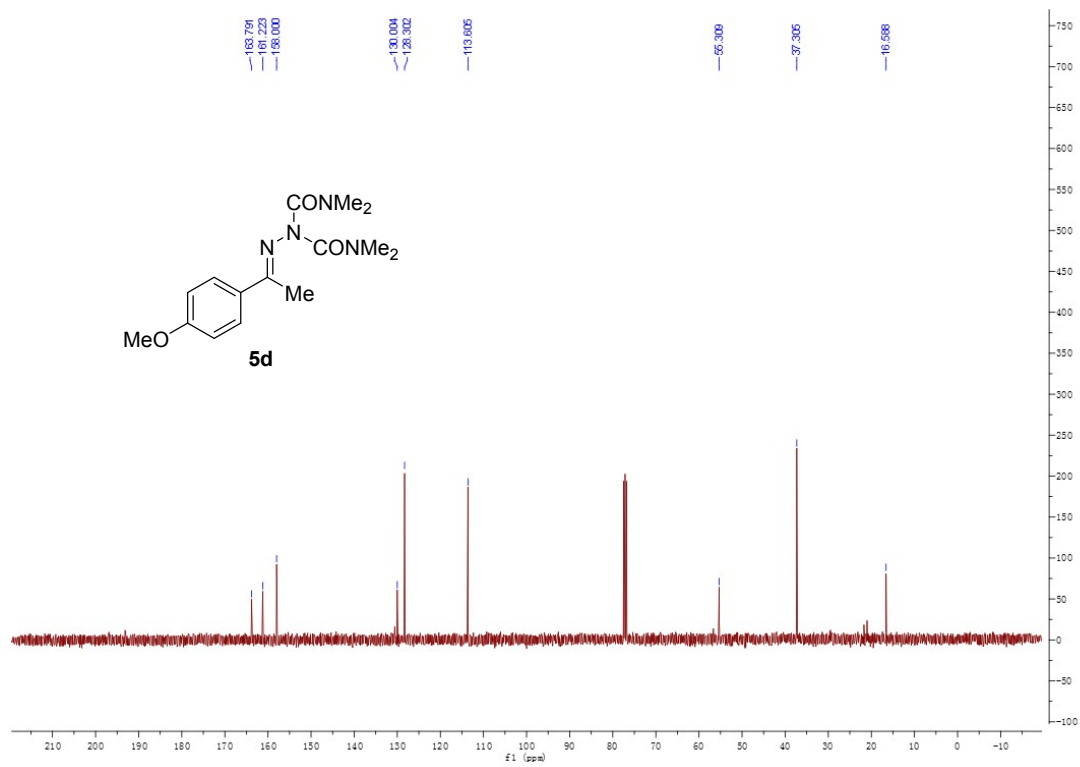

**<sup>1</sup>H NMR (400 MHz, CDCl<sub>3</sub>) spectrum for 5e**

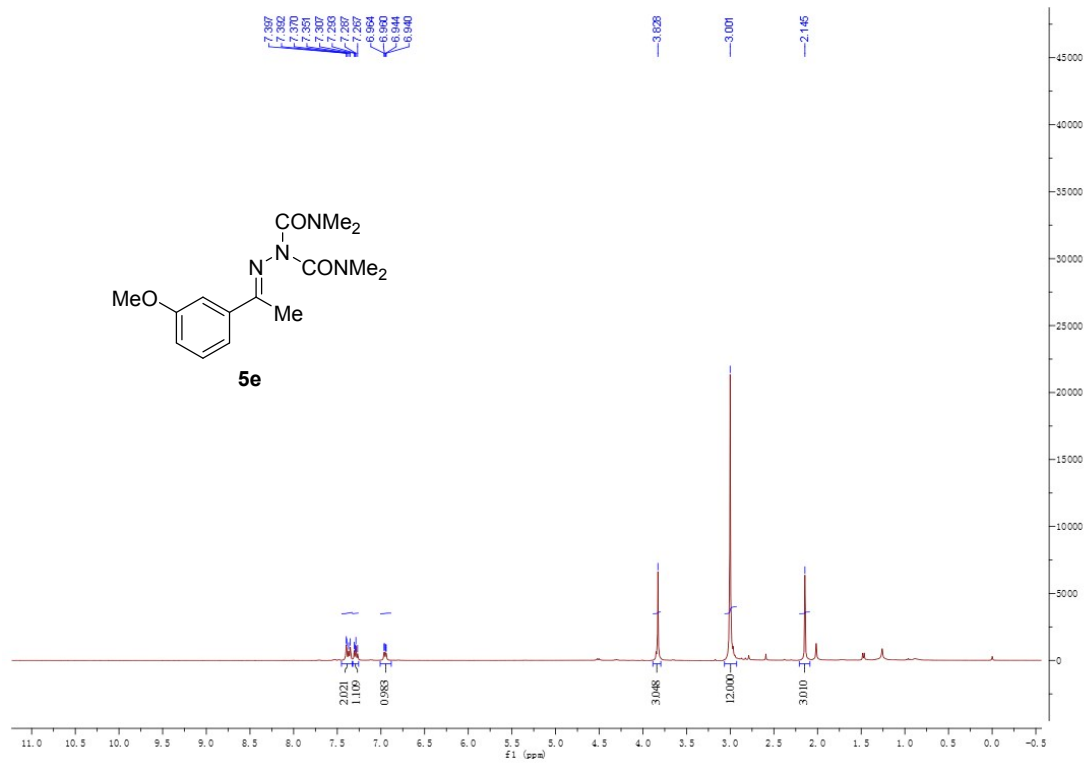

**<sup>13</sup>C NMR (100 MHz, CDCl<sub>3</sub>) spectrum for 5e**

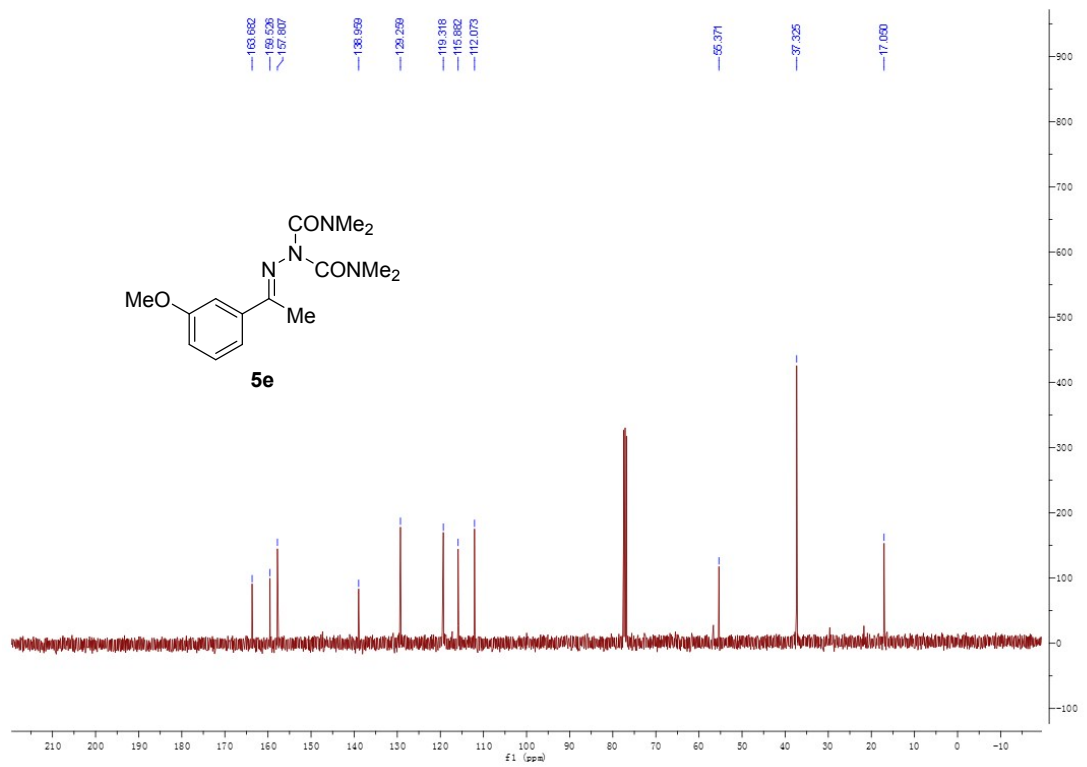

**<sup>1</sup>H NMR (400 MHz, CDCl<sub>3</sub>) spectrum for 5f**

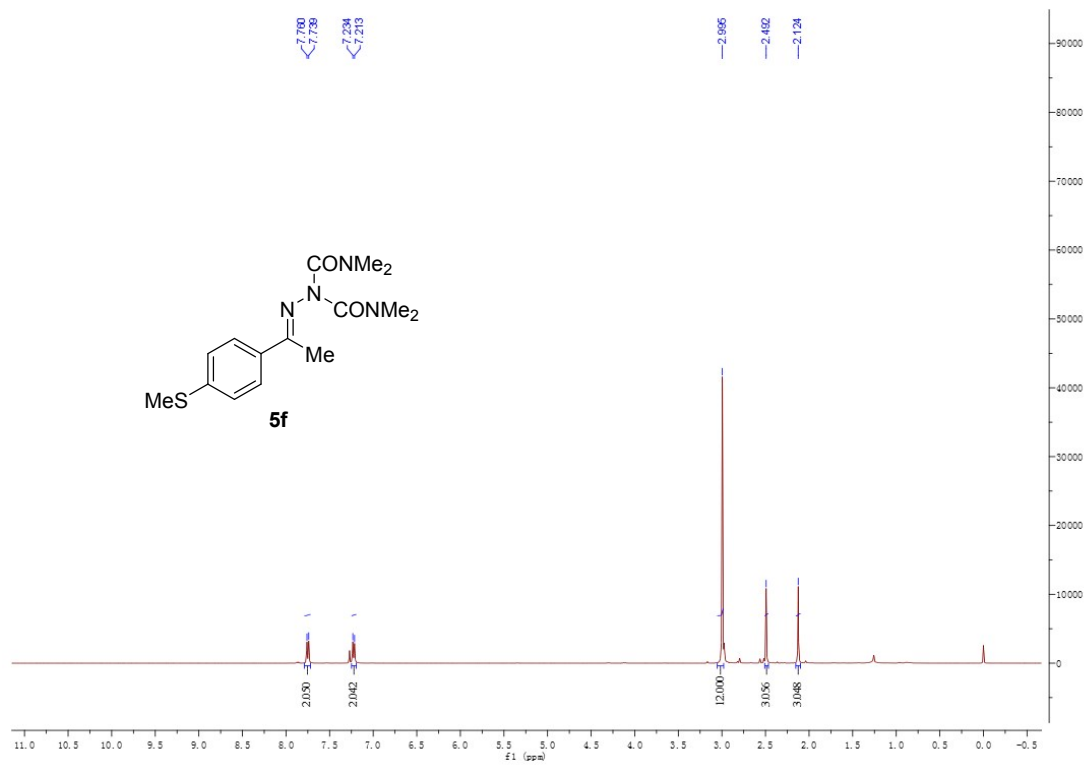

**<sup>13</sup>C NMR (100 MHz, CDCl<sub>3</sub>) spectrum for 5f**

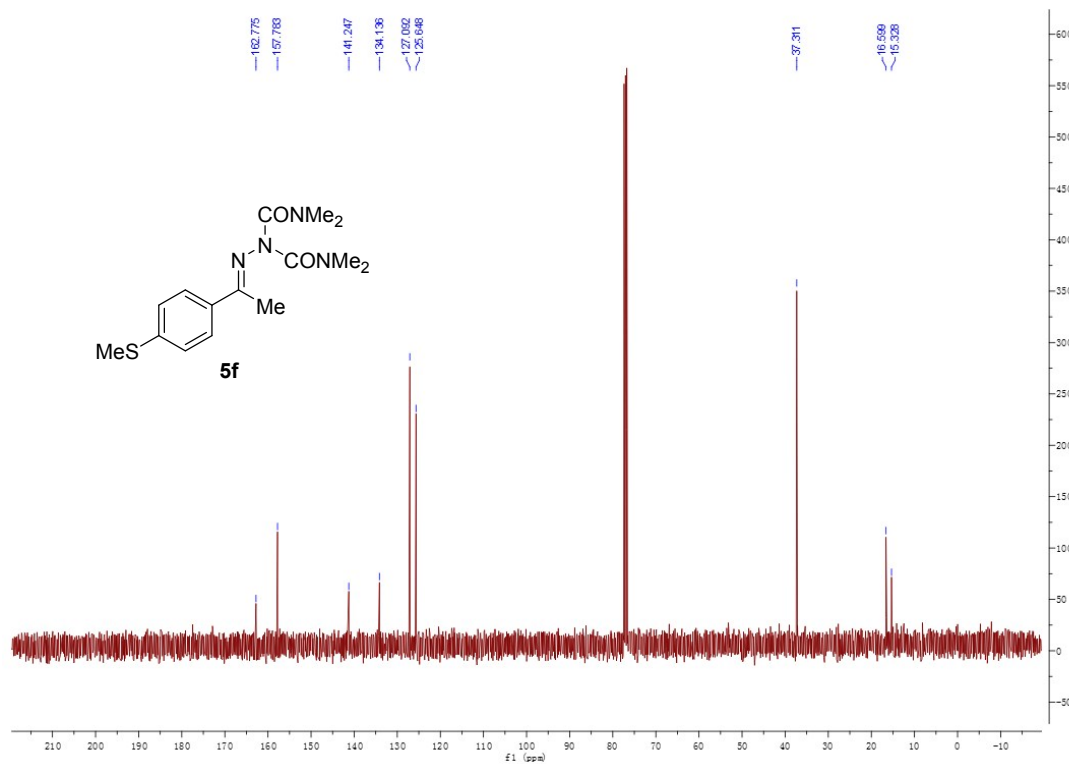

**<sup>1</sup>H NMR (400 MHz, CDCl<sub>3</sub>) spectrum for 5g**

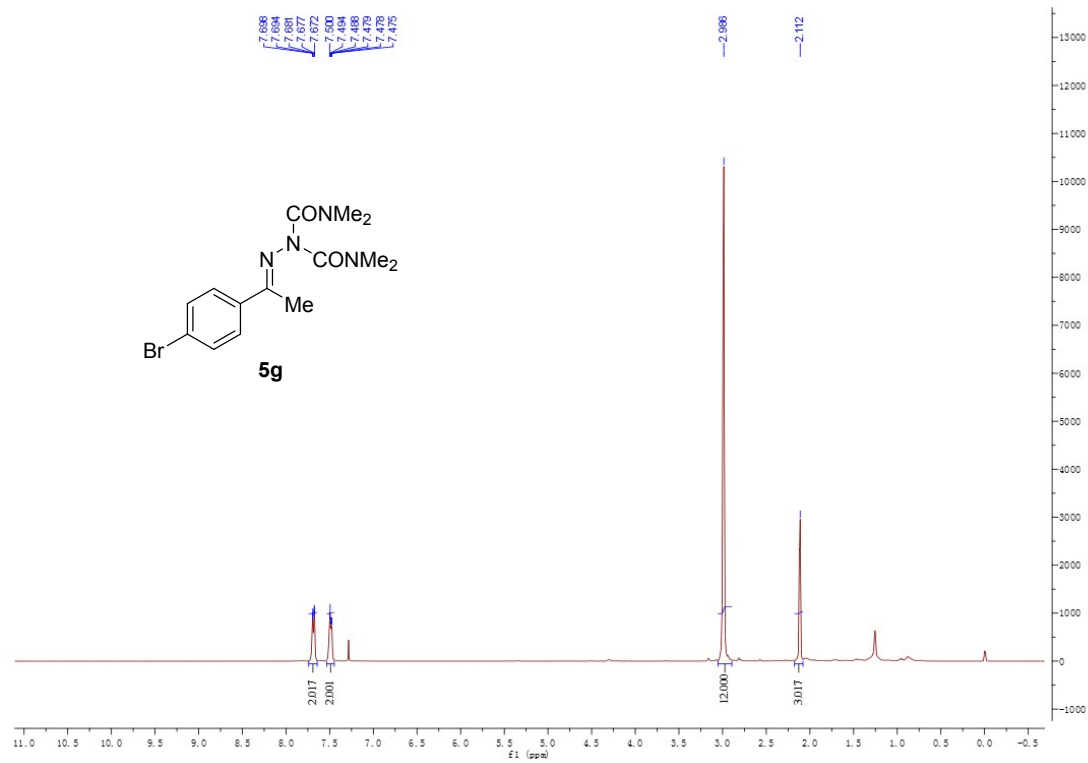

**<sup>13</sup>C NMR (100 MHz, CDCl<sub>3</sub>) spectrum for 5g**

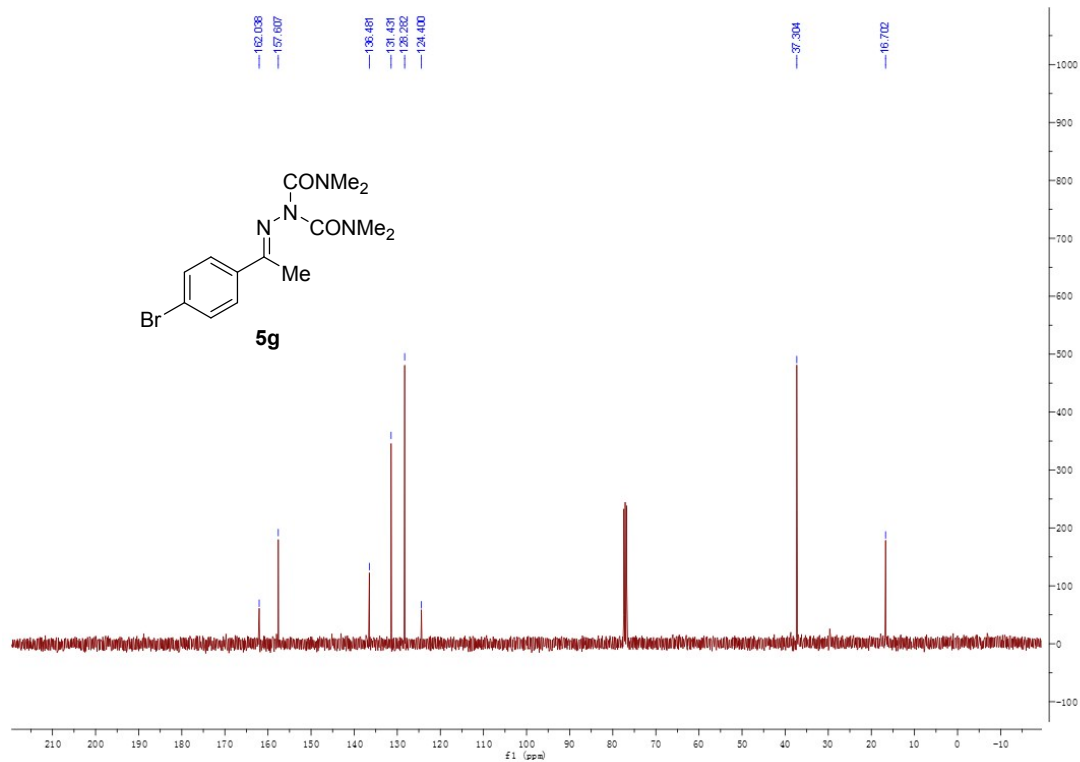



### $^1\text{H}$ NMR (400 MHz, $\text{CDCl}_3$ ) spectrum for 5h

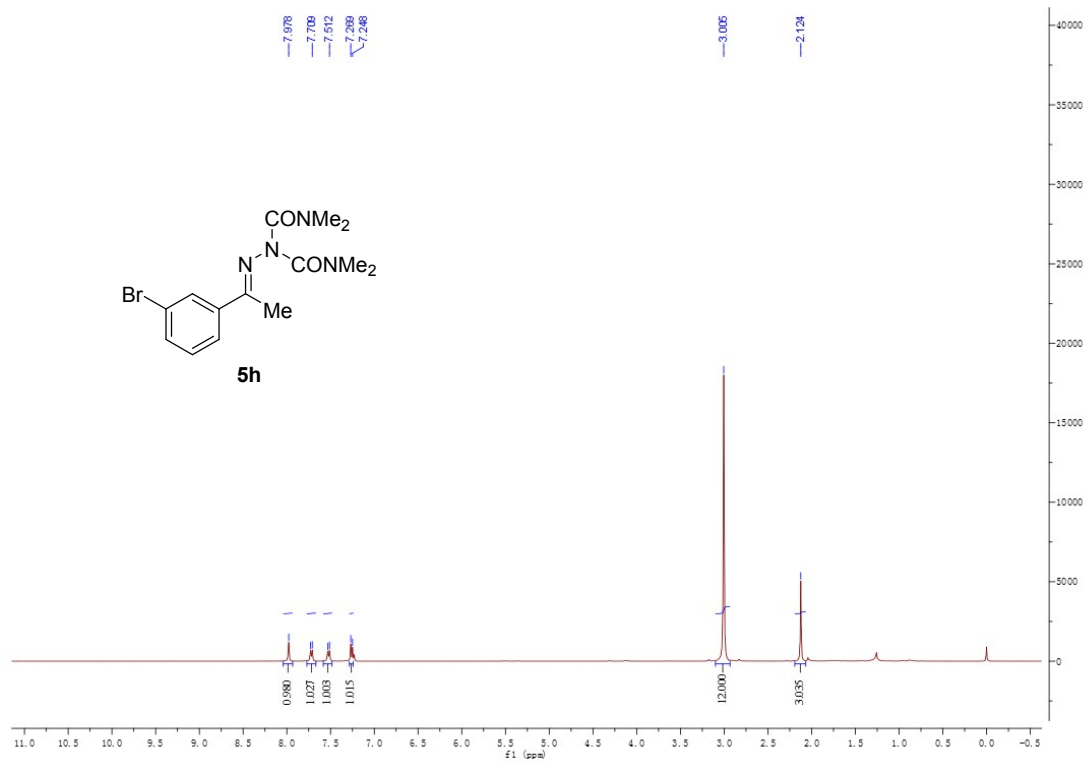

### $^{13}\text{C}$ NMR (100 MHz, $\text{CDCl}_3$ ) spectrum for 5h

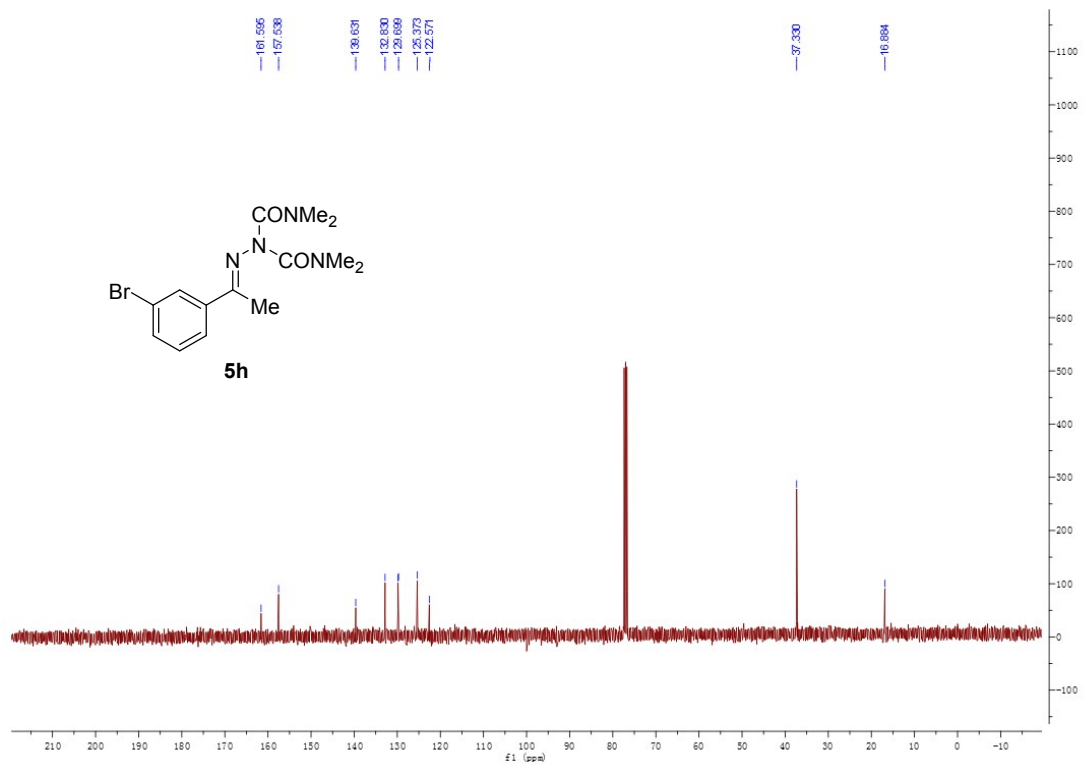

**<sup>1</sup>H NMR (400 MHz, CDCl<sub>3</sub>) spectrum for 5i**

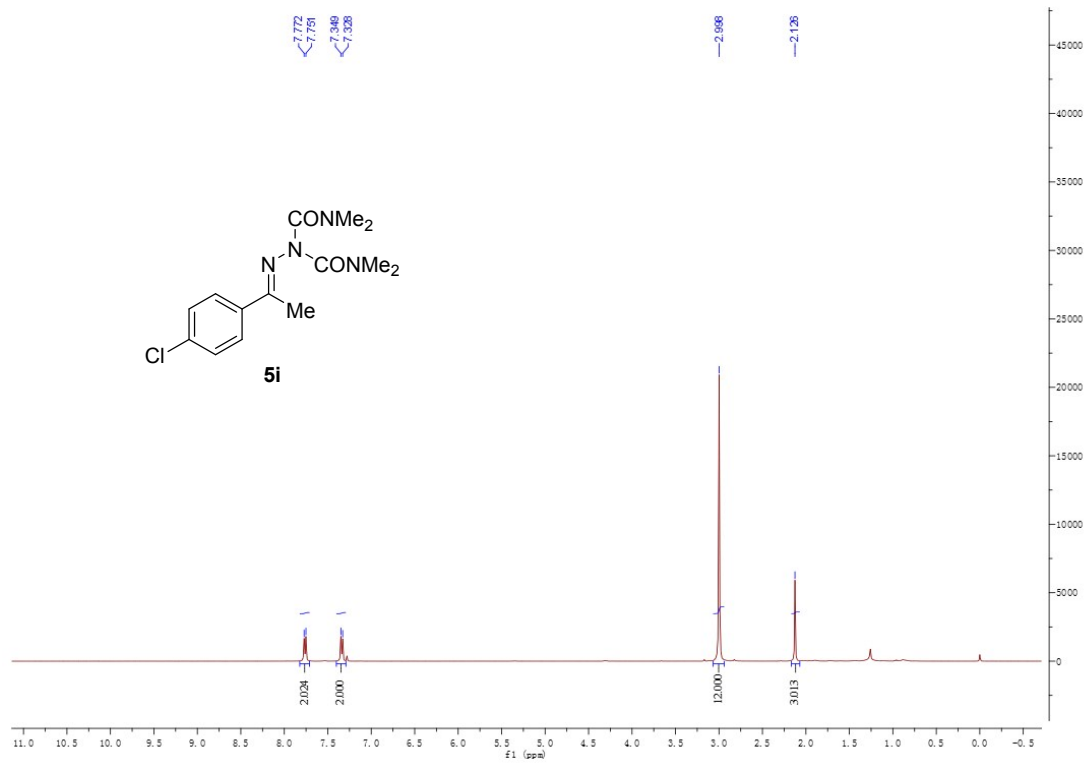

**<sup>13</sup>C NMR (100 MHz, CDCl<sub>3</sub>) spectrum for 5i**

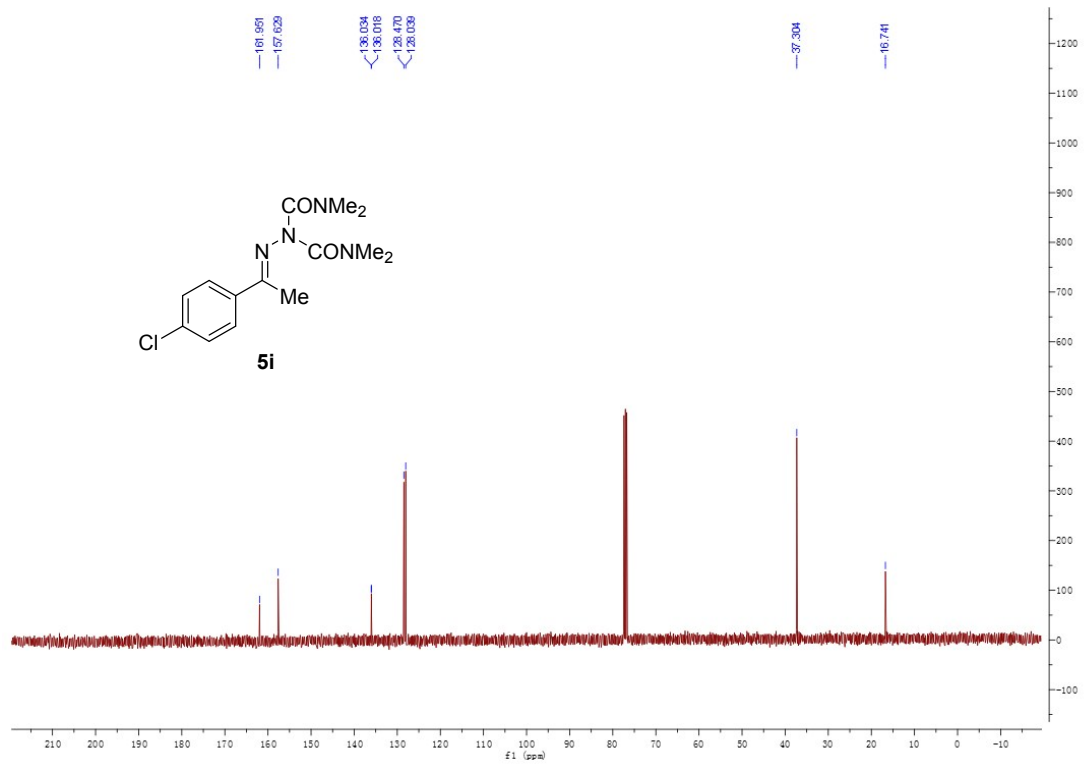



**<sup>1</sup>H NMR (400 MHz, CDCl<sub>3</sub>) spectrum for 5k**

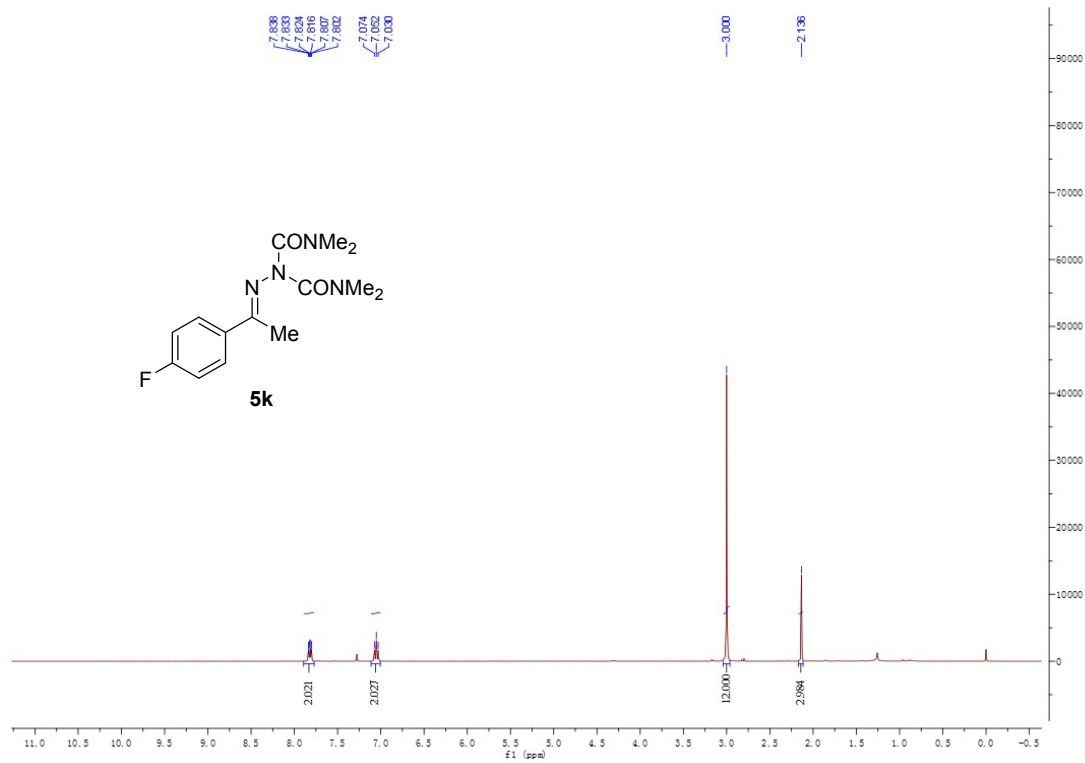

**<sup>13</sup>C NMR (100 MHz, CDCl<sub>3</sub>) spectrum for 5k**

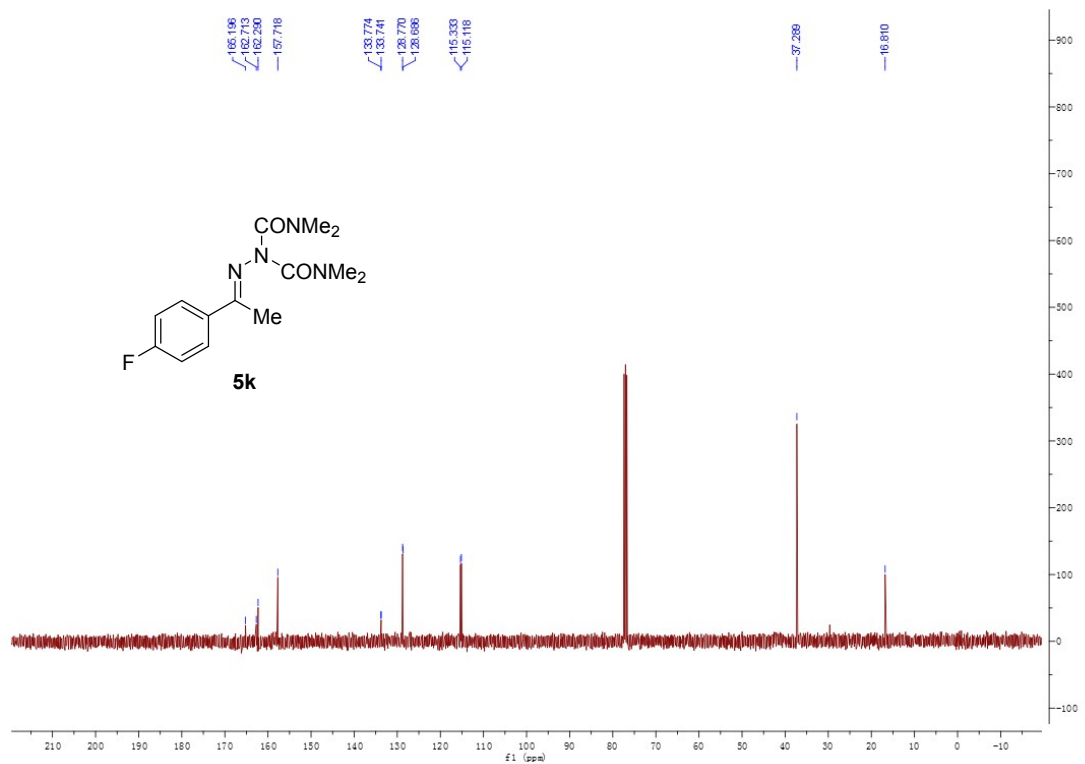

**<sup>1</sup>H NMR (400 MHz, CDCl<sub>3</sub>) spectrum for 51**

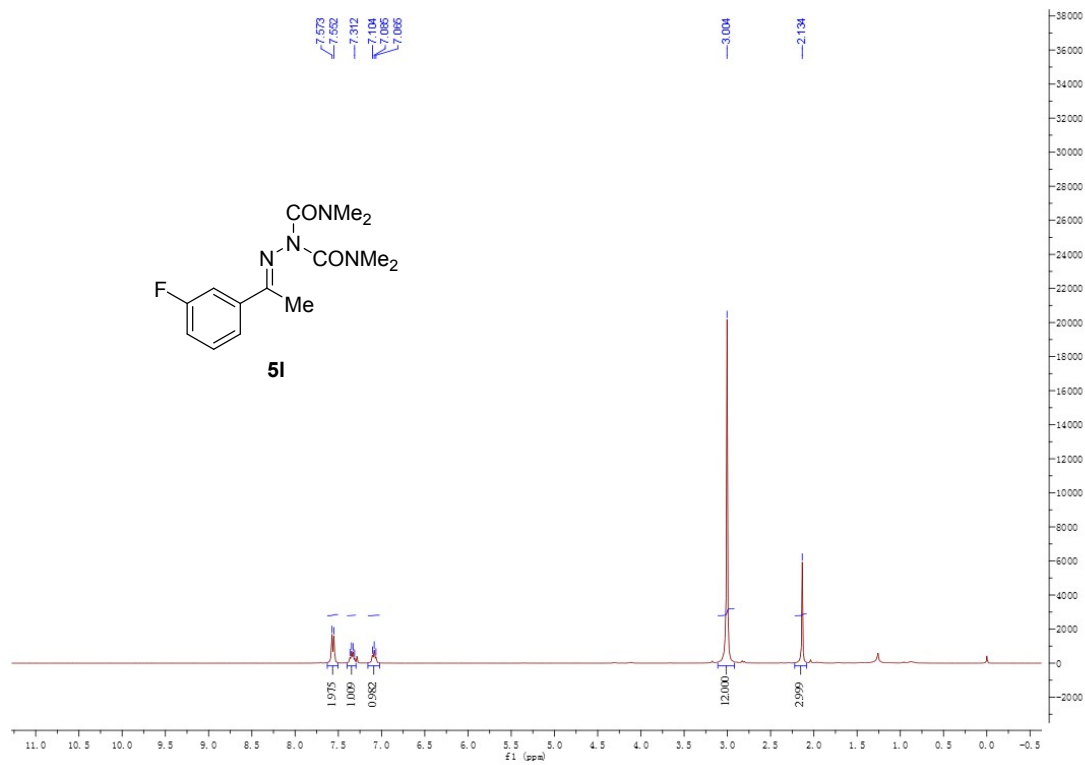

**<sup>13</sup>C NMR (100 MHz, CDCl<sub>3</sub>) spectrum for 51**

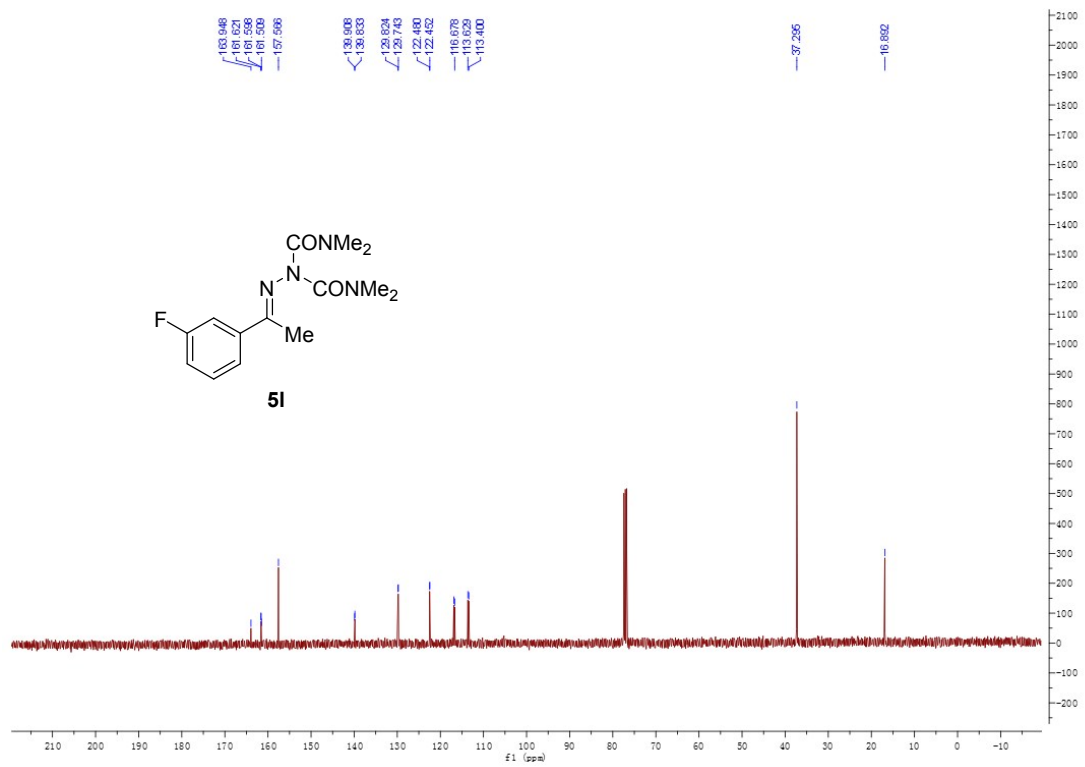

**<sup>1</sup>H NMR (400 MHz, CDCl<sub>3</sub>) spectrum for 5m**

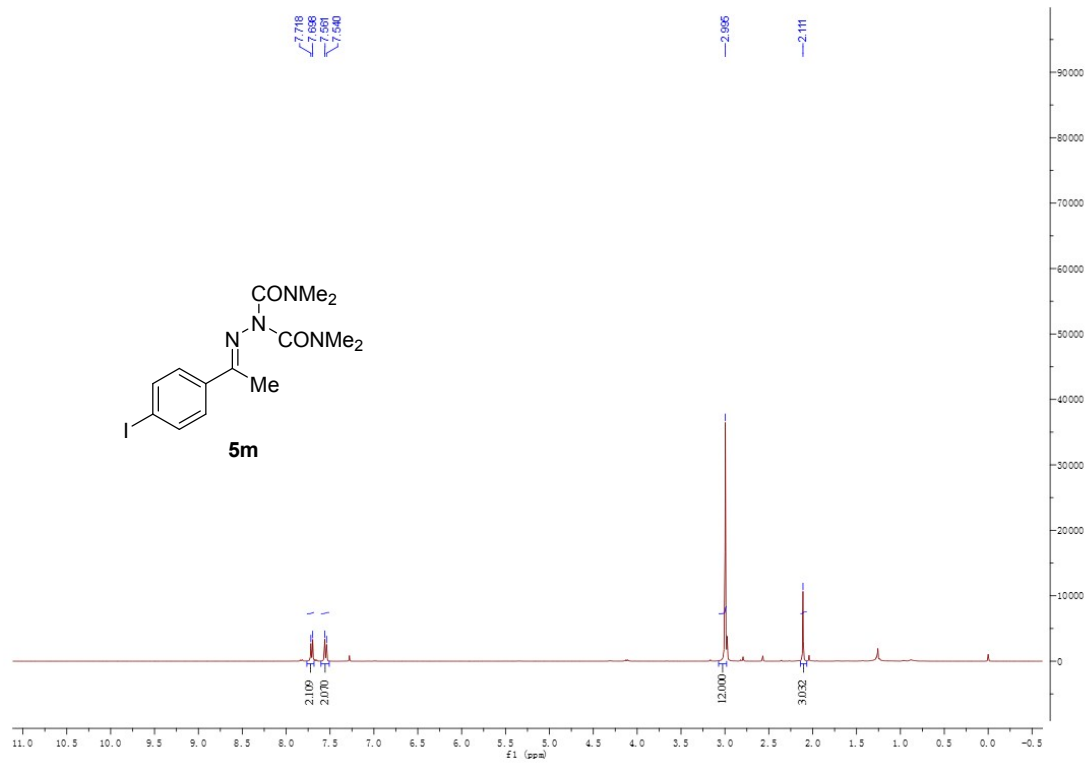

**<sup>13</sup>C NMR (100 MHz, CDCl<sub>3</sub>) spectrum for 5m**

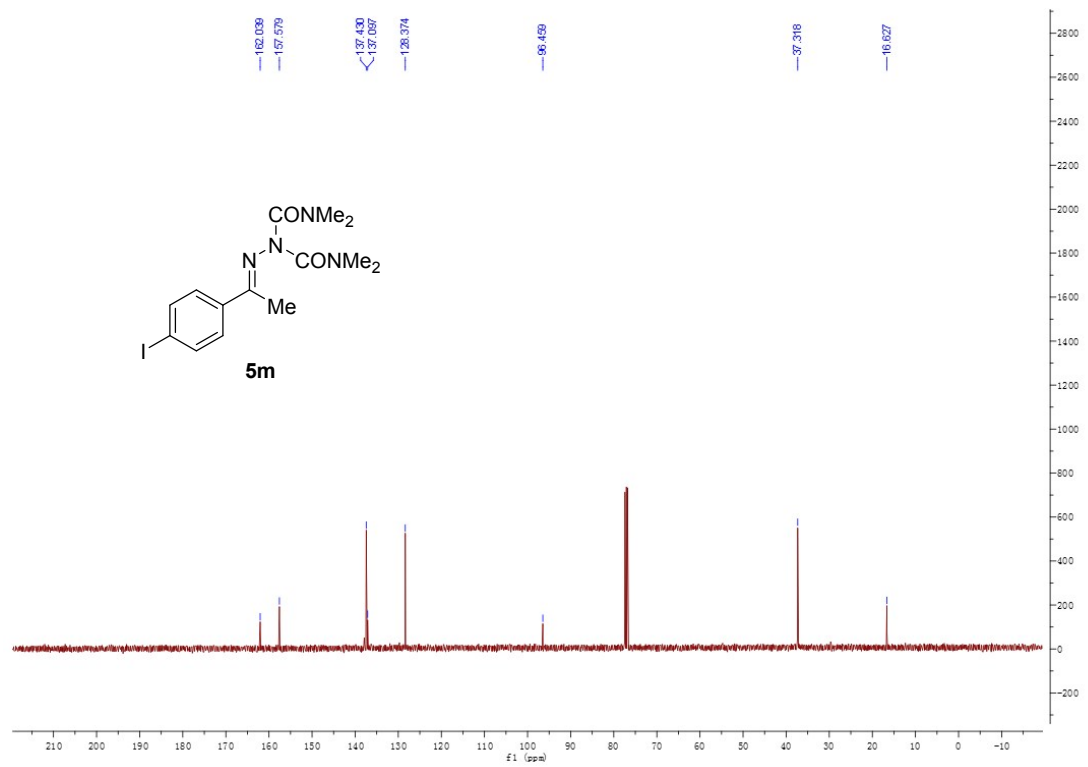

**<sup>1</sup>H NMR (400 MHz, CDCl<sub>3</sub>) spectrum for 5n**

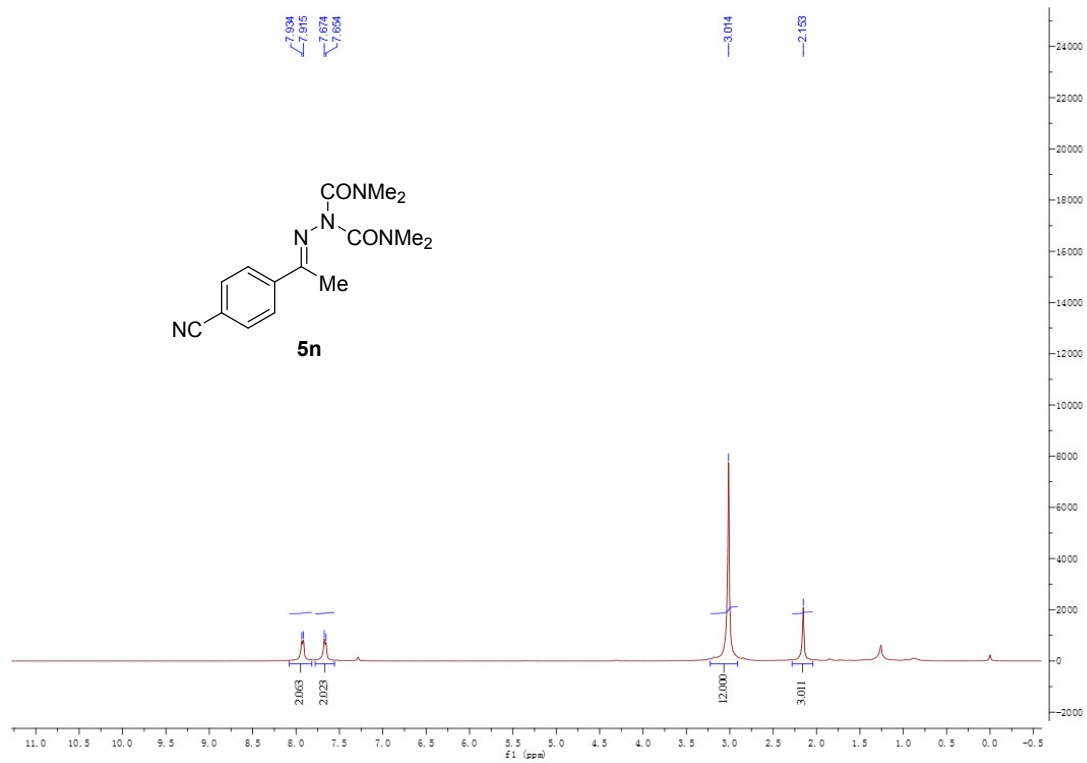

**<sup>13</sup>C NMR (100 MHz, CDCl<sub>3</sub>) spectrum for 5n**

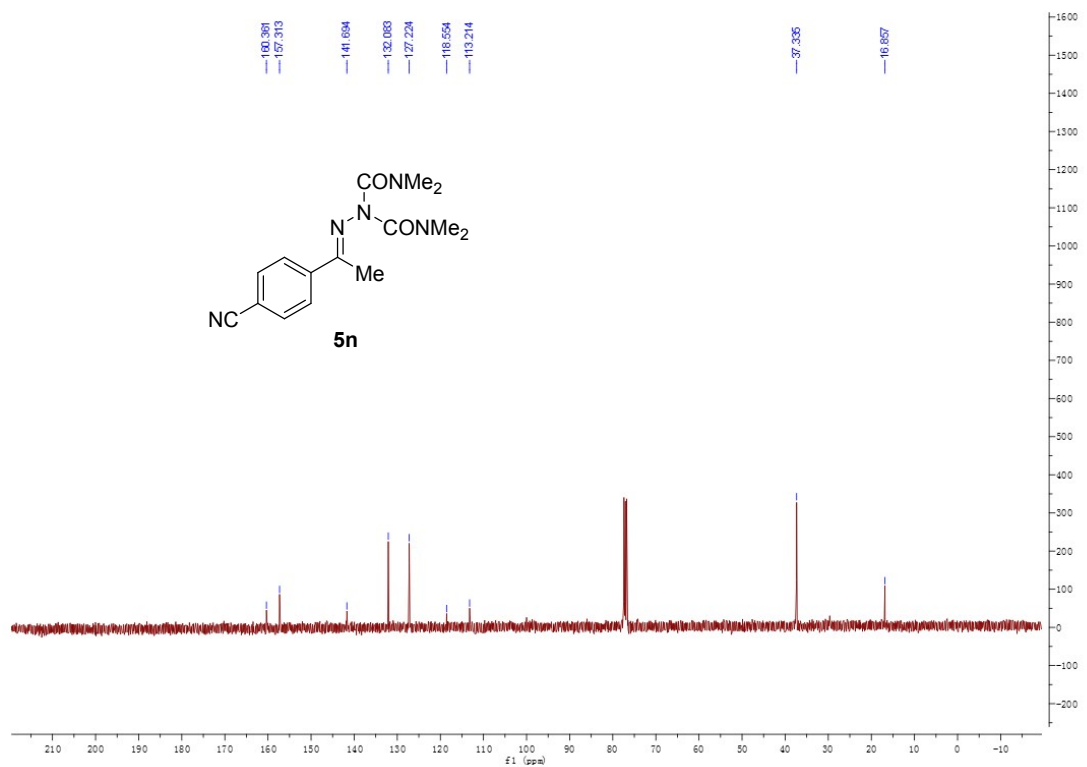

### $^1\text{H}$ NMR (400 MHz, $\text{CDCl}_3$ ) spectrum for **5o**

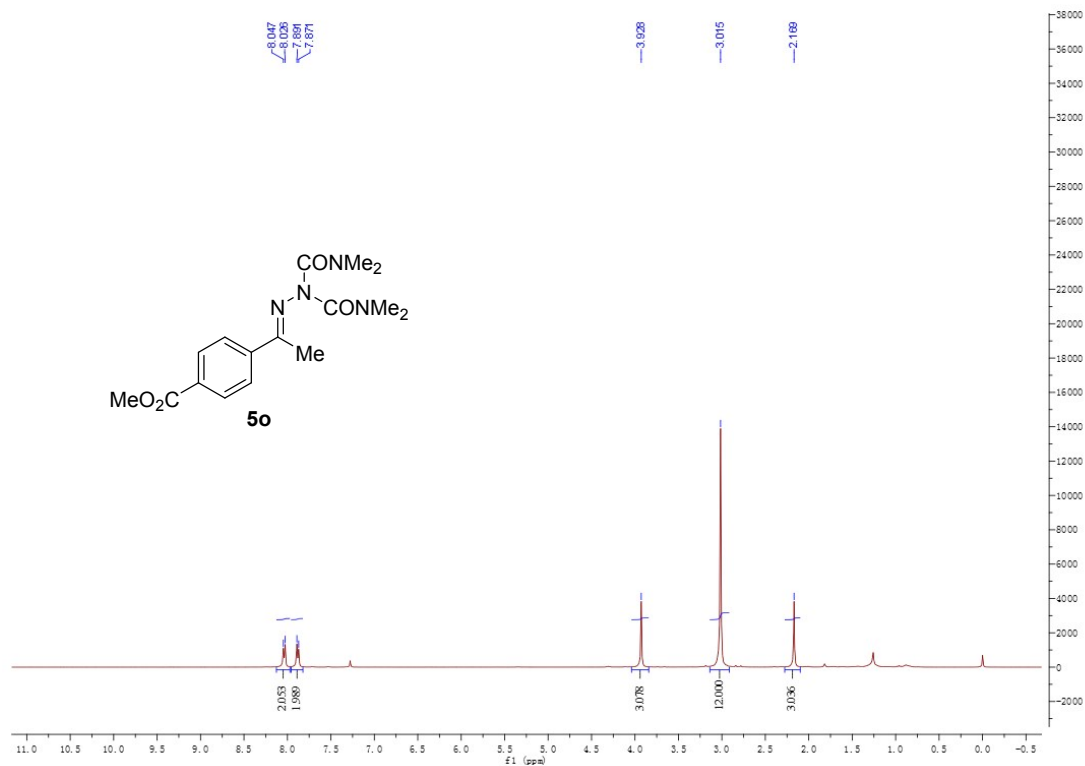

### $^{13}\text{C}$ NMR (100 MHz, $\text{CDCl}_3$ ) spectrum for **5o**

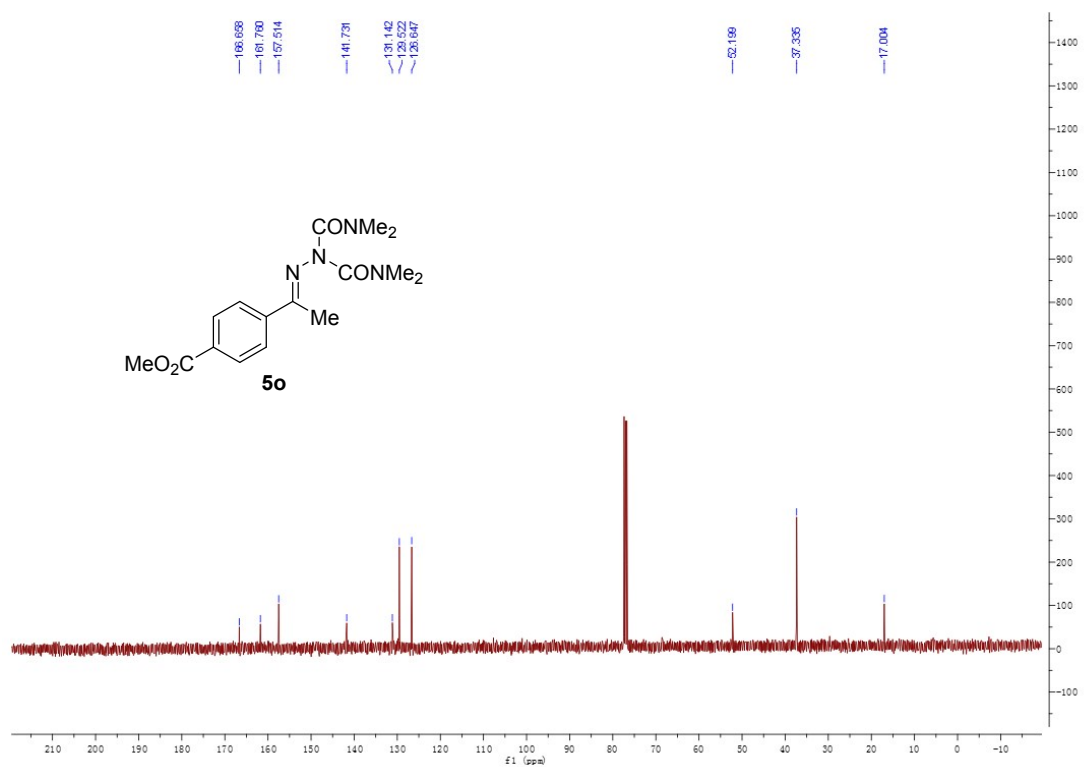



**<sup>1</sup>H NMR (400 MHz, CDCl<sub>3</sub>) spectrum for 5p**

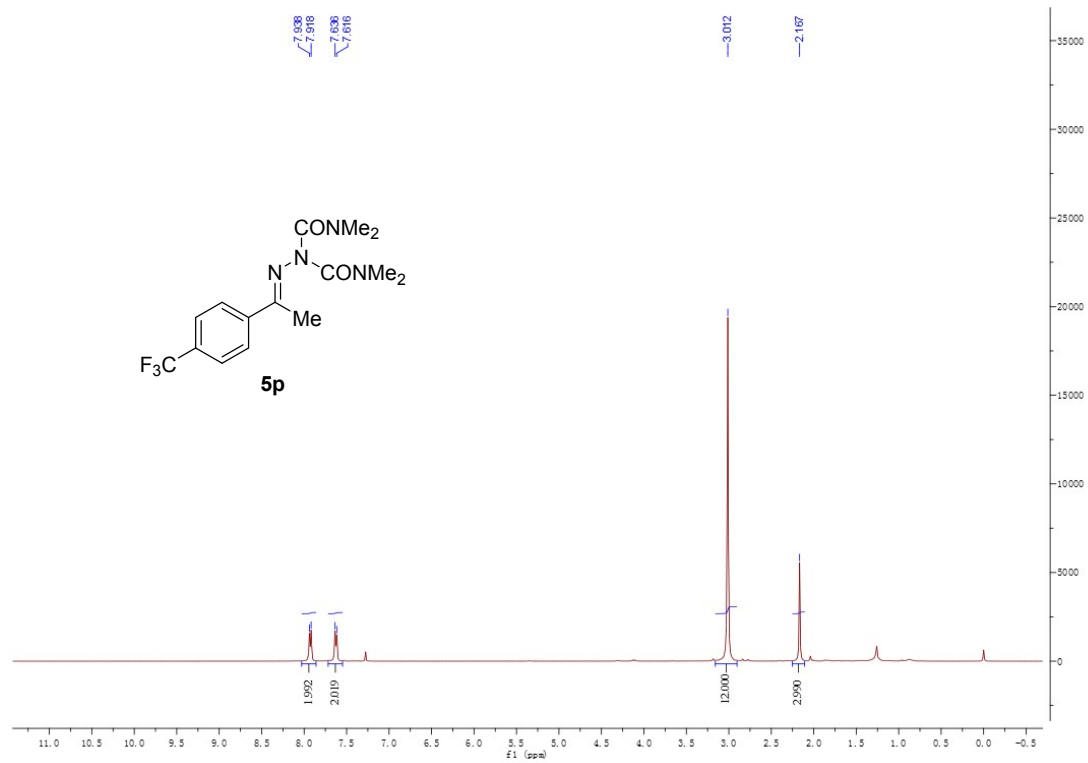

**<sup>13</sup>C NMR (100 MHz, CDCl<sub>3</sub>) spectrum for 5p**

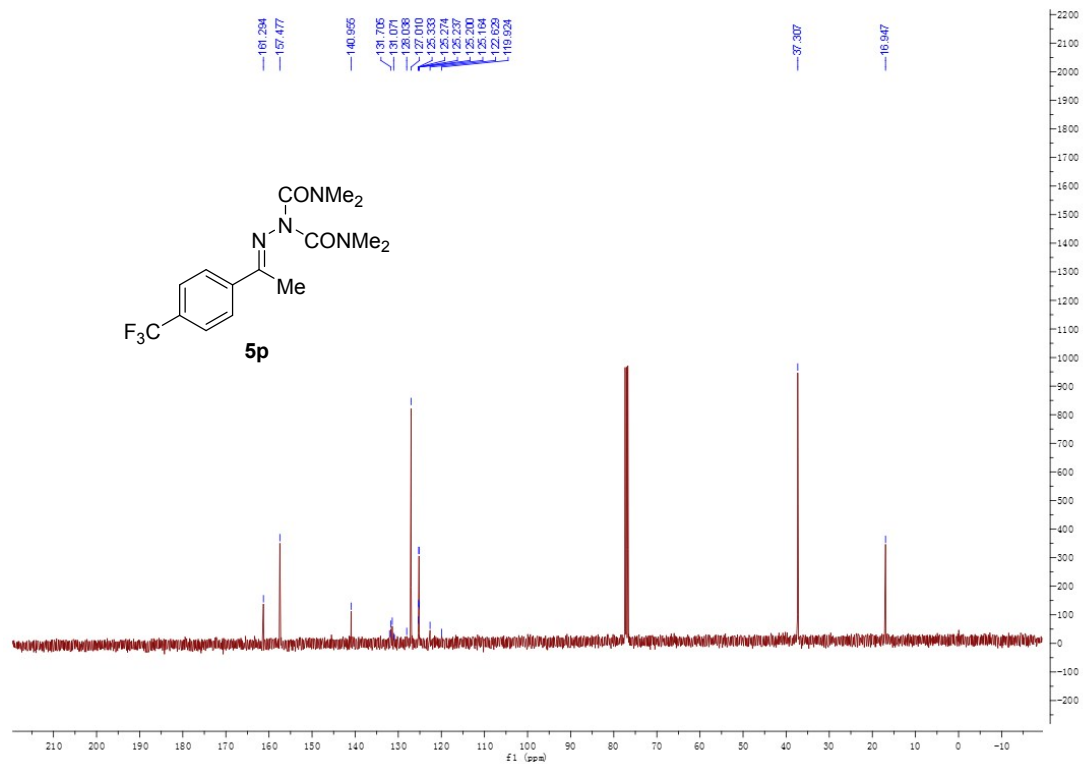

**<sup>1</sup>H NMR (400 MHz, CDCl<sub>3</sub>) spectrum for 5q**

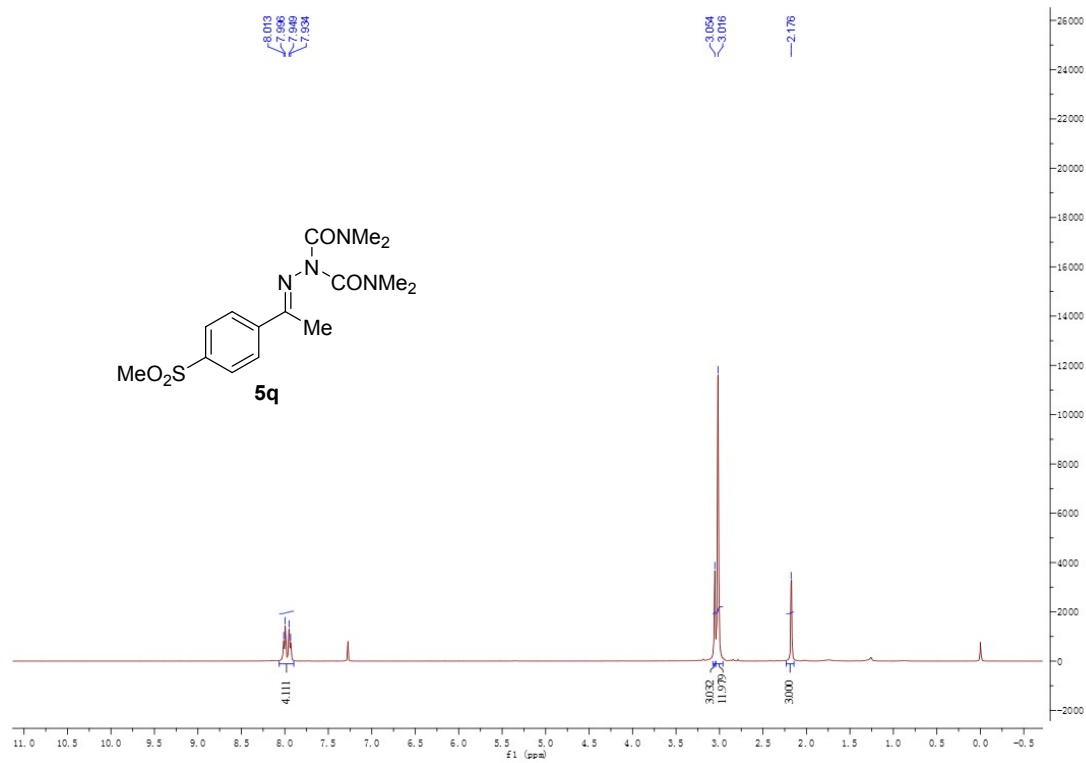

**<sup>13</sup>C NMR (100 MHz, CDCl<sub>3</sub>) spectrum for 5q**

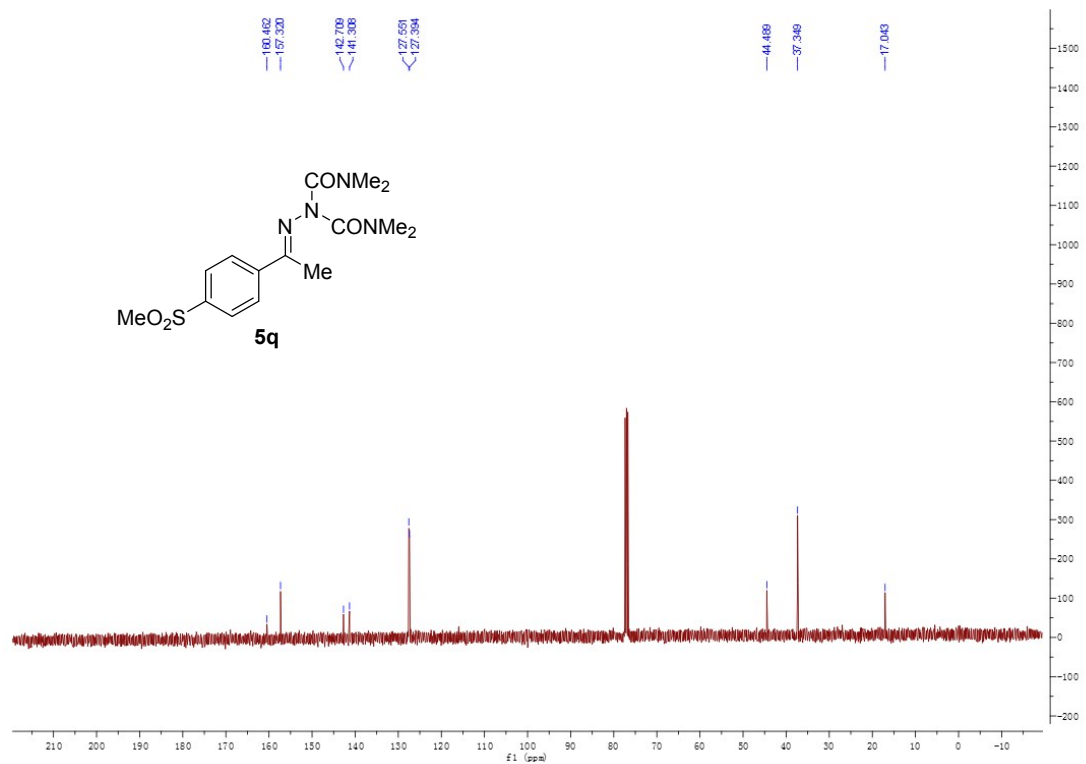

**<sup>1</sup>H NMR (400 MHz, CDCl<sub>3</sub>) spectrum for 5r**

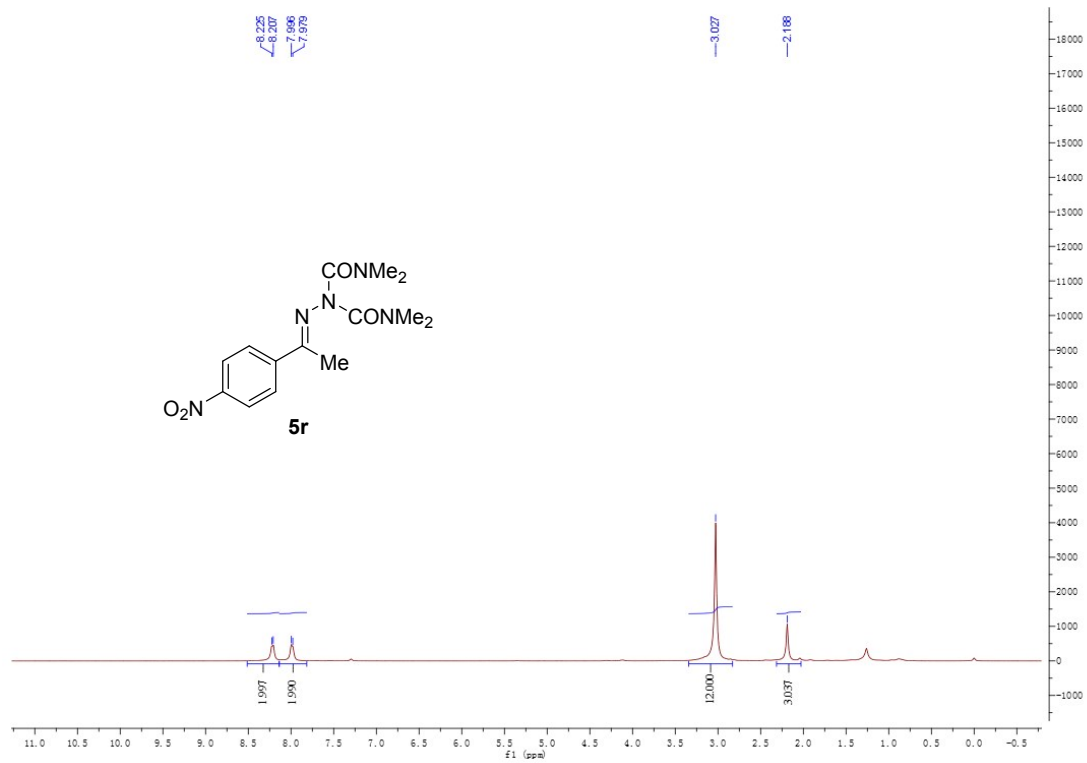

**<sup>13</sup>C NMR (100 MHz, CDCl<sub>3</sub>) spectrum for 5r**

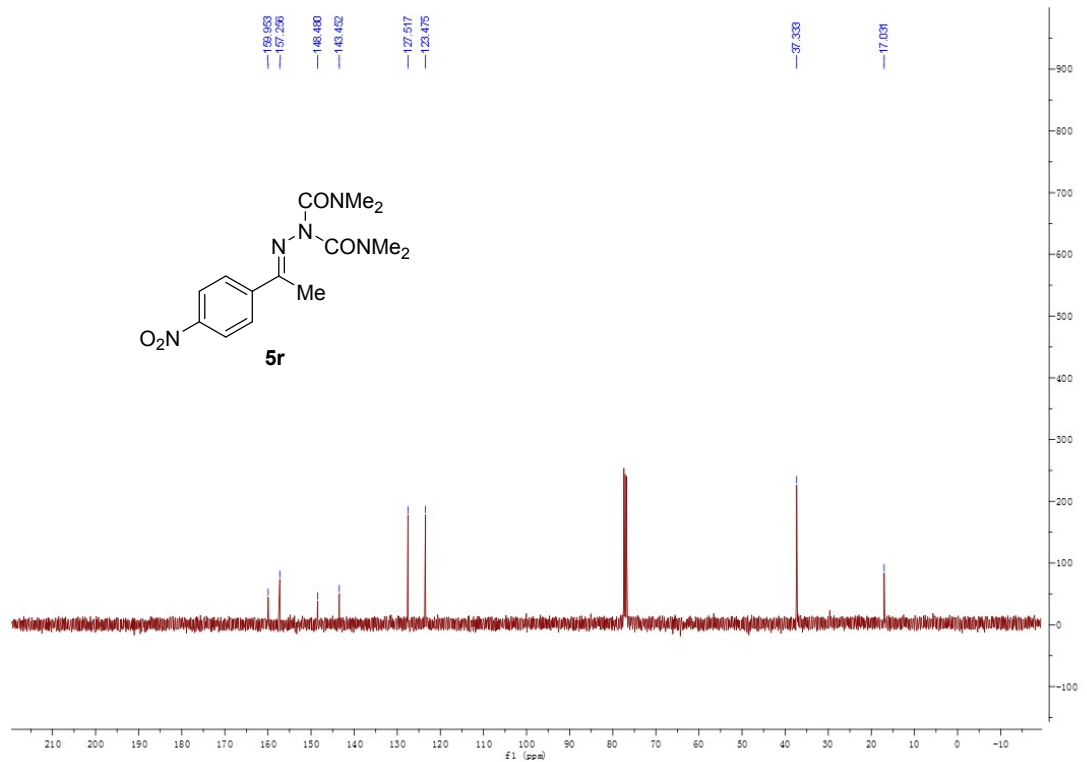

**<sup>1</sup>H NMR (400 MHz, CDCl<sub>3</sub>) spectrum for 5s**

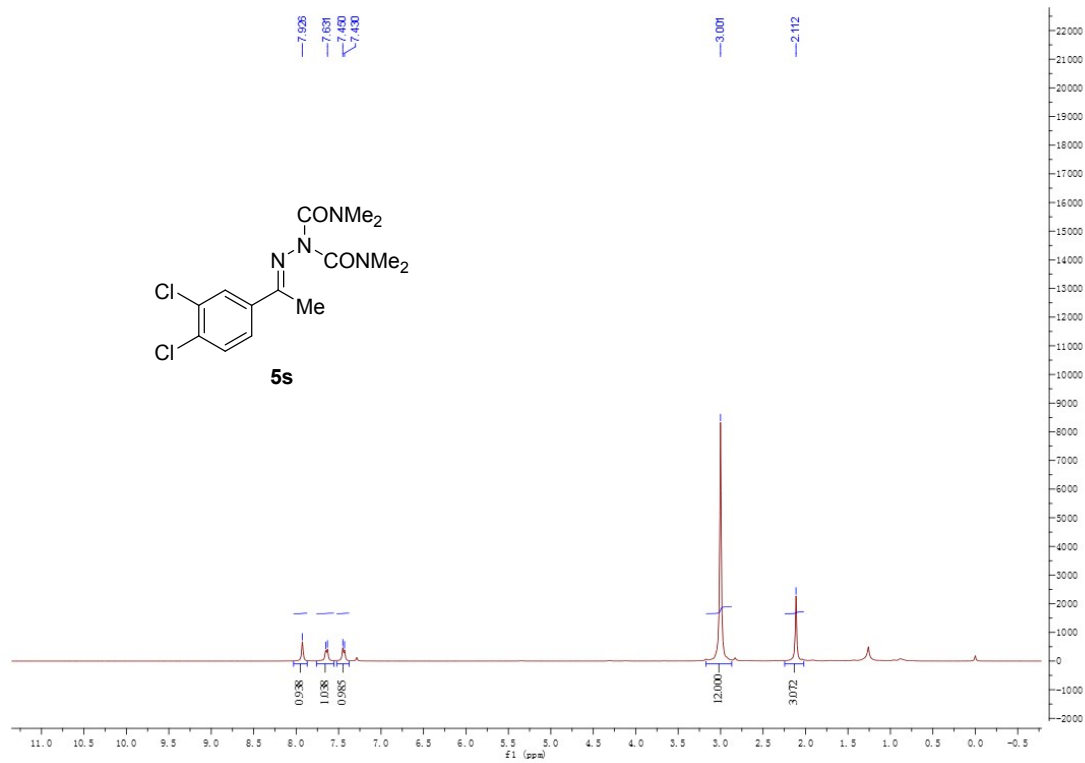

**<sup>13</sup>C NMR (100 MHz, CDCl<sub>3</sub>) spectrum for 5s**

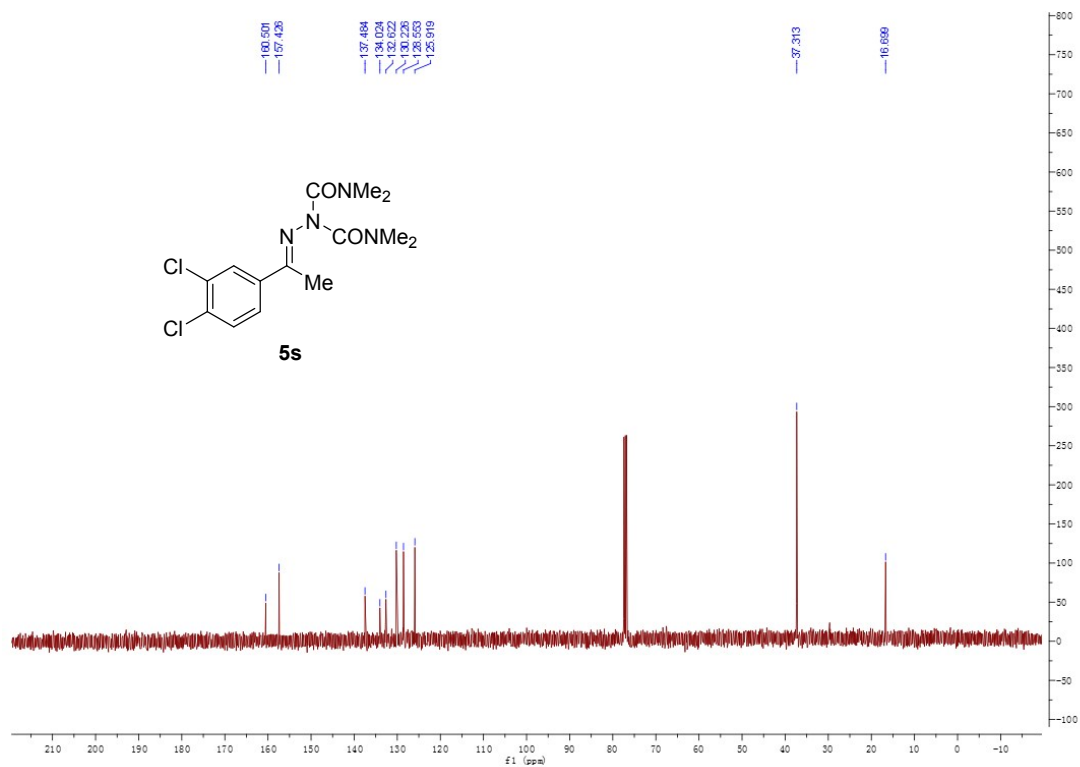

**<sup>1</sup>H NMR (400 MHz, CDCl<sub>3</sub>) spectrum for 5t**

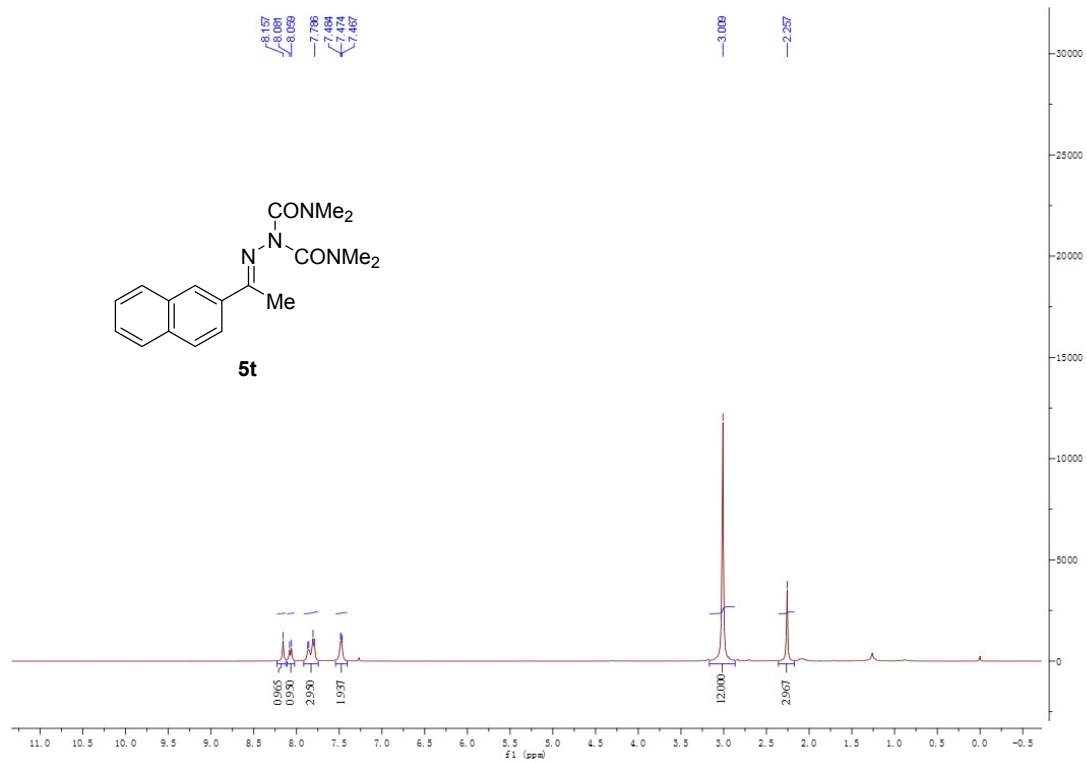

**<sup>13</sup>C NMR (100 MHz, CDCl<sub>3</sub>) spectrum for 5t**

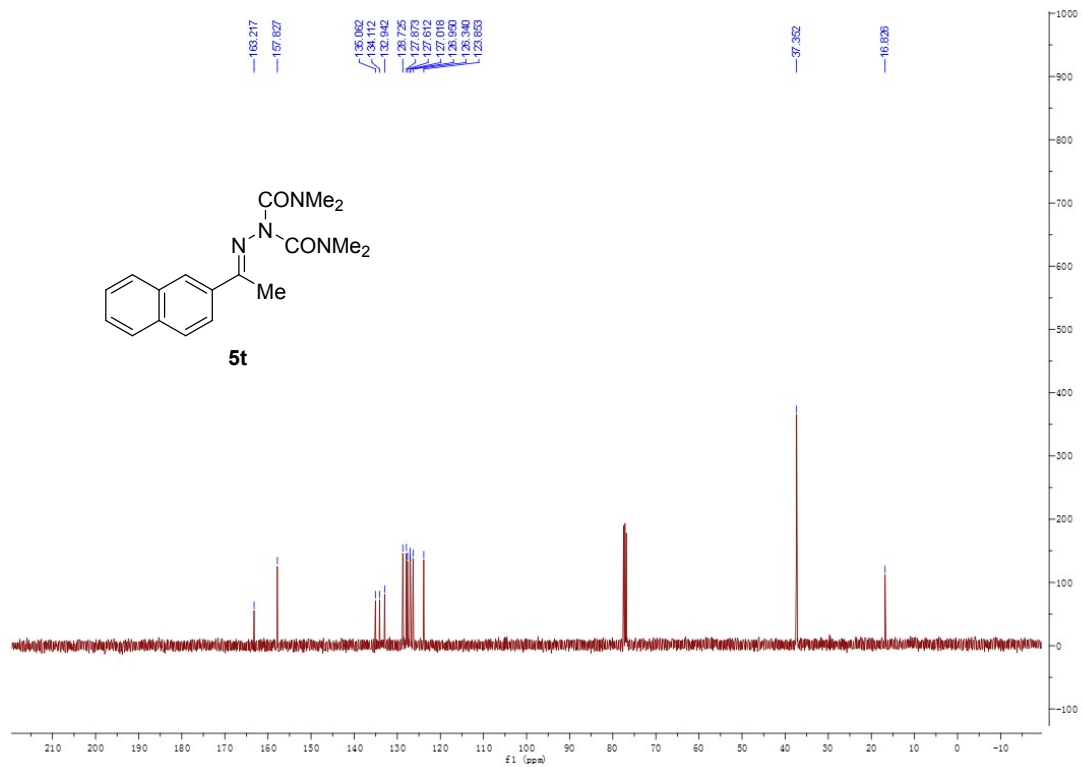

**<sup>1</sup>H NMR (400 MHz, CDCl<sub>3</sub>) spectrum for 5u**

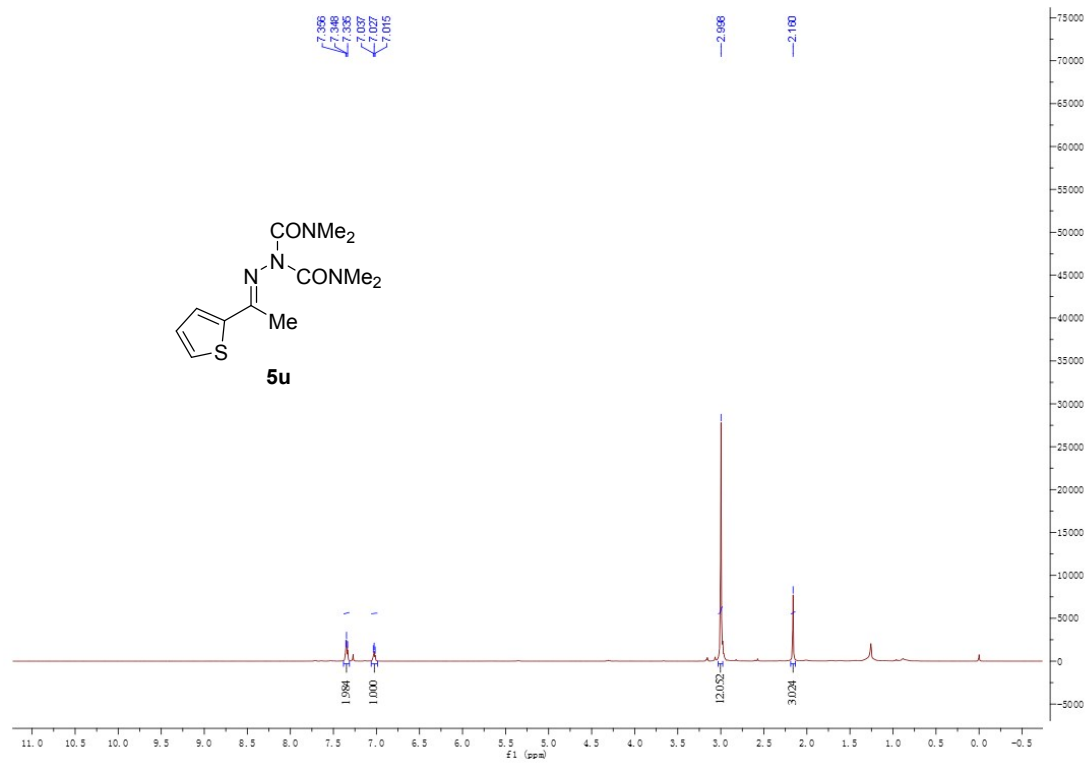

**<sup>13</sup>C NMR (100 MHz, CDCl<sub>3</sub>) spectrum for 5u**

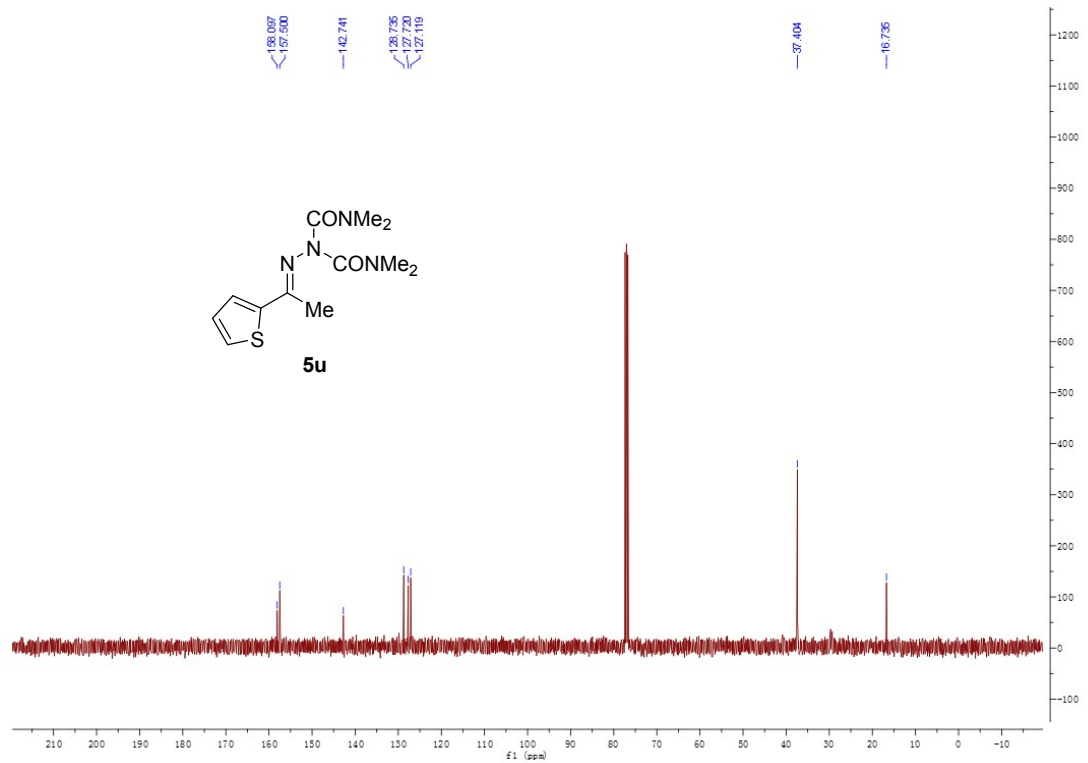

**<sup>1</sup>H NMR (400 MHz, CDCl<sub>3</sub>) spectrum for 5v**

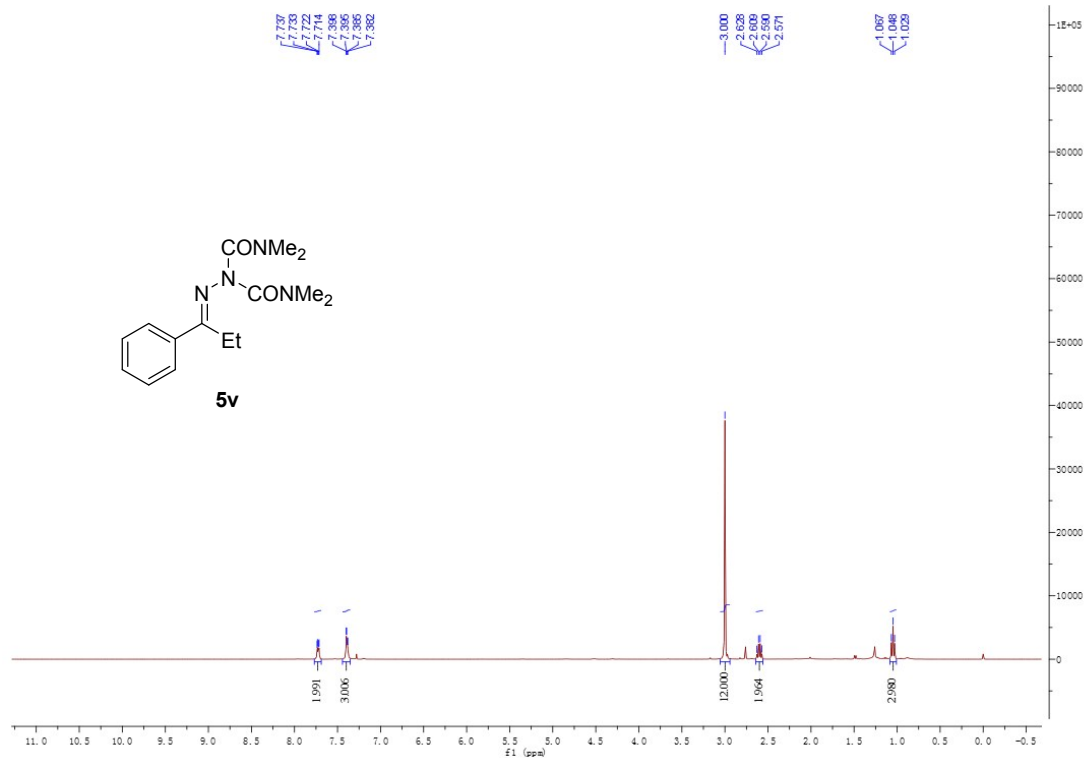

**<sup>13</sup>C NMR (100 MHz, CDCl<sub>3</sub>) spectrum for 5v**

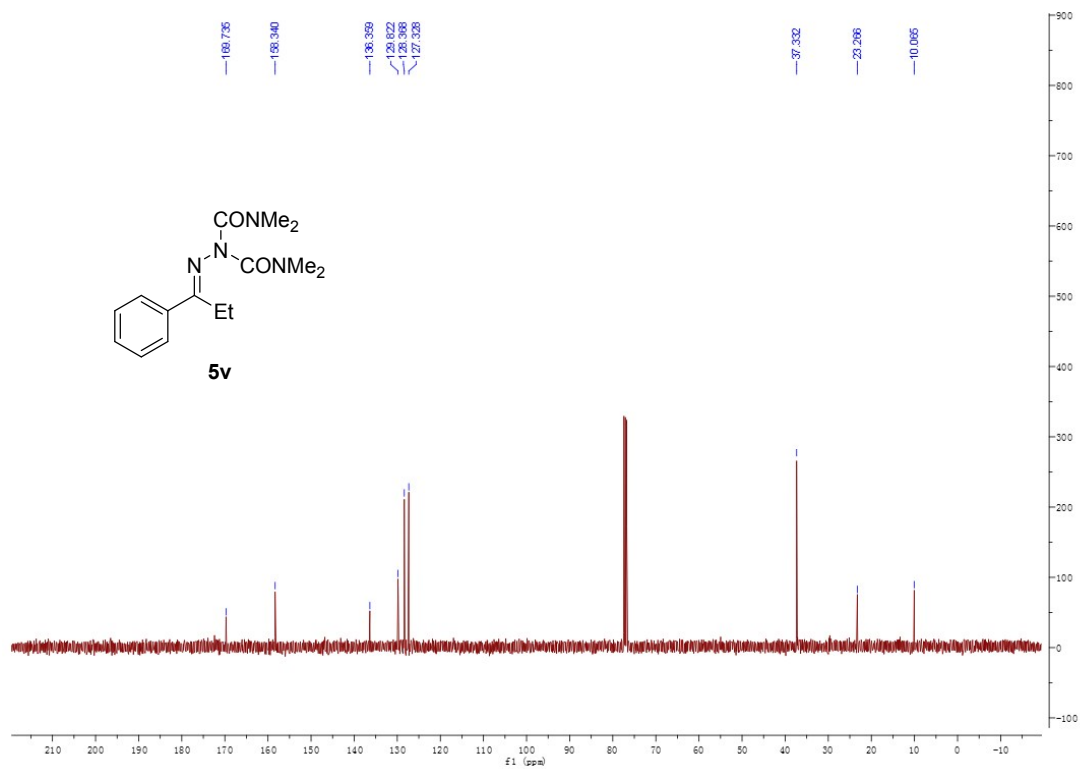

**<sup>1</sup>H NMR (400 MHz, CDCl<sub>3</sub>) spectrum for 5w**

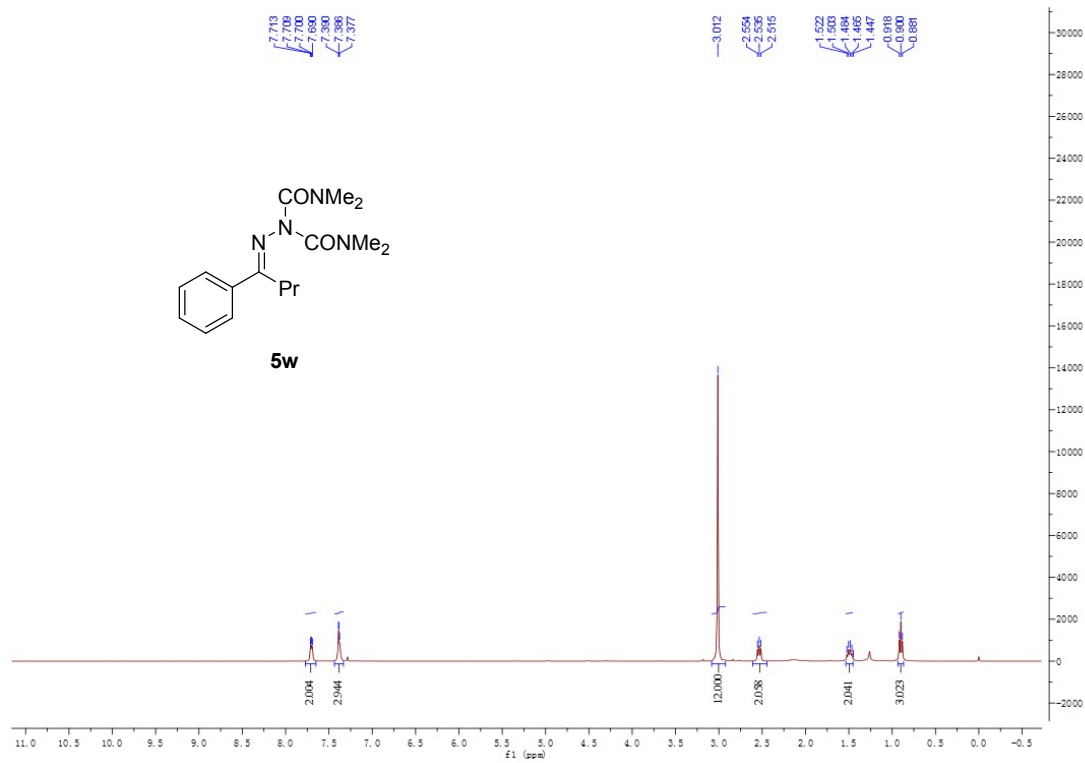

**<sup>13</sup>C NMR (100 MHz, CDCl<sub>3</sub>) spectrum for 5w**

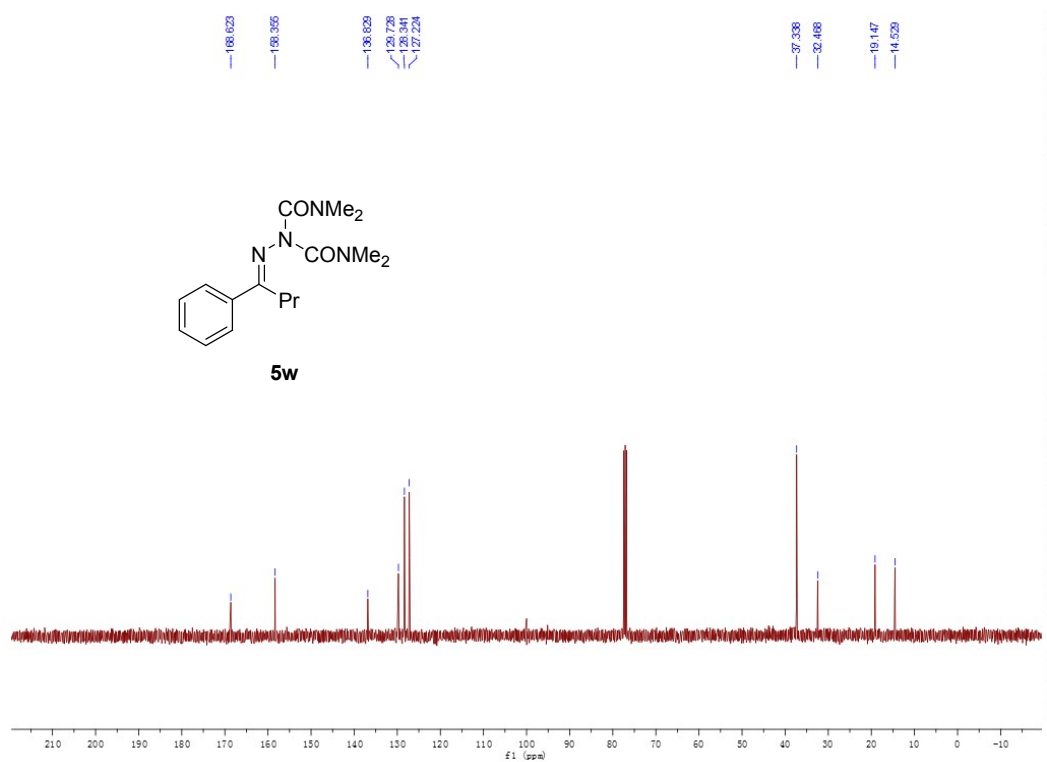



**<sup>1</sup>H NMR (400 MHz, CDCl<sub>3</sub>) spectrum for 5x**

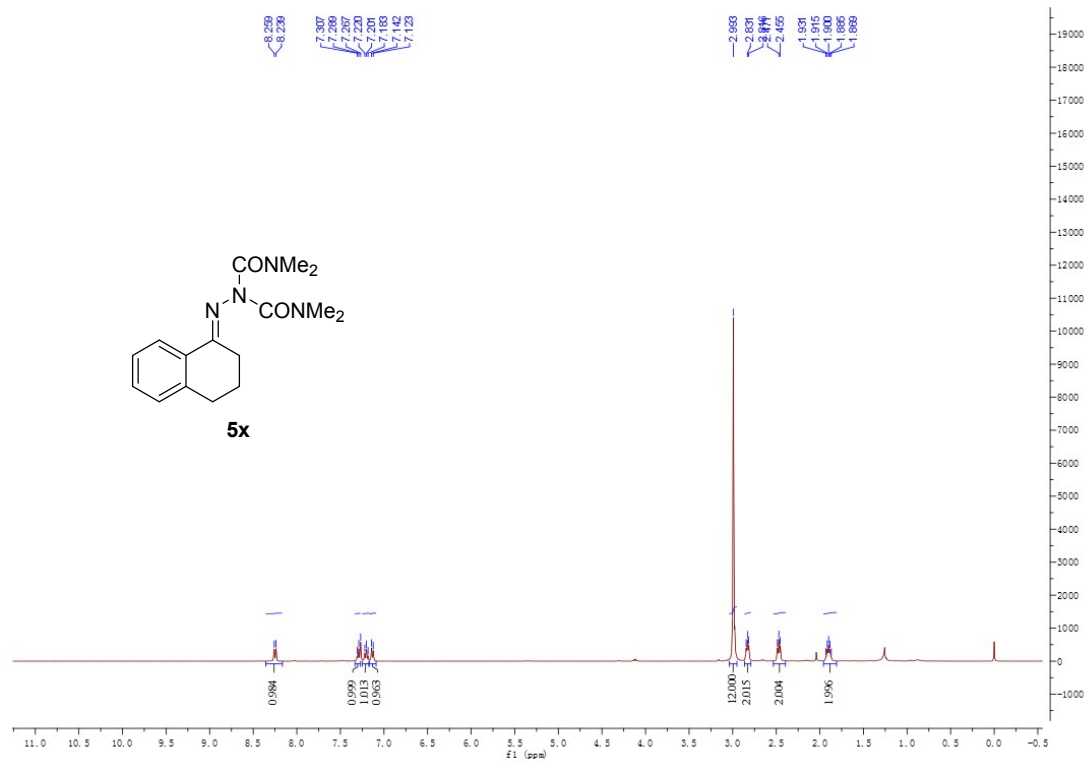

**<sup>13</sup>C NMR (100 MHz, CDCl<sub>3</sub>) spectrum for 5x**

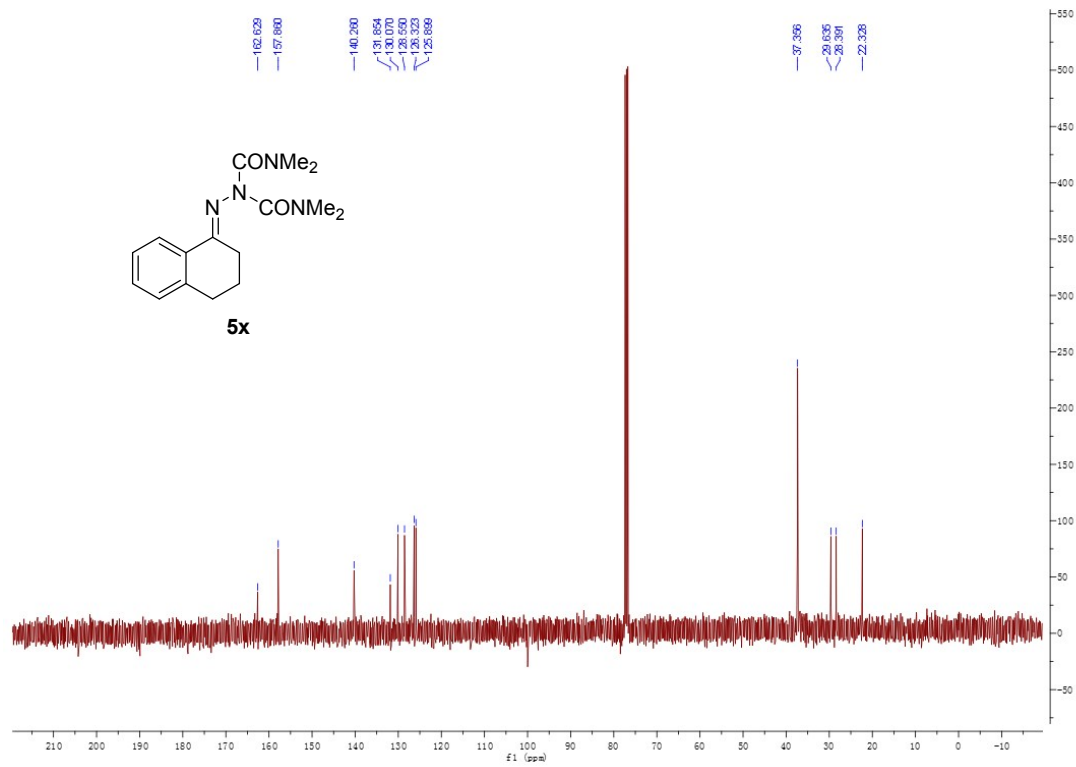

**<sup>1</sup>H NMR (400 MHz, CDCl<sub>3</sub>) spectrum for 5y**

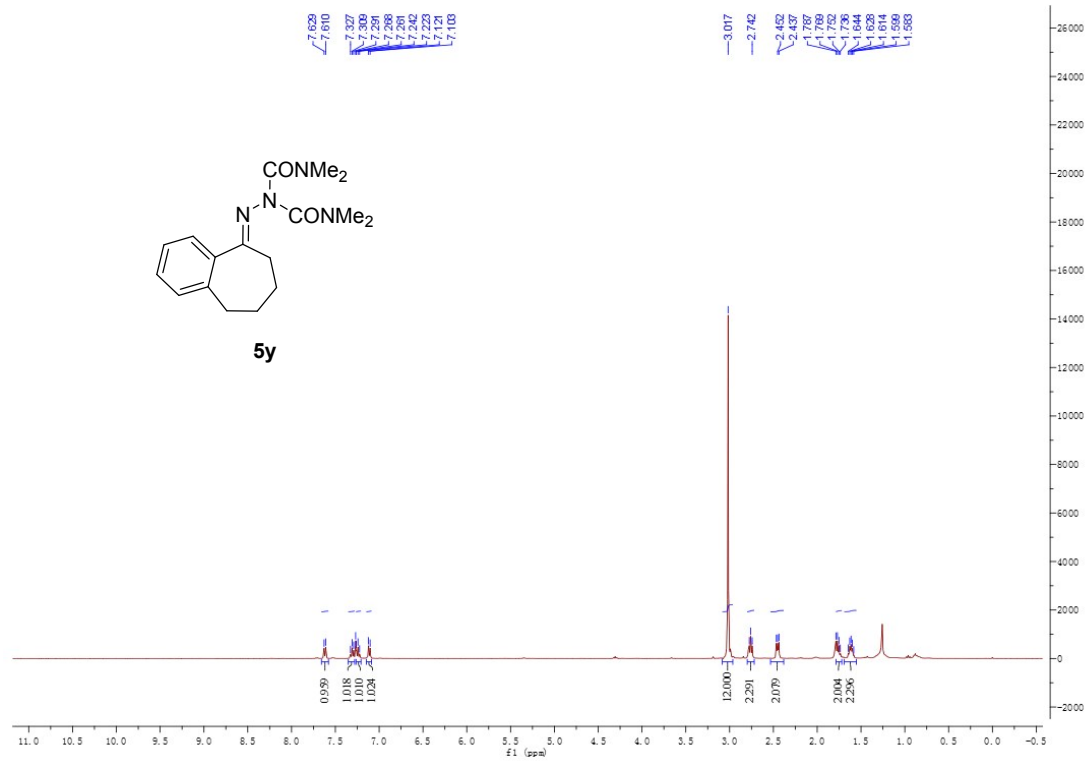

**<sup>13</sup>C NMR (100 MHz, CDCl<sub>3</sub>) spectrum for 5y**

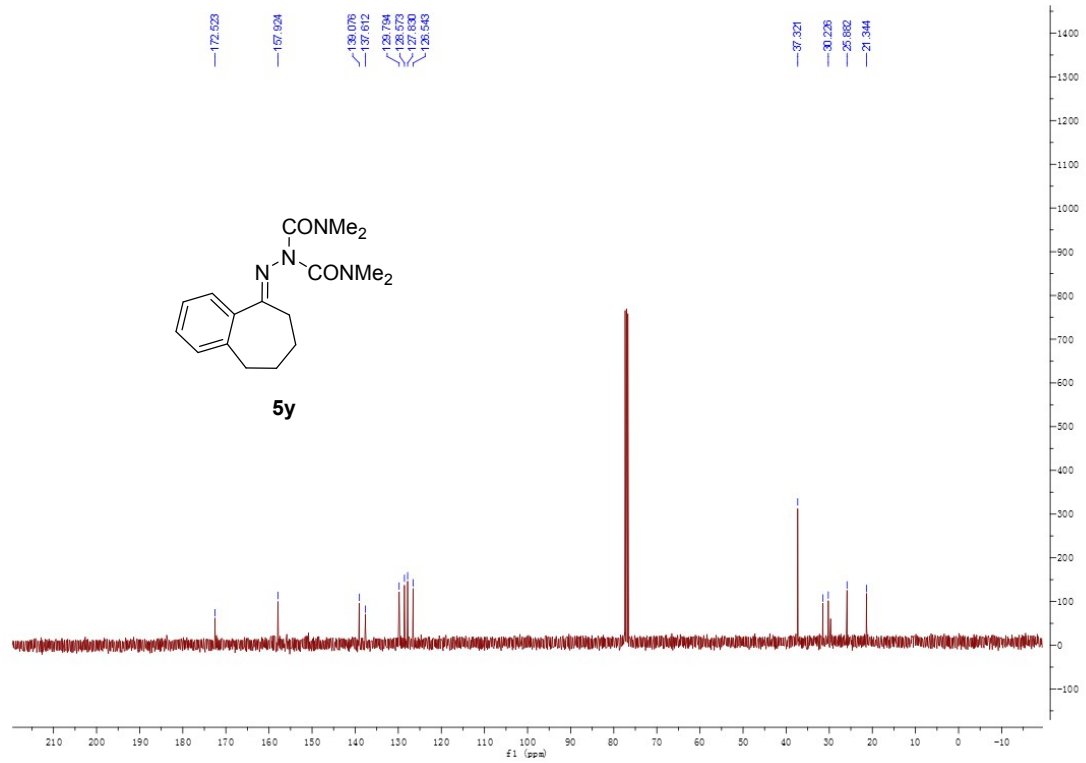

**<sup>1</sup>H NMR (400 MHz, CDCl<sub>3</sub>) spectrum for 5z**

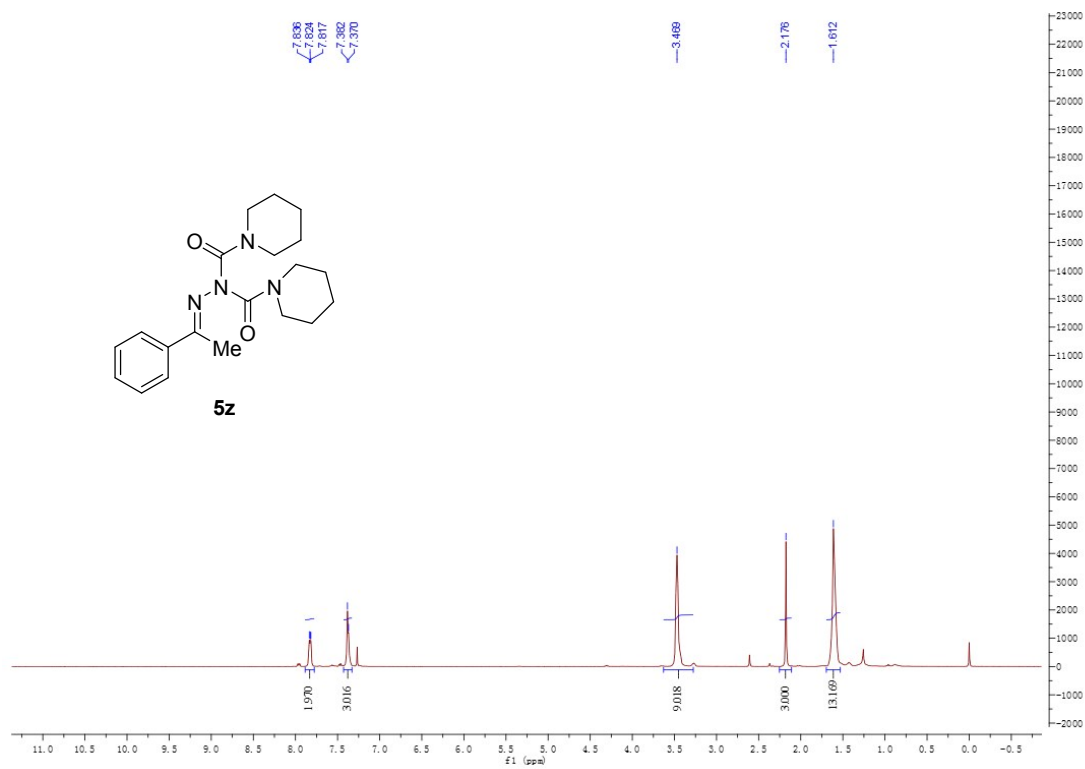

**<sup>13</sup>C NMR (100 MHz, CDCl<sub>3</sub>) spectrum for 5z**

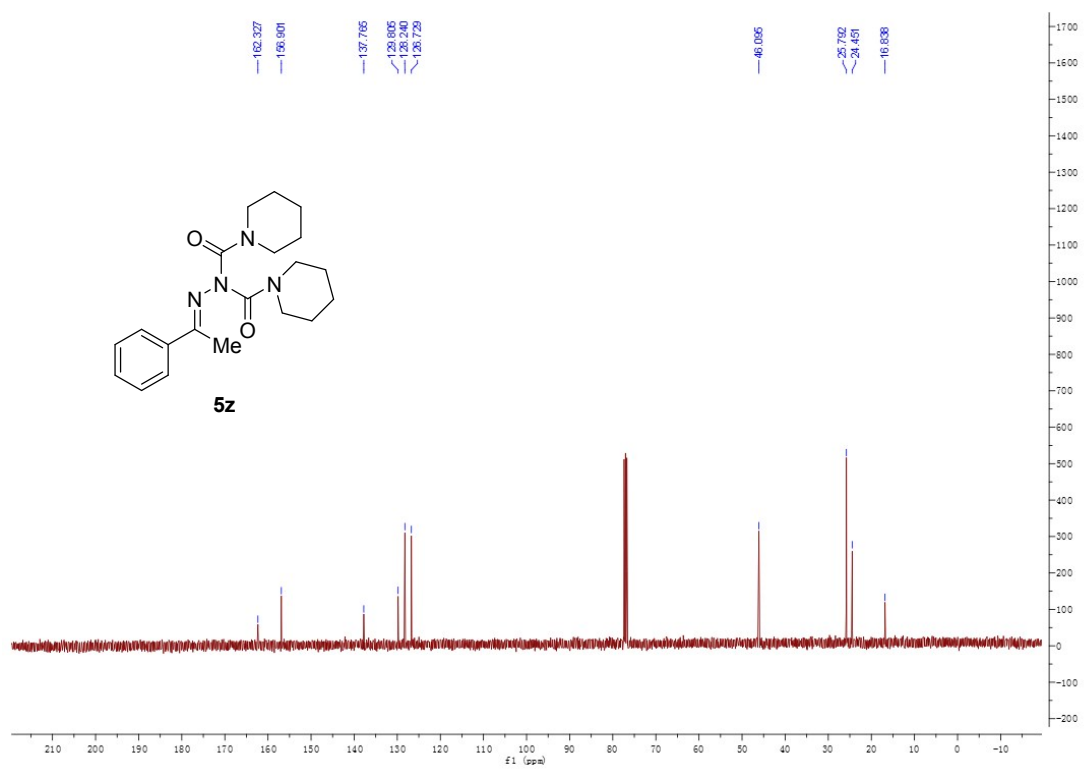

### <sup>1</sup>H NMR (400 MHz, CDCl<sub>3</sub>) spectrum for 6a

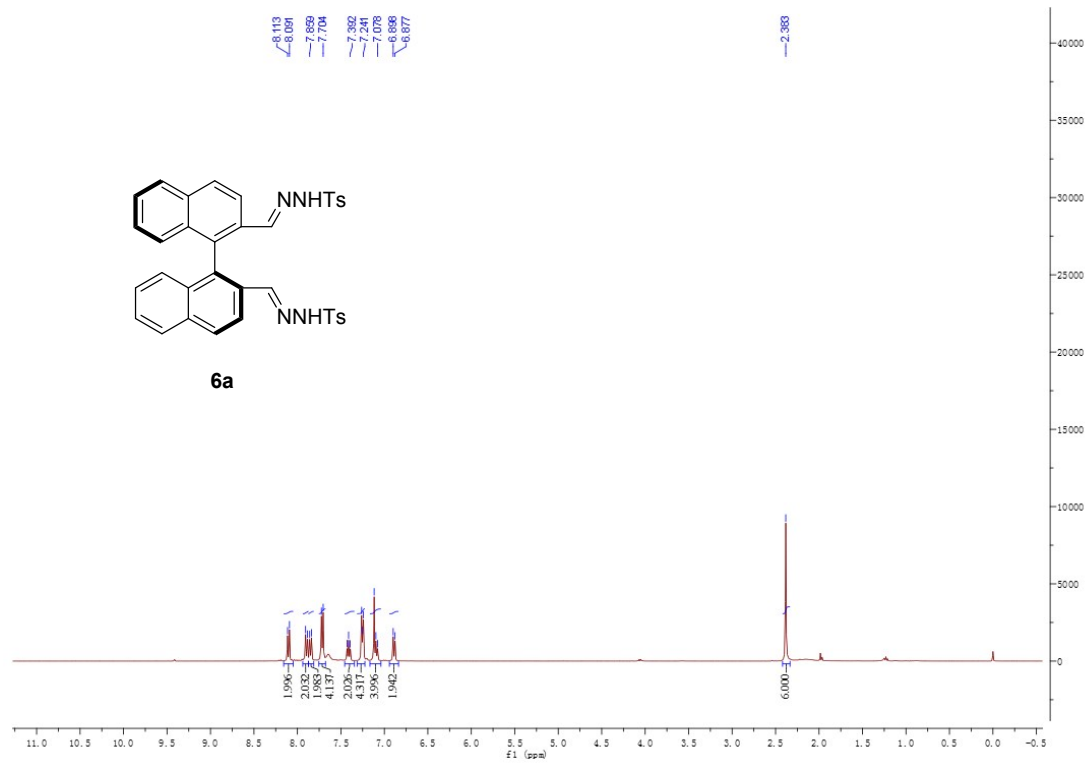

### <sup>13</sup>C NMR (100 MHz, CDCl<sub>3</sub>) spectrum for 6a

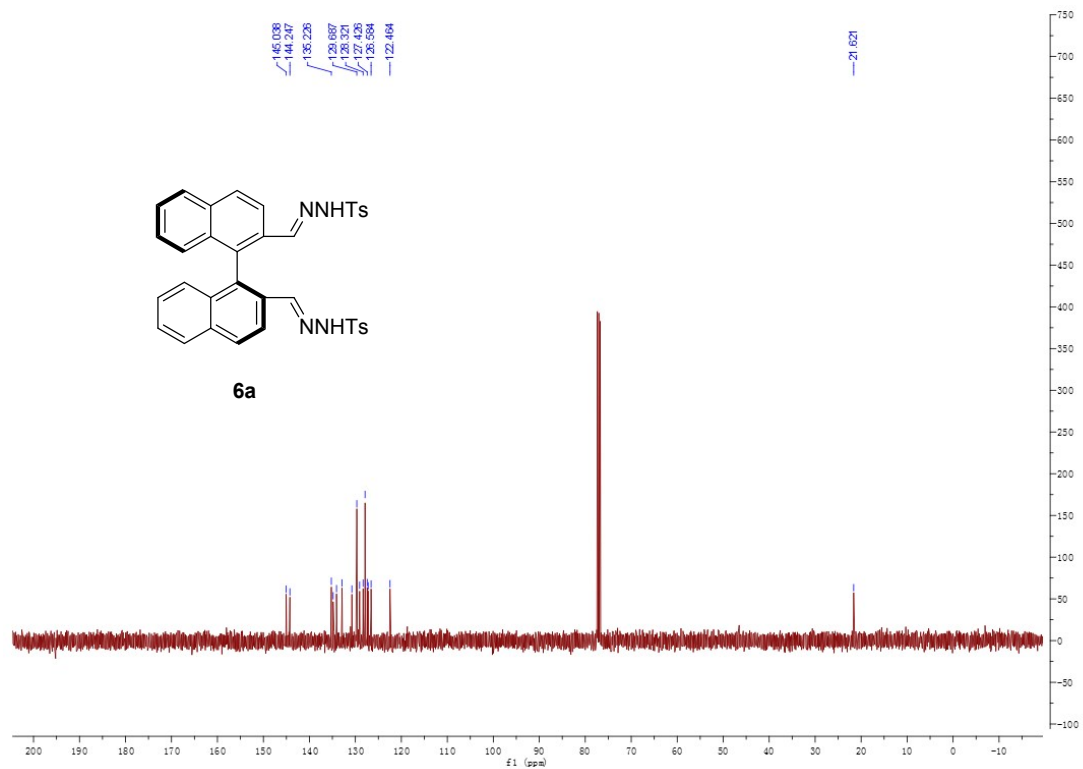

**<sup>1</sup>H NMR (400 MHz, CDCl<sub>3</sub>) spectrum for 7a**

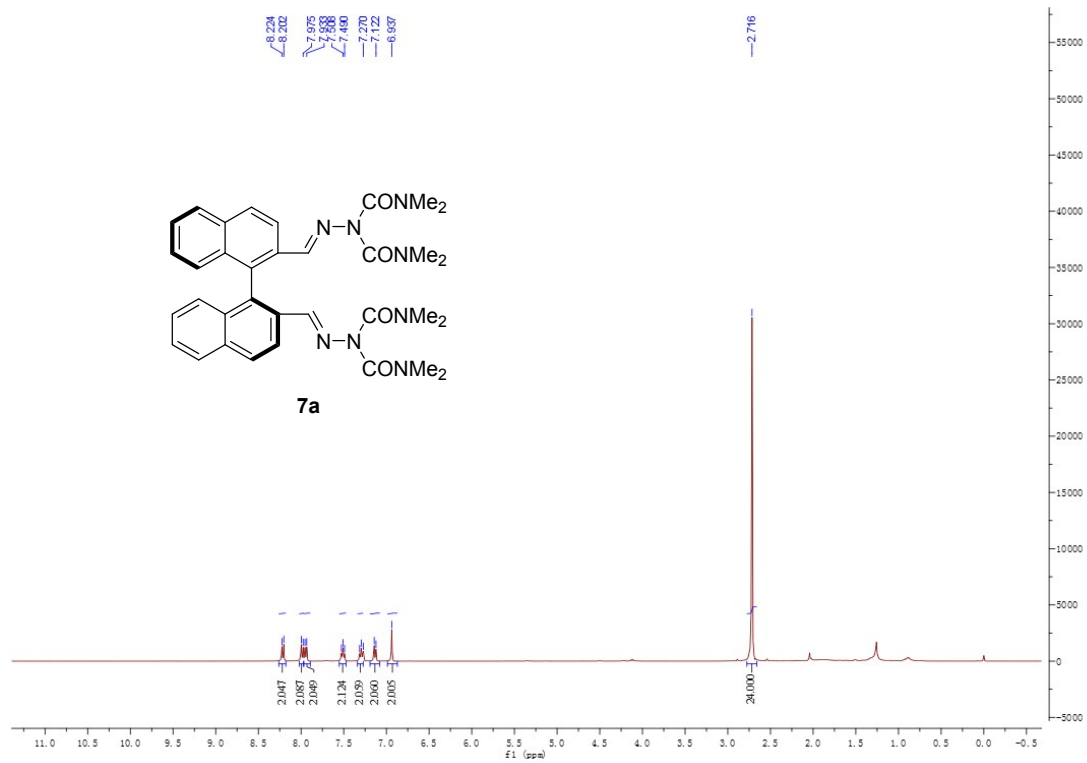

**<sup>13</sup>C NMR (100 MHz, CDCl<sub>3</sub>) spectrum for 7a**

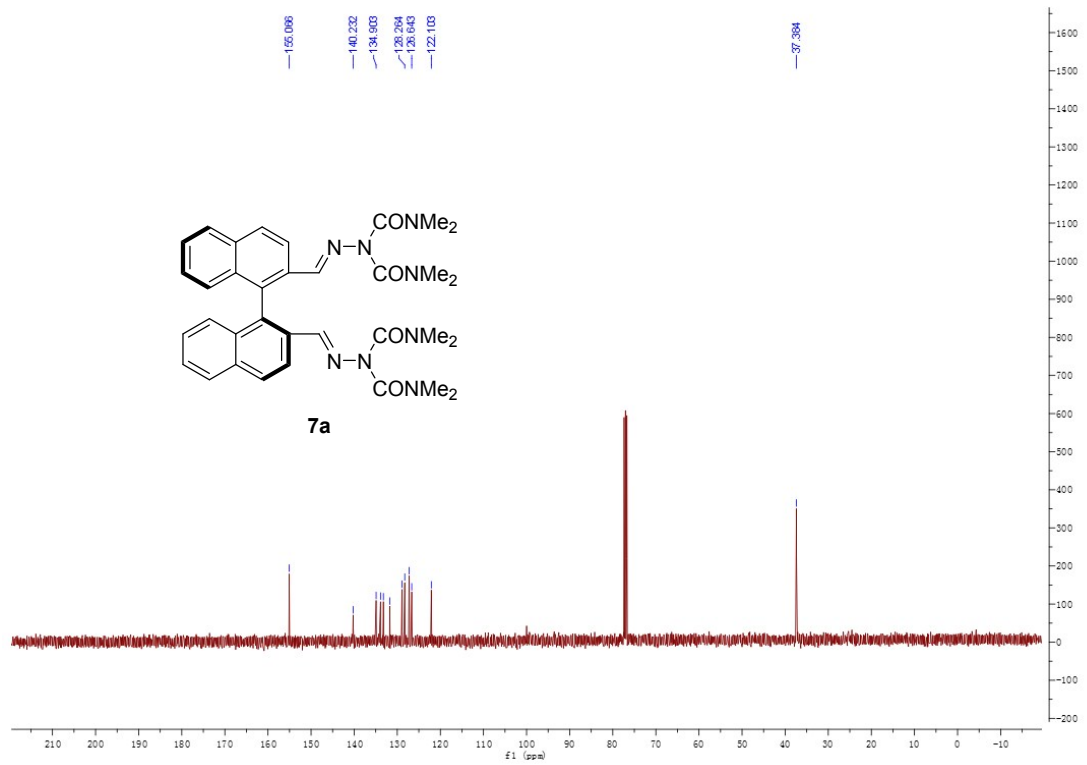

**<sup>1</sup>H NMR (400 MHz, CDCl<sub>3</sub>) spectrum for 7b**

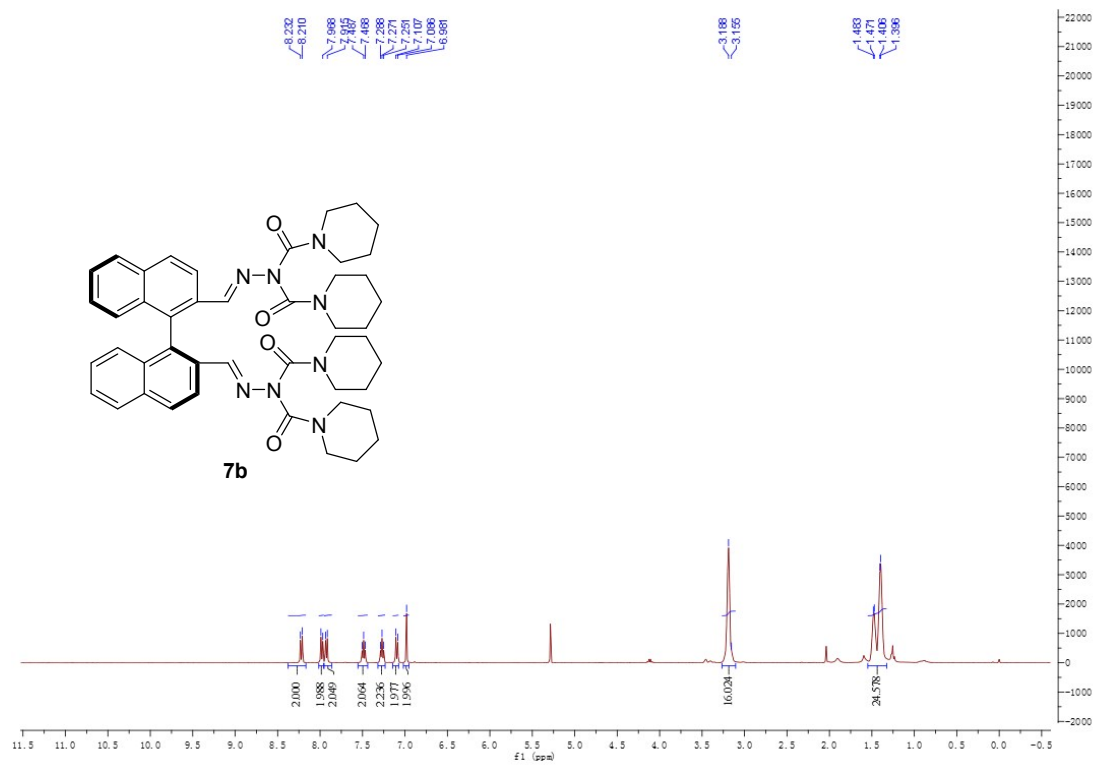

**<sup>13</sup>C NMR (100 MHz, CDCl<sub>3</sub>) spectrum for 7b**

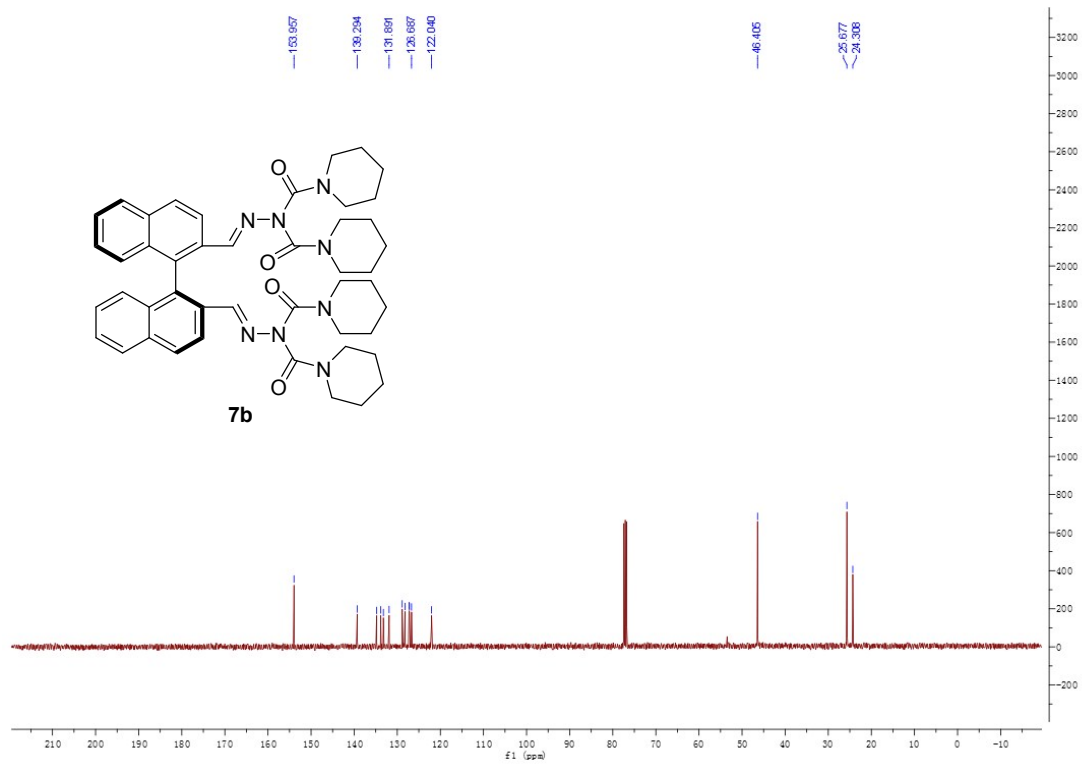

**<sup>1</sup>H NMR (400 MHz, CDCl<sub>3</sub>) spectrum for 7c**

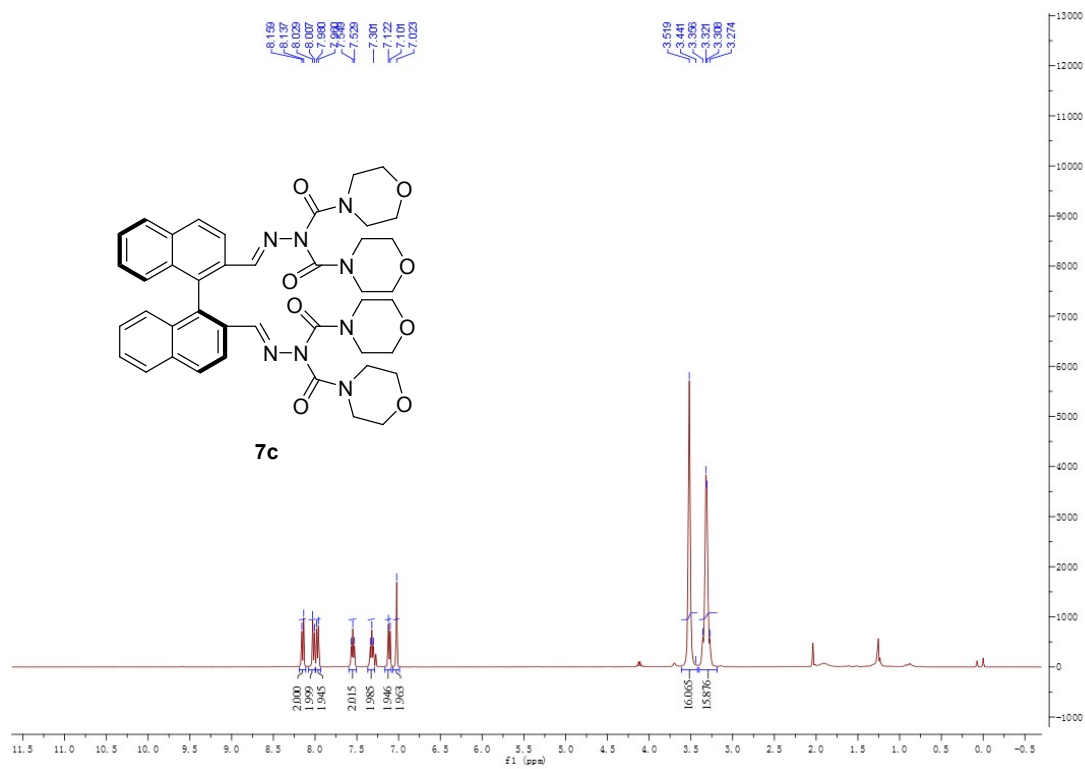

**<sup>13</sup>C NMR (100 MHz, CDCl<sub>3</sub>) spectrum for 7c**

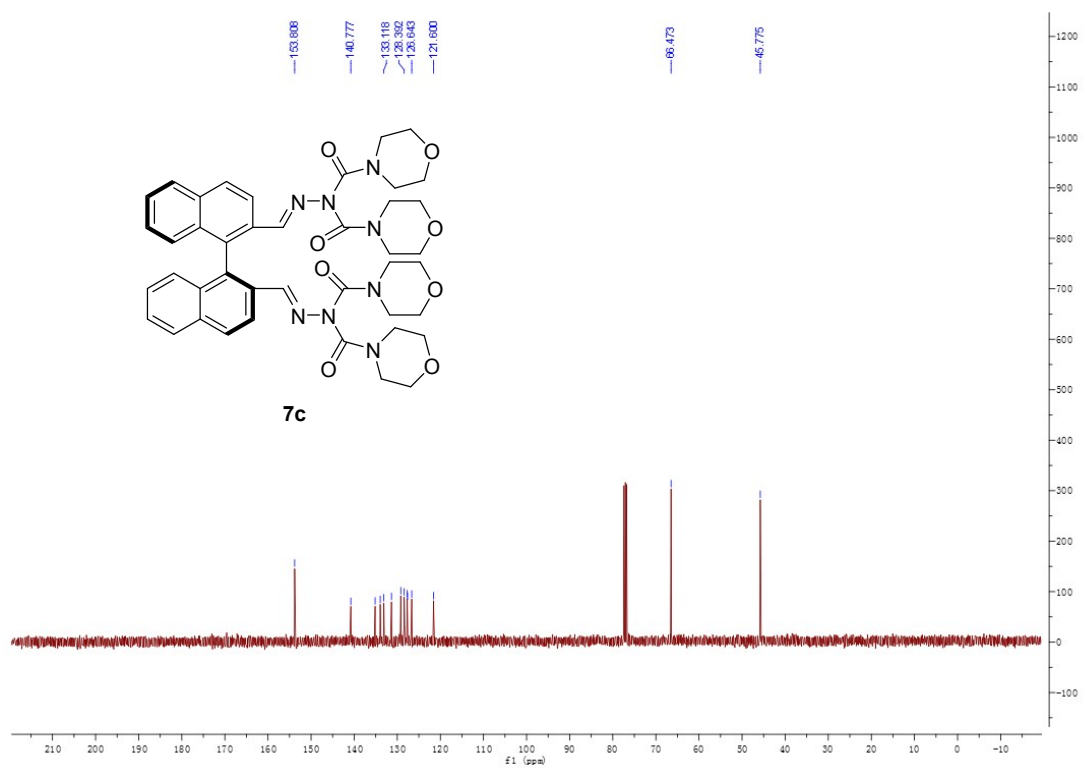

Supplement: c6cc10187a1.pdf [file c6cc10187a1.pdf]
